# Supplementary material for: A cascade strategy for vinyl chloride-substituted BODIPYs with tunable photophysical properties
Source: Royal Society of Chemistry journal article supplement (doi:10.1039/d5cc00613a), 2025-01-01
Supplement: d5cc00613a1.pdf [file d5cc00613a1.pdf]

*Electronic Supporting Information for*

**A Cascade Strategy for Vinyl Chloride-Substituted BODIPYs  
with Tunable Photophysical Properties**

Fan Lv,<sup>a,b</sup> Xing Guo,<sup>a</sup> Shuangshuang Zhu,<sup>b</sup> Sen Huang,<sup>b</sup> Li Li,<sup>b</sup> Shaozhen Wang,<sup>\*,b</sup>  
Lijuan Jiao<sup>\*,a</sup> and Erhong Hao<sup>\*,a</sup>

<sup>a</sup>Laboratory of Functional Molecular Solids, Ministry of Education; School of Chemistry and  
Materials Science, Anhui Normal University, Wuhu 241002, China;

<sup>b</sup>Institute of Synthesis and Application of Medical Materials, School of Pharmacy, WanNan  
Medical College, Wuhu, 241002, China.

\* Correspondence authors. E-mail: [wangshaozhen@wnmc.edu.cn](mailto:wangshaozhen@wnmc.edu.cn),  
[haoehong@ahnu.edu.cn](mailto:haoehong@ahnu.edu.cn), [jiao421@ahnu.edu.cn](mailto:jiao421@ahnu.edu.cn).

**Contents**

|                                                                                                                       |     |
|-----------------------------------------------------------------------------------------------------------------------|-----|
| 1. General information .....                                                                                          | S2  |
| 2. Figure S1.....                                                                                                     | S4  |
| 3. Tables S1 and S2.....                                                                                              | S5  |
| 4. Synthesis and characterization .....                                                                               | S7  |
| 5. Crystal data.....                                                                                                  | S20 |
| 6. Spectroscopic properties.....                                                                                      | S23 |
| 7. UV-Vis absorption and fluorescence emission spectra in CH <sub>2</sub> Cl <sub>2</sub> .....                       | S25 |
| 8. Cellular studies.....                                                                                              | S29 |
| 9. Electrochemical data.....                                                                                          | S33 |
| 10. <sup>1</sup> H, <sup>13</sup> C, <sup>11</sup> B, <sup>19</sup> F NMR and HRMS spectra for all new compounds..... | S36 |

## 1. General information

Reagents and solvents were used as received from commercial suppliers (Energy Chemicals, Shanghai, China) unless noted otherwise. All reactions were performed in oven-dried or flame-dried glassware unless stated otherwise and were monitored by TLC using 0.25 mm silica gel plates with UV indicator (60F-254).  $^1\text{H}$  and  $^{13}\text{C}$  NMR spectra were recorded on a 400 or 500 MHz NMR spectrometer at room temperature. Chemical shifts ( $\delta$ ) are given in ppm relative to  $\text{CDCl}_3$  (7.26 ppm for  $^1\text{H}$  and 77 ppm for  $^{13}\text{C}$ ) or to internal TMS. High-resolution mass spectra (HRMS) were obtained using APCI-TOF in positive mode.

UV-visible absorption and fluorescence emission spectra were recorded on commercial spectrophotometers (Shimadzu UV-2450 and Edinburgh FS5 spectrometers). All measurements were made at 25 °C, using  $5 \times 10$  mm cuvettes. Relative fluorescence quantum efficiencies of BODIPY derivatives were obtained by comparing the areas under the corrected emission spectrum of the test sample in various solvents with Rhodamine B ( $\Phi = 0.49$  in ethanol)<sup>1</sup> and fluorescein ( $\Phi = 0.90$  in 0.1 N NaOH aqueous solution).<sup>2</sup> Non-degassed, spectroscopic grade solvents and a 10 mm quartz cuvette were used. Dilute solutions ( $0.01 < A < 0.05$ ) were used to minimize the reabsorption effects. Quantum yields were determined using the following equation<sup>3</sup>:

$$\Phi_X = \Phi_S (I_X/I_S) (A_S/A_X) (n_X/n_S)^2$$

Where  $\Phi_S$  stands for the reported quantum yield of the standard, I stands for the integrated emission spectra, A stands for the absorbance at the excitation wavelength and  $n$  stands for the refractive index of the solvent being used. X subscript stands for the test sample, and S subscript stands for the standard.

Crystals of compounds **3c** and **3i** suitable for X-ray analysis were obtained *via* the slow diffusion of petroleum ether into their dichloromethane solutions. The vial containing this solution was placed, loosely capped, to promote the crystallization. A suitable crystal was chosen and mounted on a glass fiber using grease. Data were collected using a diffractometer equipped with a graphite crystal monochromator situated in the incident beam for data collection at room temperature. Cell parameters were retrieved using SMART<sup>4</sup> software and refined using SAINT on all observed

reflections. The determination of unit cell parameters and data collections were performed with Mo K $\alpha$  radiation ( $\lambda$ ) at 0.71073 Å. Data reduction was performed using the SAINT software,<sup>5</sup> which corrects for Lp and decay. The structure was solved by the direct method using the SHELXS-974 program and refined by least squares method on F<sup>2</sup>, SHELXL-97,<sup>6</sup> incorporated in SHELXTL V5.10.<sup>7</sup> CCDC-2418848 (**3c**) and CCDC-2010636 (**3i**), contain the supplementary crystallographic data for this paper. These data can be obtained free of charge from The Cambridge Crystallographic Data Centre *via* [www.ccdc.cam.ac.uk/data\\_request/cif](http://www.ccdc.cam.ac.uk/data_request/cif).

## 2. Figure S1

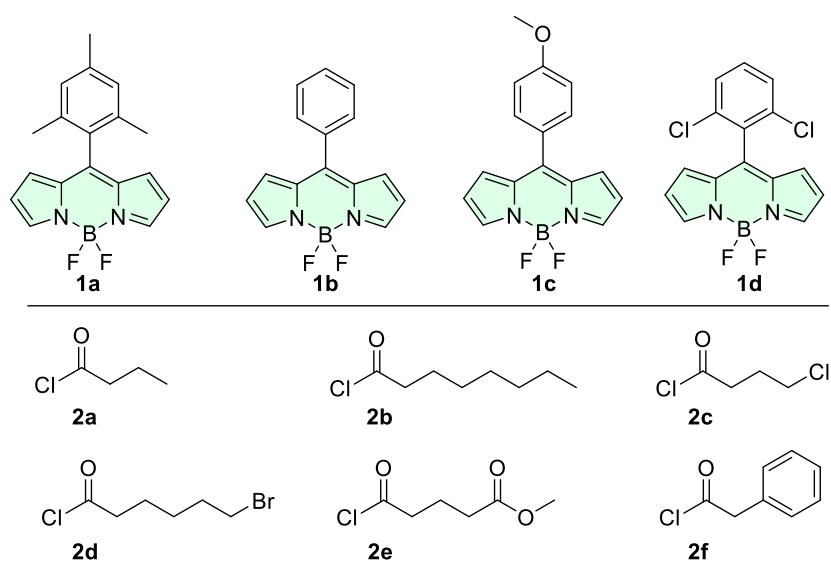

**Figure S1.** Chemical structure of BODIPYs **1a-d** and various acyl chlorides **2a-f**.

### 3. Table S1. Optimization of the Reaction Conditions for 3a.<sup>a</sup>

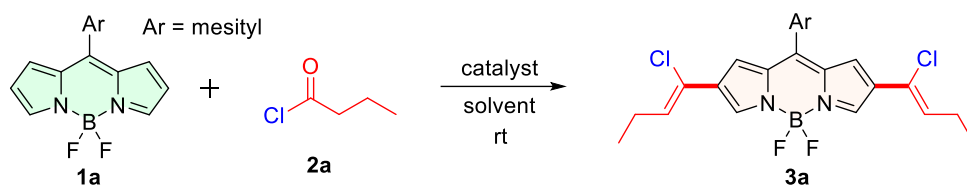

| entry           | catalyst                          | <b>2a</b> (equiv.) | solvent            | yields [%] <sup>b</sup> |
|-----------------|-----------------------------------|--------------------|--------------------|-------------------------|
| 1               | BF <sub>3</sub> ·OEt <sub>2</sub> | 10                 | toluene            | 25                      |
| 2               | TFA                               | 10                 | toluene            | NR                      |
| 3               | FeCl <sub>3</sub>                 | 10                 | toluene            | 45                      |
| 4               | ZnBr <sub>2</sub>                 | 10                 | toluene            | 26                      |
| 5               | ZnCl <sub>2</sub>                 | 10                 | toluene            | 31                      |
| <b>6</b>        | <b>SnCl<sub>4</sub></b>           | <b>10</b>          | <b>toluene</b>     | <b>58</b>               |
| 7               | SnCl <sub>4</sub>                 | 10                 | DCM                | 15                      |
| 8               | SnCl <sub>4</sub>                 | 10                 | DCE                | 17                      |
| 9               | SnCl <sub>4</sub>                 | 10                 | CH <sub>3</sub> CN | 32                      |
| 10              | SnCl <sub>4</sub>                 | 10                 | DMF                | NR                      |
| 11              | SnCl <sub>4</sub>                 | 10                 | DMSO               | NR                      |
| 12 <sup>c</sup> | SnCl <sub>4</sub>                 | 10                 | toluene            | 55                      |
| 13 <sup>d</sup> | SnCl <sub>4</sub>                 | 10                 | toluene            | 56                      |
| 14 <sup>e</sup> | SnCl <sub>4</sub>                 | 10                 | toluene            | 33                      |
| 15 <sup>f</sup> | SnCl <sub>4</sub>                 | 10                 | toluene            | 56                      |
| 16              | SnCl <sub>4</sub>                 | 12                 | toluene            | 57                      |
| 17 <sup>g</sup> | SnCl <sub>4</sub>                 | 8                  | toluene            | 31                      |

<sup>a</sup>Reaction condition: **1a** (0.1 mmol), **2a** (1.0 mmol), catalyst (0.1 mmol), toluene (1 mL), rt, 3 h. <sup>b</sup>Isolated yields based on **1a**. <sup>c</sup>The reaction temperature was raised to 80 °C. <sup>d</sup>The reaction time extended to 12 h. <sup>e</sup>0.5 equiv. Of SnCl<sub>4</sub> was used. <sup>f</sup>1.5 equiv. of SnCl<sub>4</sub> was used. <sup>g</sup>The β-vinyl chloride-β'-acyl-BODIPY **4a** was isolated in 27% yield. NR = no reaction.

**Table S2. Optimization of the reaction conditions for 4a<sup>a</sup>.**

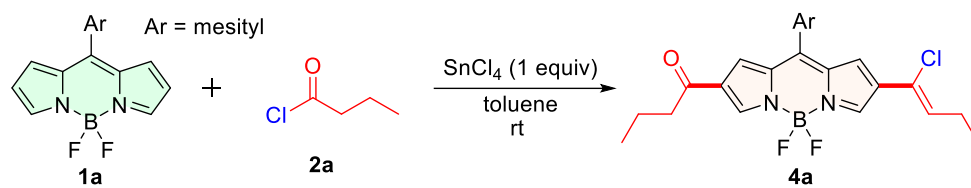

| entry    | <b>2a</b> (equiv) | yield <sup>b</sup> (%) |
|----------|-------------------|------------------------|
| 1        | 9                 | 11                     |
| 2        | 8                 | 27                     |
| 3        | 7                 | 45                     |
| <b>4</b> | <b>6</b>          | <b>65</b>              |
| 5        | 5                 | 56                     |

<sup>a</sup>Reaction condition: **1a** (0.1 mmol), **2a** (0.6 mmol), catalyst (0.1 mmol), toluene (1 mL), rt, 3 h.

<sup>b</sup>Isolated yields based on **1a**.

## 4. Synthesis and characterization

### General procedure for the synthesis of 3a-g

BODIPY **1** (1 equiv, 0.2 mmol), **2** (10 equiv, 2 mmol), SnCl<sub>4</sub> (1 equiv, 0.2 mmol), were dissolved in toluene (2 mL). The reaction mixture was stirred at room temperature and the reaction was followed by TLC. After completion of the reaction, the reaction mixture was poured into dichloromethane (100 mL), and saturated aqueous NaHCO<sub>3</sub> solution (25 mL) was added to remove excess acyl chloride. The organic layer was collected and was washed three times with water (100 mL), dried over Na<sub>2</sub>SO<sub>4</sub>, filtered, and evaporated to dryness. The crude product was purified by column chromatographically (silica; petroleum ether/ethyl acetate; 30:1-10:1 v/v).

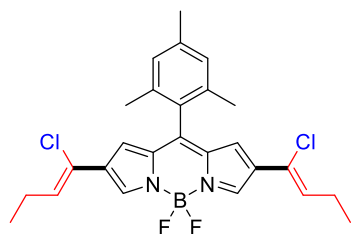

**3a** was prepared in 58% yield (red solid, 56 mg) from BODIPY **1a** (62 mg, 0.2 mmol) and **2a** (0.21 mL, 2 mmol), SnCl<sub>4</sub> (0.026 mL, 0.2 mmol) were dissolved in toluene (2 mL). <sup>1</sup>H NMR (500 MHz, CDCl<sub>3</sub>) δ 8.07 (s, 2H), 6.99 (s, 2H), 6.64 (s, 2H), 6.06 (t, *J* = 7.1 Hz, 2H), 2.39 (s, 3H), 2.35-2.29 (m, 4H), 2.12 (s, 6H), 1.05 (t, *J* = 7.6 Hz, 6H); <sup>13</sup>C NMR (101 MHz, CDCl<sub>3</sub>) δ 147.8, 142.0, 139.2, 136.3, 135.5, 132.9, 129.2, 128.4, 128.3, 124.5, 124.4, 22.4, 21.2, 20.0, 13.01. <sup>11</sup>B NMR (128 MHz, CDCl<sub>3</sub>) δ 0.06 (t, *J* = 28.2 Hz); <sup>19</sup>F NMR (376 MHz, CDCl<sub>3</sub>) δ -145.68 (q, *J* = 30.1 Hz). HRMS calcd for C<sub>26</sub>H<sub>27</sub>BCl<sub>2</sub>FN<sub>2</sub> (M-F)<sup>+</sup> 467.1628, found 467.1605.

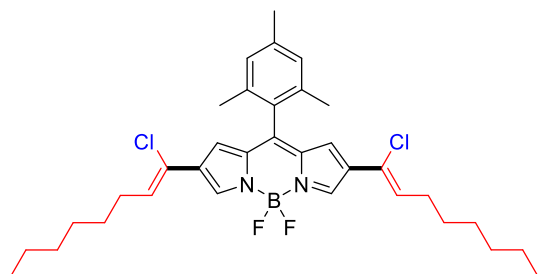

**3b** was prepared in 62% yield (red solid, 74 mg) from BODIPY **1a** (62 mg, 0.2 mmol) and **2b** (0.34 mL, 2 mmol), SnCl<sub>4</sub> (0.026 mL, 0.2 mmol) were dissolved in toluene (2 mL). <sup>1</sup>H NMR (400 MHz, CDCl<sub>3</sub>) δ 8.07 (s, 2H), 6.99 (s, 2H), 6.63 (s, 2H), 6.06 (t, *J*

= 7.2 Hz, 2H), 2.39 (s, 3H), 2.33-2.28 (m, 4H), 2.12 (s, 6H), 1.47-1.40 (m, 4H), 1.37-1.26 (m, 12H), 0.88 (t,  $J = 8.0$  Hz, 6H);  $^{13}\text{C}$  NMR (126 MHz,  $\text{CDCl}_3$ )  $\delta$  148.1, 142.4, 139.5, 136.7, 135.8, 133.3, 129.6, 128.8, 127.5, 125.3, 124.8, 32.0, 29.5, 29.4, 28.9, 23.0, 21.6, 20.5, 14.5.  $^{11}\text{B}$  NMR (128 MHz,  $\text{CDCl}_3$ )  $\delta$  0.06 (t,  $J = 28.2$  Hz);  $^{19}\text{F}$  NMR (376 MHz,  $\text{CDCl}_3$ )  $\delta$  -145.88 (q,  $J = 26.3$  Hz). HRMS calcd for  $\text{C}_{34}\text{H}_{44}\text{BCl}_2\text{F}_2\text{N}_2$  ( $\text{M}+\text{H}$ ) $^+$  599.2943, found 599.2933.

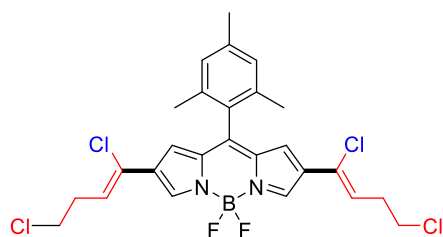

**3c** was prepared in 55% yield (red solid, 60 mg) from BODIPY **1a** (62 mg, 0.2 mmol) and **2c** (0.22 mL, 2 mmol),  $\text{SnCl}_4$  (0.026 mL, 0.2 mmol) were dissolved in toluene (2 mL).  $^1\text{H}$  NMR (500 MHz,  $\text{CDCl}_3$ )  $\delta$  8.11 (s, 2H), 7.00 (s, 2H), 6.69 (s, 2H), 6.13 (t,  $J = 6.9$  Hz, 2H), 3.61 (t,  $J = 6.6$  Hz, 4H), 2.82-2.78 (m, 4H), 2.39 (s, 3H), 2.12 (s, 6H);  $^{13}\text{C}$  NMR (126 MHz,  $\text{CDCl}_3$ )  $\delta$  149.0, 142.7, 139.8, 136.6, 136.0, 132.7, 129.3, 128.9, 127.9, 125.3, 122.5, 43.3, 32.6, 21.6, 20.5.  $^{11}\text{B}$  NMR (128 MHz,  $\text{CDCl}_3$ )  $\delta$  0.05 (t,  $J = 28.2$  Hz);  $^{19}\text{F}$  NMR (376 MHz,  $\text{CDCl}_3$ )  $\delta$  -145.77 (q,  $J = 30.1$  Hz). HRMS calcd for  $\text{C}_{26}\text{H}_{25}\text{BCl}_4\text{FN}_2$  ( $\text{M}-\text{F}$ ) $^+$  535.0849, found 535.0845.

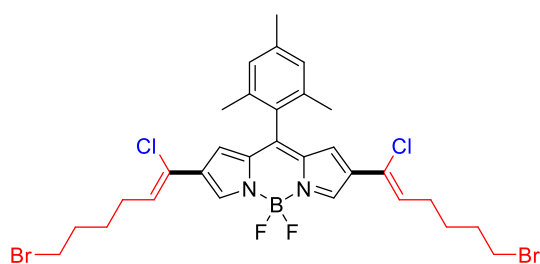

**3d** was prepared in 60% yield (red solid, 83 mg) from BODIPY **1a** (62 mg, 0.2 mmol) and **2d** (0.31 mL, 2 mmol),  $\text{SnCl}_4$  (0.026 mL, 0.2 mmol) were dissolved in toluene (2 mL).  $^1\text{H}$  NMR (400 MHz,  $\text{CDCl}_3$ )  $\delta$  8.07 (s, 2H), 6.99 (s, 2H), 6.64 (s, 2H), 6.05 (t,  $J = 7.2$  Hz, 2H), 3.42 (t,  $J = 6.7$  Hz, 4H), 2.39 (s, 3H), 2.37-2.33 (m, 4H), 2.12 (s, 6H), 1.93-1.86 (m, 4H), 1.65-1.57 (m, 4H);  $^{13}\text{C}$  NMR (126 MHz,  $\text{CDCl}_3$ )  $\delta$  148.5, 142.5, 139.6, 136.7, 135.9, 133.1, 129.5, 128.8, 126.3, 126.1, 124.9, 33.8, 32.5, 28.5, 27.4, 21.6, 20.5.  $^{11}\text{B}$  NMR (128 MHz,  $\text{CDCl}_3$ )  $\delta$  0.06 (t,  $J = 28.2$  Hz);  $^{19}\text{F}$  NMR (376 MHz,



$\text{CDCl}_3$ )  $\delta$  -145.77 (q,  $J$  = 26.3 Hz). HRMS calcd for  $\text{C}_{30}\text{H}_{33}\text{BBr}_2\text{Cl}_2\text{FN}_2$  (M-F)<sup>+</sup> 679.0464, found 679.0473.

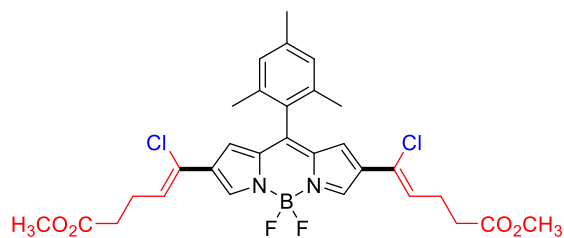

**3e** was prepared in 53% yield (red solid, 64 mg) from BODIPY **1a** (62 mg, 0.2 mmol) and **2e** (0.26 mL, 2 mmol),  $\text{SnCl}_4$  (0.026 mL, 0.2 mmol) were dissolved in toluene (2 mL).  $^1\text{H}$  NMR (400 MHz,  $\text{CDCl}_3$ )  $\delta$  8.08 (s, 2H), 6.99 (s, 2H), 6.65 (s, 2H), 6.09 (t,  $J$  = 7.0 Hz, 2H), 3.69 (s, 6H), 2.66-2.60 (m, 4H), 2.47 (t,  $J$  = 7.2 Hz, 4H), 2.39 (s, 3H), 2.11 (s, 6H).  $^{13}\text{C}$  NMR (101 MHz,  $\text{CDCl}_3$ )  $\delta$  173.1, 148.3, 142.2, 139.3, 136.2, 135.5, 132.5, 129.0, 128.5, 126.4, 124.7, 124.4, 51.8, 32.6, 24.4, 21.2, 20.0.  $^{11}\text{B}$  NMR (128 MHz,  $\text{CDCl}_3$ )  $\delta$  0.04 (t,  $J$  = 28.2 Hz);  $^{19}\text{F}$  NMR (376 MHz,  $\text{CDCl}_3$ )  $\delta$  -145.84 (q,  $J$  = 30.1 Hz). HRMS calcd for  $\text{C}_{30}\text{H}_{31}\text{BCl}_2\text{FN}_2\text{O}_4$  (M-F)<sup>+</sup> 583.1738, found 583.1737.

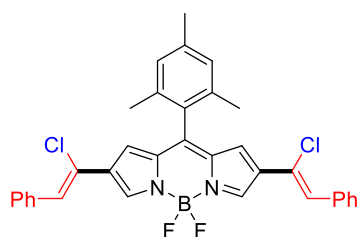

**3f** was prepared in 68% yield (violet solid, 79 mg) from BODIPY **1a** (62 mg, 0.2 mmol) and **2f** (0.26 mL, 2 mmol),  $\text{SnCl}_4$  (0.026 mL, 0.2 mmol) were dissolved in toluene (2 mL).  $^1\text{H}$  NMR (400 MHz,  $\text{CDCl}_3$ )  $\delta$  8.26 (s, 2H), 7.69 (d,  $J$  = 8.1 Hz, 4H), 7.40-7.36 (m, 4H), 7.32-7.28 (m, 2H), 7.04 (s, 2H), 7.01 (s, 2H), 6.81 (s, 2H), 2.41 (s, 3H), 2.18 (s, 6H).  $^{13}\text{C}$  NMR (101 MHz,  $\text{CDCl}_3$ )  $\delta$  148.2, 142.6, 139.4, 136.4, 135.8, 134.5, 133.9, 129.5, 129.1, 128.5, 128.4, 128.3, 124.8, 124.4, 124.1, 21.2, 20.1.  $^{11}\text{B}$  NMR (128 MHz,  $\text{CDCl}_3$ )  $\delta$  0.13 (t,  $J$  = 28.2 Hz);  $^{19}\text{F}$  NMR (376 MHz,  $\text{CDCl}_3$ )  $\delta$  -145.71 (q,  $J$  = 26.3 Hz). HRMS calcd for  $\text{C}_{34}\text{H}_{27}\text{BCl}_2\text{FN}_2$  (M-F)<sup>+</sup> 563.1628, found 563.1609.

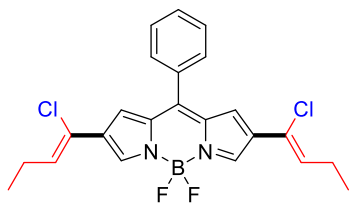

**3g** was prepared in 56% yield (red solid, 49 mg) from BODIPY **1b** (54 mg, 0.2 mmol) and **2a** (0.21 mL, 2 mmol), SnCl<sub>4</sub> (0.026 mL, 0.2 mmol) were dissolved in toluene (2 mL). <sup>1</sup>H NMR (400 MHz, CDCl<sub>3</sub>) δ 8.12 (s, 2H), 7.67-7.59 (m, 5H), 6.93 (s, 2H), 6.11 (t, *J* = 7.1 Hz, 2H), 2.41-2.33 (m, 4H), 1.09 (t, *J* = 7.5 Hz, 6H); <sup>13</sup>C NMR (126 MHz, CDCl<sub>3</sub>) δ 147.3, 141.8, 134.9, 133.4, 132.9, 131.1, 130.4, 128.7, 128.4, 126.1, 124.5, 22.5, 13.1. <sup>11</sup>B NMR (128 MHz, CDCl<sub>3</sub>) δ 0.03 (t, *J* = 46.1 Hz); <sup>19</sup>F NMR (376 MHz, CDCl<sub>3</sub>) δ -145.33 (q, *J* = 26.3 Hz). HRMS calcd for C<sub>23</sub>H<sub>21</sub>BCl<sub>2</sub>FN<sub>2</sub> (M-F)<sup>+</sup> 425.1159, found 425.1183.

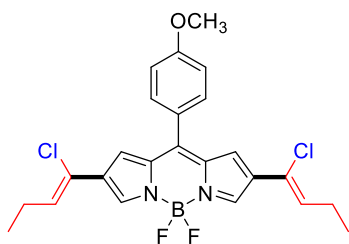

**3h** was prepared in 52% yield (red solid, 49 mg) from BODIPY **1b** (60 mg, 0.2 mmol) and **2a** (0.21 mL, 2 mmol), SnCl<sub>4</sub> (0.026 mL, 0.2 mmol) were dissolved in toluene (2 mL). <sup>1</sup>H NMR (400 MHz, CDCl<sub>3</sub>) δ 8.07 (s, 2H), 7.56 (d, *J* = 8.7 Hz, 2H), 7.09 (d, *J* = 8.7 Hz, 2H), 6.95 (s, 2H), 6.09 (t, *J* = 7.1 Hz, 2H), 3.93 (s, 3H), 2.35 (q, *J* = 7.5 Hz, 4H), 1.07 (t, *J* = 7.5 Hz, 6H); <sup>13</sup>C NMR (126 MHz, CDCl<sub>3</sub>) δ 162.4, 147.4, 140.9, 134.8, 132.6, 132.4, 128.2, 125.9, 125.8, 124.7, 114.4, 55.6, 22.5, 13.0. <sup>11</sup>B NMR (128 MHz, CDCl<sub>3</sub>) δ 0.04 (t, *J* = 28.2 Hz); <sup>19</sup>F NMR (376 MHz, CDCl<sub>3</sub>) δ -145.36 (q, *J* = 30.1 Hz). HRMS calcd for C<sub>24</sub>H<sub>23</sub>BCl<sub>2</sub>FN<sub>2</sub>O (M-F)<sup>+</sup> 455.1265, found 455.1269.

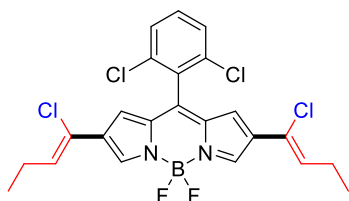

**3i** was prepared in 61% yield (red solid, 62 mg) from BODIPY **1b** (67 mg, 0.2 mmol) and **2a** (0.21 mL, 2 mmol), SnCl<sub>4</sub> (0.026 mL, 0.2 mmol) were dissolved in toluene (2 mL). <sup>1</sup>H NMR (500 MHz, CDCl<sub>3</sub>) δ 8.11 (s, 2H), 7.52-7.44 (m, 3H), 6.63 (s, 2H),

6.09 (t,  $J = 7.1$  Hz, 2H), 2.37-2.31 (m, 4H), 1.06 (t,  $J = 7.6$  Hz, 6H);  $^{13}\text{C}$  NMR (126 MHz,  $\text{CDCl}_3$ )  $\delta$  143.5, 140.9, 135.5, 135.2, 133.8, 131.9, 131.2, 129.3, 128.8, 124.8, 124.4, 22.9, 13.3.  $^{11}\text{B}$  NMR (128 MHz,  $\text{CDCl}_3$ )  $\delta$  0.04 (t,  $J = 26.3$  Hz);  $^{19}\text{F}$  NMR (376 MHz,  $\text{CDCl}_3$ )  $\delta$  -145.69 (q,  $J = 30.1$  Hz). HRMS calcd for  $\text{C}_{23}\text{H}_{19}\text{BCl}_4\text{FN}_2$  ( $\text{M-F}$ ) $^+$  493.0379, found 493.0363.

### General procedure for the synthesis of 4a-g

BODIPY **1** (1 equiv, 0.2 mmol), **2** (6 equiv, 1.2 mmol),  $\text{SnCl}_4$  (1 equiv, 0.2 mmol), were dissolved in toluene (2 mL). The reaction mixture was stirred at room temperature and the reaction was followed by TLC. After completion of the reaction, the reaction mixture was poured into dichloromethane (100 mL), and saturated aqueous  $\text{NaHCO}_3$  (25 mL) was added to remove excess acyl chloride. The organic layer was collected, and was washed three times with water (100 mL), dried over  $\text{Na}_2\text{SO}_4$ , filtered, and evaporated to dryness. The crude product was purified by column chromatographically (silica; petroleum ether/ethyl acetate; 10:1-5:1 v/v).

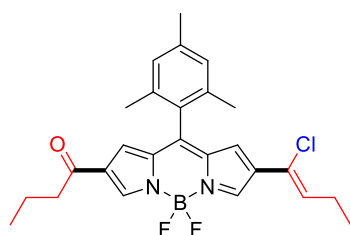

**4a** was prepared in 65% yield (red solid, 60 mg) from BODIPY **1a** (62 mg, 0.2 mmol) and **2a** (0.12 mL, 1.2 mmol),  $\text{SnCl}_4$  (0.026 mL, 0.2 mmol) were dissolved in toluene (2 mL).  $^1\text{H}$  NMR (400 MHz,  $\text{CDCl}_3$ )  $\delta$  8.25 (s, 2H), 6.99 (s, 3H), 6.77 (s, 1H), 6.15 (t,  $J = 7.1$  Hz, 1H), 2.70 (t,  $J = 7.3$  Hz, 2H), 2.39 (s, 3H), 2.39-2.31 (m, 2H), 2.10 (s, 6H), 1.75-1.66 (m, 2H), 1.06 (t,  $J = 7.5$  Hz, 3H), 0.96 (t,  $J = 7.4$  Hz, 3H).  $^{13}\text{C}$  NMR (101 MHz,  $\text{CDCl}_3$ )  $\delta$  194.9, 149.9, 145.7, 142.7, 139.5, 136.9, 136.2, 135.0, 134.8, 132.3, 130.0, 128.7, 128.5, 127.8, 126.2, 124.1, 41.8, 22.6, 21.2, 20.0, 17.8, 13.8, 12.9.  $^{11}\text{B}$  NMR (128 MHz,  $\text{CDCl}_3$ )  $\delta$  0.10 (t,  $J = 28.2$  Hz);  $^{19}\text{F}$  NMR (376 MHz,  $\text{CDCl}_3$ )  $\delta$  -145.57 (q,  $J = 26.3$  Hz). HRMS calcd for  $\text{C}_{26}\text{H}_{29}\text{BClF}_2\text{N}_2\text{O}$  ( $\text{M+H}$ ) $^+$  469.2029, found 469.1992.

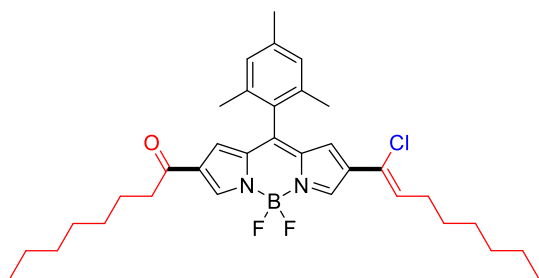

**4b** was prepared in 66% yield (red solid, 76 mg) from BODIPY **1a** (62 mg, 0.2 mmol) and **2b** (0.21 mL, 1.2 mmol), SnCl<sub>4</sub> (0.026 mL, 0.2 mmol) were dissolved in toluene (2 mL). <sup>1</sup>H NMR (500 MHz, CDCl<sub>3</sub>) δ 8.25 (s, 2H), 6.99 (s, 3H), 6.77 (s, 1H), 6.16 (t, *J* = 7.2 Hz, 1H), 2.71 (t, *J* = 7.5 Hz, 2H), 2.39 (s, 3H), 2.39-2.33 (m, 2H), 2.10 (s, 6H), 1.70-1.64 (m, 2H), 1.48-1.42 (m, 2H), 1.34-1.26 (m, 14H), 0.90-0.86 (m, 6H); <sup>13</sup>C NMR (101 MHz, CDCl<sub>3</sub>) δ 195.1, 149.9, 145.7, 142.7, 139.5, 136.9, 136.2, 135.0, 134.9, 134.8, 132.2, 128.8, 128.5, 127.8, 126.2, 124.6, 39.9, 31.7, 31.6, 29.7, 29.3, 29.2, 29.1, 28.9, 28.4, 24.3, 22.6, 22.5, 21.2, 20.0, 14.1. <sup>11</sup>B NMR (128 MHz, CDCl<sub>3</sub>) δ 0.10 (t, *J* = 28.2 Hz); <sup>19</sup>F NMR (376 MHz, CDCl<sub>3</sub>) δ -145.55 (q, *J* = 30.1 Hz). HRMS calcd for C<sub>34</sub>H<sub>45</sub>BClF<sub>2</sub>N<sub>2</sub>O (M+H)<sup>+</sup> 581.3282, found 581.3280.

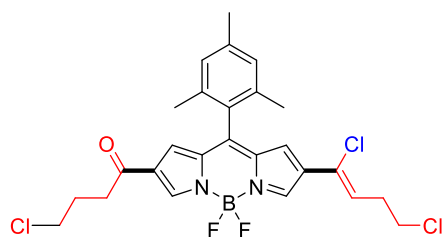

**4c** was prepared in 56% yield (red solid, 53 mg) from BODIPY **1a** (62 mg, 0.2 mmol) and **2c** (0.13 mL, 1.2 mmol), SnCl<sub>4</sub> (0.026 mL, 0.2 mmol) were dissolved in toluene (2 mL). <sup>1</sup>H NMR (500 MHz, CDCl<sub>3</sub>) δ 8.31 (s, 1H), 8.28 (s, 1H), 7.03 (s, 1H), 7.01 (s, 2H), 6.82 (s, 1H), 6.23 (t, *J* = 6.9 Hz, 1H), 3.64-3.61 (m, 4H), 2.94 (t, *J* = 7.1 Hz, 2H), 2.85-2.81 (m, 2H), 2.40 (s, 3H), 2.19-2.14 (m, 2H), 2.11 (s, 6H); <sup>13</sup>C NMR (126 MHz, CDCl<sub>3</sub>) δ 193.7, 151.0, 146.0, 143.4, 140.1, 137.3, 136.5, 135.6, 134.4, 132.5, 132.5, 129.0, 128.5, 127.5, 127.0, 124.0, 44.9, 43.2, 36.9, 32.6, 26.9, 21.6, 20.4. <sup>11</sup>B NMR (128 MHz, CDCl<sub>3</sub>) δ 0.10 (t, *J* = 28.2 Hz); <sup>19</sup>F NMR (376 MHz, CDCl<sub>3</sub>) δ -145.47 (q, *J* = 30.1 Hz). HRMS calcd for C<sub>26</sub>H<sub>27</sub>BCl<sub>3</sub>F<sub>2</sub>N<sub>2</sub>O (M+H)<sup>+</sup> 537.1250, found 537.1239.

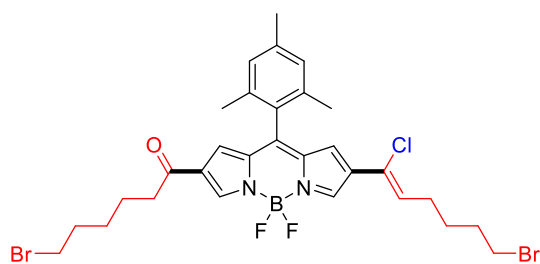

**4d** was prepared in 60% yield (red solid, 81 mg) from BODIPY **1a** (62 mg, 0.2 mmol) and **2d** (0.18 mL, 1.2 mmol), SnCl<sub>4</sub> (0.026 mL, 0.2 mmol) were dissolved in toluene (2 mL). <sup>1</sup>H NMR (500 MHz, CDCl<sub>3</sub>) δ 8.26 (s, 1H), 8.25 (s, 1H), 7.00 (s, 3H), 6.78 (s, 1H), 6.14 (t, *J* = 7.2 Hz, 1H), 3.44-3.39 (m, 4H), 2.75 (d, *J* = 7.4 Hz, 2H), 2.39 (s, 3H), 2.38 (d, *J* = 10.0 Hz, 2H), 2.10 (s, 6H), 1.94-1.85 (m, 4H), 1.74-1.68 (m, 2H), 1.66-1.60 (m, 2H), 1.51-1.47 (m, 2H); <sup>13</sup>C NMR (101 MHz, CDCl<sub>3</sub>) δ 194.4, 150.2, 145.6, 142.8, 139.6, 136.9, 136.1, 135.1, 134.5, 132.2, 128.7, 128.5, 127.9, 127.5, 126.3, 125.3, 39.6, 33.5, 33.3, 32.5, 32.1, 28.2, 27.8, 27.0, 23.2, 21.2, 20.0. <sup>11</sup>B NMR (128 MHz, CDCl<sub>3</sub>) δ 0.09 (t, *J* = 28.2 Hz); <sup>19</sup>F NMR (376 MHz, CDCl<sub>3</sub>) δ -145.51 (q, *J* = 30.1 Hz). HRMS calcd for C<sub>30</sub>H<sub>35</sub>BBBr<sub>2</sub>ClF<sub>2</sub>N<sub>2</sub>O (M+H)<sup>+</sup> 681.0866, found 681.0863.

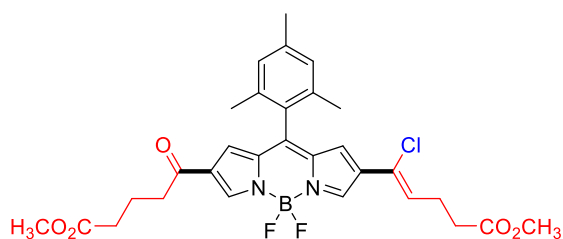

**4e** was prepared in 54% yield (red solid, 64 mg) from BODIPY **1a** (62 mg, 0.2 mmol) and **2e** (0.19 mL, 1.2 mmol), SnCl<sub>4</sub> (0.026 mL, 0.2 mmol) were dissolved in toluene (2 mL). <sup>1</sup>H NMR (400 MHz, CDCl<sub>3</sub>) δ 8.28 (s, 1H), 8.25 (s, 1H), 7.00 (s, 3H), 6.79 (s, 1H), 6.19 (t, *J* = 7.1 Hz, 1H), 3.70-3.69 (m, 3H), 3.67-3.66 (m, 3H), 2.81 (t, *J* = 7.2 Hz, 2H), 2.68-2.63 (m, 2H), 2.49 (t, *J* = 7.1 Hz, 2H), 2.39 (s, 3H), 2.41-2.38 (m, 2H), 2.10 (s, 6H), 2.02-1.98 (m, 2H). <sup>13</sup>C NMR (101 MHz, CDCl<sub>3</sub>) δ 193.8, 173.6, 172.9, 150.3, 145.6, 142.9, 139.6, 136.9, 136.1, 135.1, 134.3, 132.0, 128.6, 128.6, 128.0, 126.5, 126.0, 125.9, 51.8, 51.6, 38.7, 33.0, 32.5, 24.4, 21.2, 20.0, 19.1. <sup>11</sup>B NMR (128 MHz, CDCl<sub>3</sub>) δ 0.08 (t, *J* = 28.2 Hz); <sup>19</sup>F NMR (376 MHz, CDCl<sub>3</sub>) δ -145.53 (q, *J* = 30.1 Hz). HRMS calcd for C<sub>30</sub>H<sub>33</sub>BClF<sub>2</sub>N<sub>2</sub>O<sub>5</sub> (M+H)<sup>+</sup> 585.2139, found 585.2130.

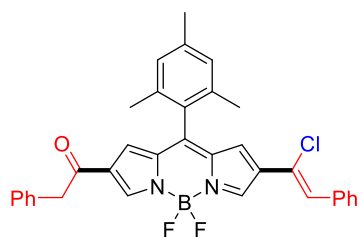

**4f** was prepared in 70% yield (violet solid, 79 mg) from BODIPY **1a** (62 mg, 0.2 mmol) and **2f** (0.16 mL, 1.2 mmol), SnCl<sub>4</sub> (0.026 mL, 0.2 mmol) were dissolved in toluene (2 mL). <sup>1</sup>H NMR (500 MHz, CDCl<sub>3</sub>) δ 8.40 (s, 1H), 8.29 (s, 1H), 7.70 (d, *J* = 7.4 Hz, 2H), 7.41-7.38 (m, 2H), 7.33-7.30 (m, 4H), 7.24-7.22 (m, 2H), 7.06 (s, 1H), 7.04 (s, 1H), 7.01 (s, 2H), 6.92 (s, 1H), 4.03 (s, 2H), 2.40 (s, 3H), 2.10 (s, 6H). <sup>13</sup>C NMR (101 MHz, CDCl<sub>3</sub>) δ 191.9, 150.3, 145.9, 143.4, 139.7, 137.0, 136.2, 13.0, 135.7, 135.2, 134.2, 134.1, 131.8, 129.6, 129.4, 128.8, 128.6, 128.6, 128.6, 128.5, 127.1, 126.5, 125.6, 123.5, 47.0, 21.2, 20.1. <sup>11</sup>B NMR (128 MHz, CDCl<sub>3</sub>) δ 0.11 (t, *J* = 28.2 Hz); <sup>19</sup>F NMR (376 MHz, CDCl<sub>3</sub>) δ -145.42 (q, *J* = 30.1 Hz). HRMS calcd for C<sub>34</sub>H<sub>28</sub>BClF<sub>2</sub>N<sub>2</sub>O (M+H)<sup>+</sup> 565.2029, found 565.2001.

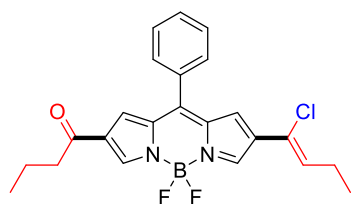

**4g** was prepared in 63% yield (red solid, 53 mg) from BODIPY **1b** (54 mg, 0.2 mmol) and **2a** (0.12 mL, 1.2 mmol), SnCl<sub>4</sub> (0.026 mL, 0.2 mmol) were dissolved in toluene (2 mL). <sup>1</sup>H NMR (400 MHz, CDCl<sub>3</sub>) δ 8.29 (s, 1H), 8.27 (s, 1H), 7.67 -7.58 (m, 5H), 7.27 (s, 1H), 7.04 (s, 1H), 6.18 (t, *J* = 7.1 Hz, 1H), 2.75 (t, *J* = 7.3 Hz, 2H), 2.41-2.33 (m, 2H), 1.76-1.70 (m, 2H), 1.08 (t, *J* = 7.5 Hz, 3H), 0.97 (t, *J* = 7.4 Hz, 3H); <sup>13</sup>C NMR (126 MHz, CDCl<sub>3</sub>) δ 194.9, 149.2, 145.3, 142.6, 136.1, 134.6, 132.9, 132.3, 132.2, 131.5, 130.5, 129.9, 129.5, 128.9, 127.8, 124.1, 41.9, 22.6, 17.8, 13.9, 12.9. <sup>11</sup>B NMR (128 MHz, CDCl<sub>3</sub>) δ 0.07 (t, *J* = 28.2 Hz); <sup>19</sup>F NMR (376 MHz, CDCl<sub>3</sub>) δ -145.03 (q, *J* = 26.3 Hz). HRMS calcd for C<sub>23</sub>H<sub>23</sub>BClF<sub>2</sub>N<sub>2</sub>O (M+H)<sup>+</sup> 427.1555, found 427.1574.

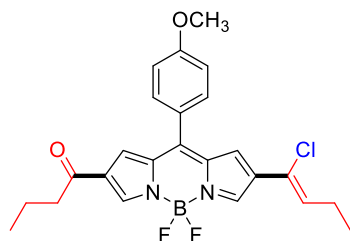

**4h** was prepared in 58% yield (red solid, 52 mg) from BODIPY **1b** (67 mg, 0.2 mmol) and **2a** (0.12 mL, 1.2 mmol), SnCl<sub>4</sub> (0.026 mL, 0.2 mmol) were dissolved in toluene (2 mL). <sup>1</sup>H NMR (400 MHz, CDCl<sub>3</sub>) δ 8.26 (s, 1H), 8.23 (s, 1H), 7.58 (d, *J* = 8.7 Hz, 2H), 7.32 (s, 1H), 7.09 (d, *J* = 8.7 Hz, 2H), 6.17 (t, *J* = 7.1 Hz, 1H), 3.94 (s, 3H), 2.75 (t, *J* = 7.3 Hz, 2H), 2.41-2.34 (m, 2H), 1.78-1.69 (m, 2H), 1.08 (t, *J* = 7.5 Hz, 3H), 0.98 (t, *J* = 7.4 Hz, 3H); <sup>13</sup>C NMR (126 MHz, CDCl<sub>3</sub>) δ 195.01, 162.8, 149.3, 144.2, 141.9, 135.8, 134.5, 134.3, 132.6, 132.1, 129.6, 129.2, 127.7, 125.5, 124.3, 114.6, 55.7, 41.9, 22.6, 17.9, 13.9, 13.0. <sup>11</sup>B NMR (128 MHz, CDCl<sub>3</sub>) δ 0.06 (t, *J* = 28.2 Hz); <sup>19</sup>F NMR (376 MHz, CDCl<sub>3</sub>) δ -145.08 (q, *J* = 30.1 Hz). HRMS calcd for C<sub>24</sub>H<sub>25</sub>BClF<sub>2</sub>N<sub>2</sub>O<sub>2</sub> [M+H]<sup>+</sup>: 457.1660, found 457.1667.

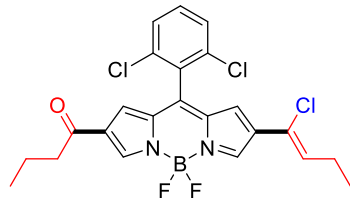

**4i** was prepared in 64% yield (red solid, 63 mg) from BODIPY **1b** (67 mg, 0.2 mmol) and **2a** (0.12 mL, 1.2 mmol), SnCl<sub>4</sub> (0.026 mL, 0.2 mmol) were dissolved in toluene (2 mL). <sup>1</sup>H NMR (400 MHz, CDCl<sub>3</sub>) δ 8.31 (s, 1H), 8.27 (s, 1H), 7.54-7.46 (m, 3H), 7.01 (s, 1H), 6.77 (s, 1H), 6.19 (t, *J* = 7.1 Hz, 1H), 2.72 (t, *J* = 8.0 Hz, 2H), 2.40-2.33 (m, 2H), 1.76-1.67 (m, 2H), 1.08 (t, *J* = 7.5 Hz, 3H), 0.97 (t, *J* = 7.4 Hz, 3H); <sup>13</sup>C NMR (126 MHz, CDCl<sub>3</sub>) δ 195.1, 147.6, 143.8, 142.9, 137.0, 135.8, 135.3, 134.5, 132.8, 132.2, 131.1, 130.7, 128.9, 127.8, 126.2, 124.4, 42.3, 23.0, 18.1, 14.2, 13.3. <sup>11</sup>B NMR (128 MHz, CDCl<sub>3</sub>) δ 0.08 (t, *J* = 28.2 Hz); <sup>19</sup>F NMR (376 MHz, CDCl<sub>3</sub>) δ -145.31 (q, *J* = 26.3 Hz). HRMS calcd for C<sub>23</sub>H<sub>21</sub>BCl<sub>3</sub>F<sub>2</sub>N<sub>2</sub>O (M+H)<sup>+</sup> 495.0781, found 495.0762.

### synthesis of 5

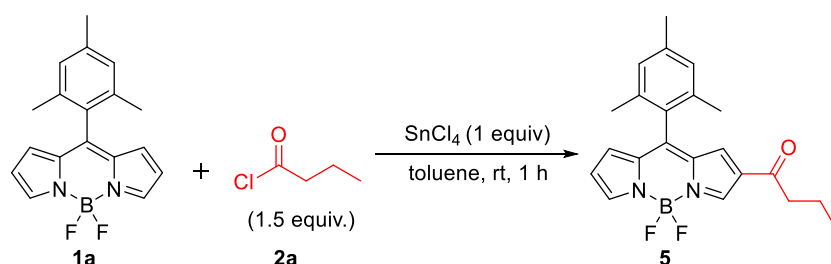

BODIPY **1a** (60 mg, 0.2 mmol), butyryl chloride **2a** (0.031 mL, 0.3 mmol), and  $\text{SnCl}_4$  (0.026 mL, 0.2 mmol) were dissolved in dichloromethane (2 mL). The reaction mixture was stirred at room temperature and the reaction was followed by TLC. After completion of the reaction, the reaction mixture was poured into dichloromethane (100 mL), and saturated aqueous  $\text{NaHCO}_3$  (25 mL) was added to remove excess butyryl chloride. The organic layer was collected, and was washed three times with water (100 mL), dried over  $\text{Na}_2\text{SO}_4$ , filtered, and evaporated to dryness. The crude product was purified by column chromatographically (silica; petroleum ether/ethyl acetate; 5:1 v/v) to provide **5** in 56 % yield (orange oil, 42 mg).  $^1\text{H}$  NMR (400 MHz,  $\text{CDCl}_3$ )  $\delta$  8.27 (s, 1H), 8.10 (s, 1H), 7.02 (s, 1H), 6.98 (s, 2H), 6.86 (d,  $J = 4.3$  Hz, 1H), 6.61 (d,  $J = 4.3$  Hz, 1H), 2.71 (t,  $J = 7.4$  Hz, 2H), 2.38 (s, 3H), 2.09 (s, 6H), 1.76-1.64 (m, 2H), 0.96 (t,  $J = 8.0$  Hz, 3H);  $^{13}\text{C}$  NMR (101 MHz,  $\text{CDCl}_3$ )  $\delta$  195.1, 149.9, 148.6, 142.4, 139.4, 137.3, 136.1, 134.7, 132.9, 132.1, 128.9, 128.4, 127.6, 120.9, 41.8, 21.2, 19.9, 17.8, 13.9.  $^{11}\text{B}$  NMR (128 MHz,  $\text{CDCl}_3$ )  $\delta$  0.21 (t,  $J = 28.2$  Hz);  $^{19}\text{F}$  NMR (376 MHz,  $\text{CDCl}_3$ )  $\delta$  -145.52 (q,  $J = 30.1$  Hz). HRMS calcd for  $\text{C}_{22}\text{H}_{24}\text{BF}_2\text{N}_2\text{O}$   $[\text{M}+\text{H}]^+$ :381.1944, found 381.1958.

### synthesis of 6

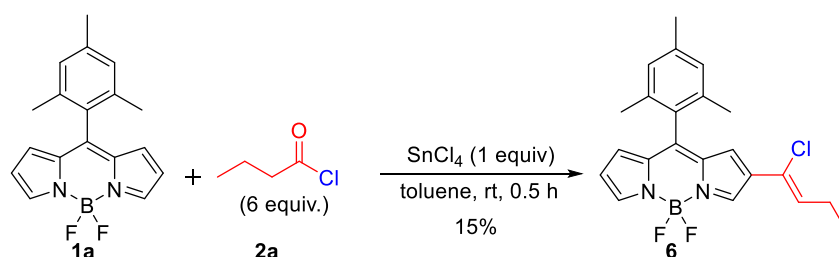

BODIPY **1** (1 equiv, 0.2 mmol), **2a** (6 equiv, 1.2 mmol),  $\text{SnCl}_4$  (1 equiv, 0.2 mmol), were dissolved in toluene (2 mL). The reaction mixture was stirred at room temperature for 0.5 h. The reaction mixture was poured into dichloromethane (100 mL), and saturated aqueous  $\text{NaHCO}_3$  (25 mL) was added to remove excess acyl



chloride. The organic layer was collected, and was washed three times with water (100 mL), dried over Na<sub>2</sub>SO<sub>4</sub>, filtered, and evaporated to dryness. The crude product was purified by column chromatographically (silica; petroleum ether/ethyl acetate; 50:1 v/v) to provide **5** in 15 % yield (red solid, 11 mg). <sup>1</sup>H NMR (400 MHz, CDCl<sub>3</sub>) δ 8.06 (s, 1H), 7.92 (s, 1H), 6.97 (s, 2H), 6.68 (d, *J* = 4.2 Hz, 1H), 6.64 (s, 1H), 6.48 (d, *J* = 3.4 Hz, 1H), 6.05 (t, *J* = 7.1 Hz, 1H), 2.37 (s, 3H), 2.36-2.29 (m, 2H), 2.11 (s, 6H), 1.05 (t, *J* = 7.6 Hz, 3H); <sup>13</sup>C NMR (101 MHz, CDCl<sub>3</sub>) δ 147.8, 144.9, 141.3, 139.0, 136.3, 135.9, 135.0, 132.6, 130.5, 129.4, 128.3, 128.1, 124.6, 124.2, 118.9, 22.4, 21.2, 20.0, 13.0. <sup>11</sup>B NMR (128 MHz, CDCl<sub>3</sub>) δ 0.19 (t, *J* = 28.2 Hz); <sup>19</sup>F NMR (376 MHz, CDCl<sub>3</sub>) δ -145.78 (q, *J* = 30.1 Hz). HRMS calcd for C<sub>22</sub>H<sub>22</sub>BClFN<sub>2</sub> (M-F)<sup>+</sup> 379.1549, found 379.1530.

### synthesis of **6** from **5**

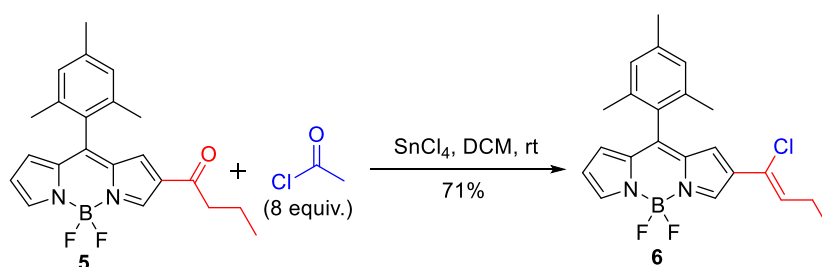

BODIPY **5** (38 mg, 0.1 mmol), acetyl chloride (0.056 mL, 0.8 mmol), SnCl<sub>4</sub> (0.013 mL, 0.1 mmol), were dissolved in dichloromethane (2 mL). The reaction mixture was stirred at room temperature and the reaction was followed by TLC. After completion of the reaction, the reaction mixture was poured into dichloromethane (100 mL), and saturated aqueous NaHCO<sub>3</sub> (25 mL) was added to remove excess acetyl chloride. The organic layer was collected, and was washed three times with water (100 mL), dried over Na<sub>2</sub>SO<sub>4</sub>, filtered, and evaporated to dryness. The crude product was purified by column chromatographically (silica; petroleum ether/ethyl acetate; 20:1 v/v) to provide **6** in 71% yield (red solid, 26 mg).

### synthesis of 3a from 4a

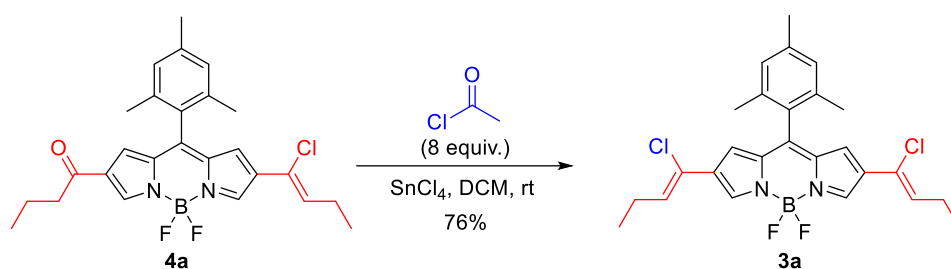

BODIPY **4a** (47 mg, 0.1 mmol), acetyl chloride (0.056 mL, 0.8 mmol),  $\text{SnCl}_4$  (0.013 mL, 0.1 mmol), were dissolved in dichloromethane (2 mL). The reaction mixture was stirred at room temperature and the reaction was followed by TLC. After completion of the reaction, the reaction mixture was poured into dichloromethane (100 mL), and saturated aqueous  $\text{NaHCO}_3$  (25 mL) was added to remove excess acetyl chloride. The organic layer was collected, and was washed three times with water (100 mL), dried over  $\text{Na}_2\text{SO}_4$ , filtered, and evaporated to dryness. The crude product was purified by column chromatographically (silica; petroleum ether/ethyl acetate; 30:1 v/v) to provide **3a** in 76 % yield (red solid, 36 mg).

### synthesis of 7 from 5

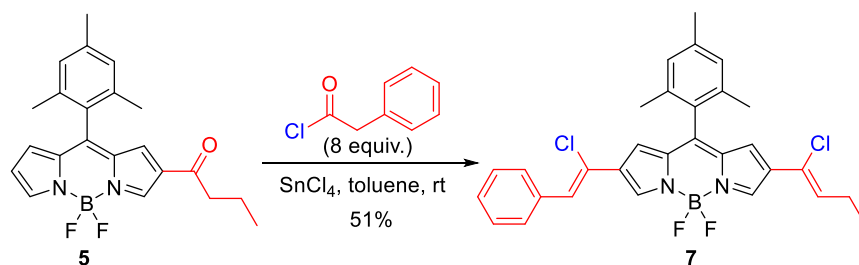

BODIPY **5** (38 mg, 0.1 mmol), phenylacetyl chloride (0.11 mL, 0.8 mmol),  $\text{SnCl}_4$  (0.013 mL, 0.1 mmol), were dissolved in toluene (1 mL). The reaction mixture was stirred at room temperature and the reaction was followed by TLC. After completion of the reaction, the reaction mixture was poured into dichloromethane (100 mL), and saturated aqueous  $\text{NaHCO}_3$  (25 mL) was added to remove excess phenylacetyl chloride. The organic layer was collected, and was washed three times with water (100 mL), dried over  $\text{Na}_2\text{SO}_4$ , filtered, and evaporated to dryness. The crude product was purified by column chromatographically (silica; petroleum ether/ethyl acetate; 30:1 v/v) to provide **7** in 55 % yield (violet solid, 54 mg).  $^1\text{H}$  NMR (400 MHz,  $\text{CDCl}_3$ )  $\delta$  8.21 (s, 1H), 8.12 (s, 1H), 7.68 (d,  $J = 7.5$  Hz, 2H), 7.39-7.35 (m, 2H), 7.31-7.29 (m,

1H), 7.01 (s, 2H), 6.98 (s, 1H), 6.77 (s, 1H), 6.67 (s, 1H), 6.08 (t,  $J = 7.1$  Hz, 1H), 2.40 (s, 3H), 2.37-2.30 (m, 2H), 2.15 (s, 6H), 1.06 (t,  $J = 7.5$  Hz, 3H);  $^{13}\text{C}$  NMR (101 MHz,  $\text{CDCl}_3$ )  $\delta$  147.9, 142.8, 141.9, 139.3, 136.3, 135.8, 135.5, 134.6, 133.6, 133.3, 129.5, 129.1, 128.7, 128.4, 128.3, 128.2, 124.8, 124.5, 124.4, 124.2, 124.1, 22.5, 21.2, 20.1, 13.0.  $^{11}\text{B}$  NMR (128 MHz,  $\text{CDCl}_3$ )  $\delta$  0.09 (t,  $J = 28.2$  Hz);  $^{19}\text{F}$  NMR (376 MHz,  $\text{CDCl}_3$ )  $\delta$  -145.81 (q,  $J = 30.1$  Hz). HRMS calcd for  $\text{C}_{30}\text{H}_{27}\text{BCl}_2\text{FN}_2$  (M-F) $^+$  515.1628, found 515.1653.

### synthesis of 3d-p from 3d

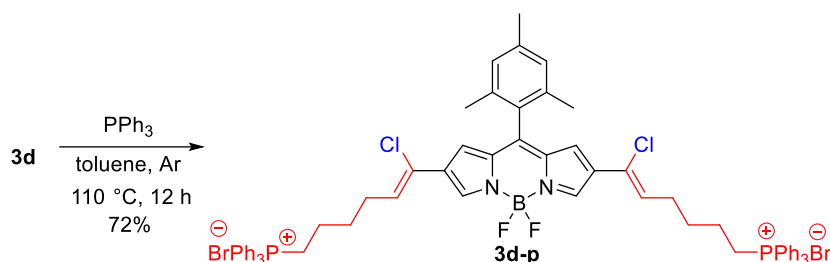

BODIPY **3d** (70 mg, 0.1 mmol) and triphenylphosphine (263.0 mg, 1.0 mmol) were dissolved in 5 mL toluene. The mixture was heated at  $110\text{ }^\circ\text{C}$  for 12 h under argon atmosphere. Upon completion, the mixture was then cooled to room temperature. The precipitate was collected and was washed with toluene until the triphenylphosphine was completely removed. The crude product was dissolved in a 1 mL dichloromethane solution and was layered with petroleum ether to give brown powder **3d-p** in 60% yield (violet solid, 73 mg).  $^1\text{H}$  NMR (400 MHz,  $\text{CDCl}_3$ )  $\delta$  7.97 (s, 2H), 7.82 -7.67 (m, 30H), 7.01 (s, 2H), 6.61 (s, 2H), 5.99 (t,  $J = 7.2$  Hz, 2H), 3.87-3.80 (m, 4H), 2.38 (s, 3H), 2.36 -2.32 (m, 4H), 2.11 (s, 6H), 1.94 -1.87 (m, 4H), 1.69-1.58 (m, 4H).  $^{13}\text{C}$  NMR (101 MHz,  $\text{CDCl}_3$ )  $\delta$  148.3, 142.2, 139.4, 135.1, 135.0, 133.7, 133.6, 130.6, 130.4, 128.6, 126.0, 125.5, 124.5, 118.7, 117.8, 22.6, 22.1, 22.0, 21.9, 21.2, 20.1.  $^{11}\text{B}$  NMR (128 MHz,  $\text{CDCl}_3$ )  $\delta$  0.06 (t,  $J = 28.2$  Hz);  $^{19}\text{F}$  NMR (376 MHz,  $\text{CDCl}_3$ )  $\delta$  -145.71 (q,  $J = 30.1$  Hz). HRMS (ESI)  $m/z$  calcd for  $\text{C}_{66}\text{H}_{63}\text{BBBrCl}_2\text{F}_2\text{N}_2\text{P}_2^+$  (M-Br) $^+$  1145.30621, found 1145.30835.

## 5. Crystal data

**Table S3. Selected Geometrical Parameters of 3c and 3i obtained from crystallography**

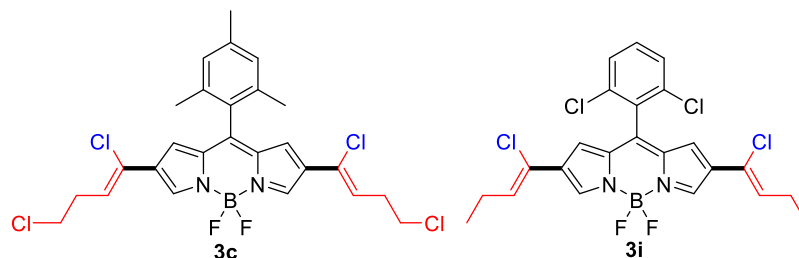

|                                                                | <b>3c</b>   | <b>3i</b>    |
|----------------------------------------------------------------|-------------|--------------|
| B-N bond lengths (Å)                                           | 1.5462 (42) | 1.5466 (36)  |
| C=C bond lengths of alkenyl units (Å)                          | 1.3201 (71) | 1.3048 (47)  |
| C-Cl bond lengths of alkenyl units (Å)                         | 1.7575 (42) | 1.7425 (403) |
| dihedral angles of two pyrrole rings in dipyrrolyne core (deg) | 4.705(156)  | 2.995(117)   |
| dihedral angles of alkenyl units and dipyrrolyne core (deg)    | 20.048(141) | 21.114(66)   |
|                                                                | 20.048(160) | 20.964(745)  |

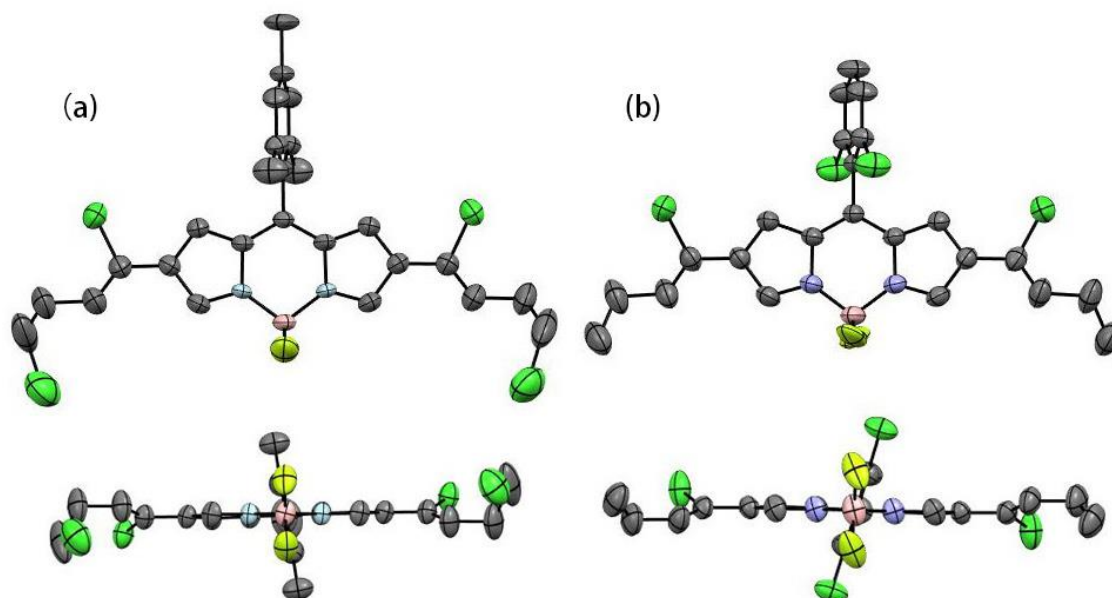

**Figure S2.** Top and front views of X-Ray structures of **3c** (a) and **3i** (b).

|                                             |                                                                                |
|---------------------------------------------|--------------------------------------------------------------------------------|
| Compound name                               | <b>3c</b>                                                                      |
| CCDC number                                 | 2418848                                                                        |
| Empirical formula                           | C <sub>26</sub> H <sub>25</sub> BCl <sub>4</sub> F <sub>2</sub> N <sub>2</sub> |
| Formula weight                              | 556.09                                                                         |
| Temperature/K                               | 293(2)                                                                         |
| Crystal system                              | orthorhombic                                                                   |
| Space group                                 | Pbcn                                                                           |
| a/Å                                         | 16.744                                                                         |
| b/Å                                         | 17.965                                                                         |
| c/Å                                         | 9.147                                                                          |
| α/°                                         | 90                                                                             |
| β/°                                         | 90                                                                             |
| γ/°                                         | 90                                                                             |
| Volume/Å <sup>3</sup>                       | 2751.6                                                                         |
| Z                                           | 4                                                                              |
| ρ <sub>calc</sub> /cm <sup>3</sup>          | 1.342                                                                          |
| μ/mm <sup>-1</sup>                          | 0.462                                                                          |
| F(000)                                      | 1144.0                                                                         |
| Crystal size/mm <sup>3</sup>                | 0.22 × 0.21 × 0.2                                                              |
| Radiation                                   | MoKα (λ = 0.71076)                                                             |
| 2θ range for data collection/°              | 6.358 to 50.698                                                                |
| Index ranges                                | -20 ≤ h ≤ 20, -21 ≤ k ≤ 21, -11 ≤ l ≤ 11                                       |
| Reflections collected                       | 109216                                                                         |
| Independent reflections                     | 2508 [R <sub>int</sub> = 0.0361, R <sub>sigma</sub> = 0.0080]                  |
| Data/restraints/parameters                  | 2508/16/163                                                                    |
| Goodness-of-fit on F <sup>2</sup>           | 1.036                                                                          |
| Final R indexes [I ≥ 2σ (I)]                | R <sub>1</sub> = 0.0875, wR <sub>2</sub> = 0.2541                              |
| Final R indexes [all data]                  | R <sub>1</sub> = 0.1007, wR <sub>2</sub> = 0.2792                              |
| Largest diff. peak/hole / e Å <sup>-3</sup> | 1.49/-0.65                                                                     |

|                                   |                                                                                |          |
|-----------------------------------|--------------------------------------------------------------------------------|----------|
| Compound name                     | <b>3i</b>                                                                      |          |
| CCDC number                       | 2010636                                                                        |          |
| Empirical formula                 | C <sub>23</sub> H <sub>19</sub> BCl <sub>4</sub> F <sub>2</sub> N <sub>2</sub> |          |
| Formula weight                    | 514.01                                                                         |          |
| Temperature                       | 293.15 K                                                                       |          |
| Wavelength                        | 0.71073 Å                                                                      |          |
| Crystal system                    | Orthorhombic                                                                   |          |
| Space group                       | Pbcn                                                                           |          |
| Unit cell dimensions              | a = 14.694(3) Å                                                                | α = 90 ° |
|                                   | b = 16.305(3) Å                                                                | β = 90 ° |
|                                   | c = 9.870(2) Å                                                                 | γ = 90 ° |
| Volume                            | 2364.7(8) Å <sup>3</sup>                                                       |          |
| Z                                 | 4                                                                              |          |
| Density (calculated)              | 1.444 Mg/m <sup>3</sup>                                                        |          |
| Absorption coefficient            | 0.531 mm <sup>-1</sup>                                                         |          |
| F(000)                            | 1048                                                                           |          |
| Crystal size                      | 0.05 x 0.04 x 0.03 mm <sup>3</sup>                                             |          |
| Theta range for data collection   | 3.241 to 27.489 °                                                              |          |
| Index ranges                      | -18 ≤ h ≤ 18, -21 ≤ k ≤ 20, -11 ≤ l ≤ 12                                       |          |
| Reflections collected             | 37155                                                                          |          |
| Independent reflections           | 2682 [R(int) = 0.0807]                                                         |          |
| Completeness to theta = 25.242°   | 99.7 %                                                                         |          |
| Absorption correction             | Semi-empirical from equivalents                                                |          |
| Max. and min. transmission        | 0.7455 and 0.6813                                                              |          |
| Refinement method                 | Full-matrix least-squares on F <sup>2</sup>                                    |          |
| Data / restraints / parameters    | 2682 / 2 / 161                                                                 |          |
| Goodness-of-fit on F <sup>2</sup> | 1.062                                                                          |          |
| Final R indices [I > 2σ(I)]       | R1 = 0.0574, wR2 = 0.1491                                                      |          |
| R indices (all data)              | R1 = 0.0900, wR2 = 0.1680                                                      |          |
| Extinction coefficient            | n/a                                                                            |          |
| Largest diff. peak and hole       | 0.920 and -0.687 e Å <sup>-3</sup>                                             |          |

## 6. Spectroscopic properties

### 6.1. Table S4: Selected Photophysical Data of BODIPYs in Dichloromethane.

| BODIPYs     | $\lambda_{\text{abs}}^{\text{max}}$ (nm) | $\lambda_{\text{em}}^{\text{max}}$ (nm) | $\epsilon_{\text{abs}}^{\text{max}}$<br>[M <sup>-1</sup> cm <sup>-1</sup> ] <sup>a</sup> | $\Phi^{\text{b,c}}$ | Stokes Shift (cm <sup>-1</sup> ) <sup>c</sup> |
|-------------|------------------------------------------|-----------------------------------------|------------------------------------------------------------------------------------------|---------------------|-----------------------------------------------|
| <b>1a</b>   | 500                                      | 522                                     | 54100                                                                                    | 0.74 <sup>c</sup>   | 840                                           |
| <b>3a</b>   | 584                                      | 619                                     | 39500                                                                                    | 0.26 <sup>b</sup>   | 970                                           |
| <b>3b</b>   | 576                                      | 609                                     | 48600                                                                                    | 0.35 <sup>b</sup>   | 960                                           |
| <b>3c</b>   | 581                                      | 616                                     | 36000                                                                                    | 0.24 <sup>b</sup>   | 1060                                          |
| <b>3d</b>   | 581                                      | 616                                     | 47600                                                                                    | 0.26 <sup>b</sup>   | 980                                           |
| <b>3e</b>   | 587                                      | 622                                     | 37200                                                                                    | 0.23 <sup>b</sup>   | 960                                           |
| <b>3f</b>   | 609                                      | 662                                     | 48300                                                                                    | 0.06 <sup>b</sup>   | 1310                                          |
| <b>3g</b>   | 583                                      | 625                                     | 36300                                                                                    | 0.09 <sup>b</sup>   | 1150                                          |
| <b>3h</b>   | 579                                      | 619                                     | 30300                                                                                    | 0.08 <sup>b</sup>   | 1120                                          |
| <b>3i</b>   | 605                                      | 642                                     | 37200                                                                                    | 0.29 <sup>b</sup>   | 1020                                          |
| <b>4a</b>   | 536                                      | 593                                     | 34000                                                                                    | 0.28 <sup>b</sup>   | 1130                                          |
| <b>4b</b>   | 544                                      | 579                                     | 43000                                                                                    | 0.38 <sup>b</sup>   | 1110                                          |
| <b>4c</b>   | 535                                      | 588                                     | 25800                                                                                    | 0.34 <sup>b</sup>   | 1150                                          |
| <b>4d</b>   | 535                                      | 586                                     | 26800                                                                                    | 0.37 <sup>b</sup>   | 1120                                          |
| <b>4e</b>   | 537                                      | 593                                     | 32100                                                                                    | 0.33 <sup>b</sup>   | 1020                                          |
| <b>4f</b>   | 552                                      | 647                                     | 46700                                                                                    | 0.08 <sup>b</sup>   | 1330                                          |
| <b>4g</b>   | 535                                      | 604                                     | 36400                                                                                    | 0.12 <sup>b</sup>   | 1270                                          |
| <b>4h</b>   | 532                                      | 600                                     | 34900                                                                                    | 0.09 <sup>b</sup>   | 1140                                          |
| <b>4i</b>   | 546                                      | 611                                     | 27700                                                                                    | 0.36 <sup>b</sup>   | 1380                                          |
| <b>5</b>    | 501                                      | 514                                     | 64300                                                                                    | 0.76 <sup>c</sup>   | 760                                           |
| <b>6</b>    | 539                                      | 586                                     | 32200                                                                                    | 0.35 <sup>b</sup>   | 1180                                          |
| <b>7</b>    | 594                                      | 643                                     | 46400                                                                                    | 0.09 <sup>b</sup>   | 1260                                          |
| <b>3d-p</b> | 580                                      | 611                                     | 42100                                                                                    | 0.24 <sup>b</sup>   | 960                                           |

<sup>a</sup>Molar absorption coefficient values rounded to the nearest 100 M<sup>-1</sup> cm<sup>-1</sup>.

Fluorescence quantum yields determined using Rhodamine B ( $\Phi = 0.49$  in ethanol)<sup>b</sup> or Fluorescein ( $\Phi = 0.90$  in 0.1 M NaOH solution)<sup>c</sup> as reference.

<sup>c</sup>Stokes shift values rounded to nearest 10 cm<sup>-1</sup>.

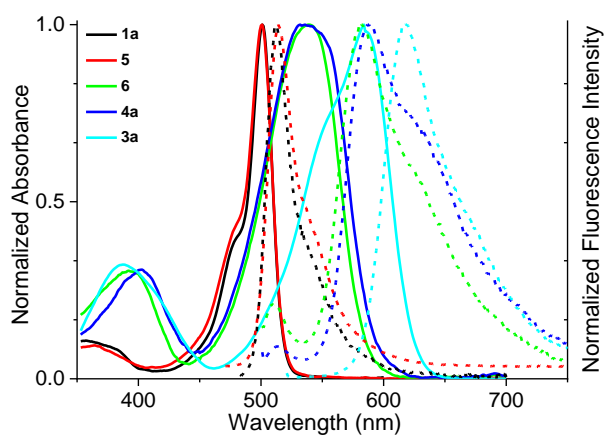

**Figure S3.** Overlaid normalized absorption (solid lines) and fluorescence (dashed lines) spectra of dyes in dichloromethane.

**6.2. Table S5: Photophysical properties of BODIPY 3d-p in different solvents at room temperature**

| solvent            | $\lambda_{\text{abs}}^{\text{max}}$ (nm) | $\epsilon_{\text{abs}}^{\text{max}}$<br>[M <sup>-1</sup> cm <sup>-1</sup> ] <sup>a</sup> | $\lambda_{\text{em}}^{\text{max}}$ (nm) | $\Phi^{\text{b}}$ | Stokes shift (cm <sup>-1</sup> ) <sup>c</sup> |
|--------------------|------------------------------------------|------------------------------------------------------------------------------------------|-----------------------------------------|-------------------|-----------------------------------------------|
| cyclohexane        | 595                                      | 36000                                                                                    | 633                                     | 0.16              | 1000                                          |
| CH <sub>3</sub> CN | 570                                      | 42700                                                                                    | 613                                     | 0.22              | 1230                                          |
| THF                | 578                                      | 41900                                                                                    | 617                                     | 0.18              | 1090                                          |
| toluene            | 584                                      | 45300                                                                                    | 622                                     | 0.20              | 1150                                          |
| MeOH               | 572                                      | 40700                                                                                    | 611                                     | 0.19              | 1120                                          |
| DMSO               | 582                                      | 47700                                                                                    | 623                                     | 0.23              | 1110                                          |

<sup>a</sup>Molar absorption coefficient values rounded to the nearest 100 M<sup>-1</sup> cm<sup>-1</sup>.

<sup>b</sup>Fluorescence quantum yields determined using Rhodamine B ( $\Phi = 0.49$  in ethanol) as reference.

<sup>c</sup>Stokes shift values rounded to nearest 10 cm<sup>-1</sup>.

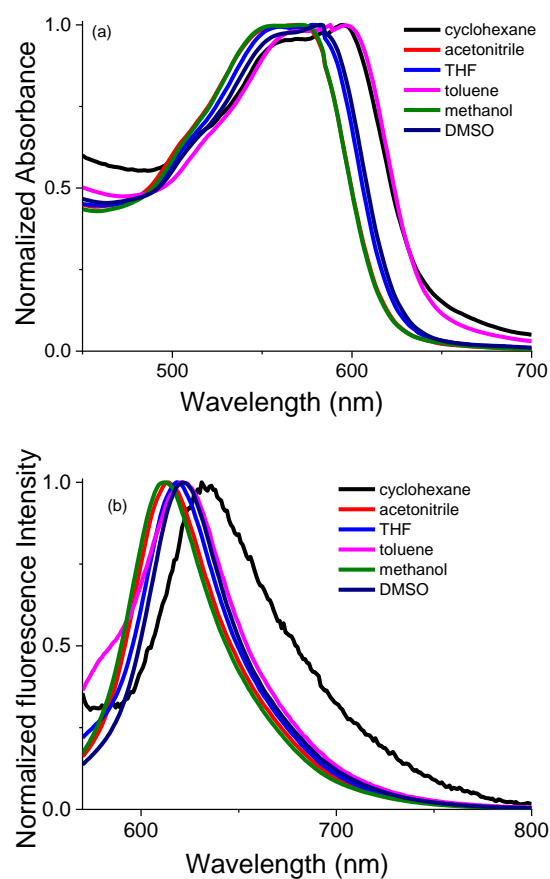

**Figure S4.** Overlaid normalized absorption (a) and fluorescence emission (b) spectra of BODIPYs **3d-p** recorded in different solvents (excitation at 550 nm).



## 7. UV-Vis absorption and fluorescence emission spectra in CH<sub>2</sub>Cl<sub>2</sub>.

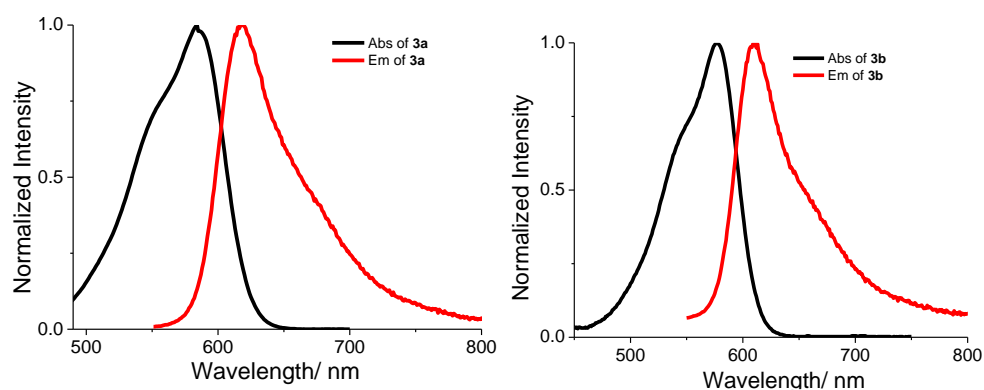

Figure S5. Absorption and fluorescence emission (right) spectra of **3a** (left) and **3b** (right) recorded in dichloromethane (excitation at 550 nm).

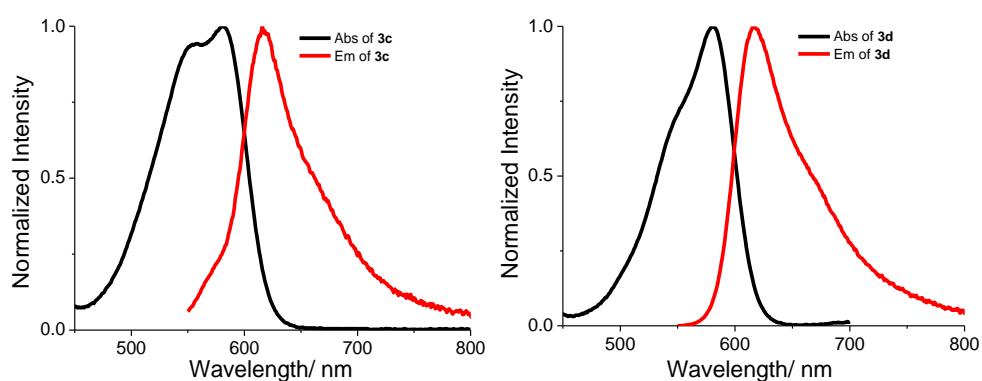

Figure S6. Absorption and fluorescence emission (right) spectra of **3c** (left) and **3d** (right) recorded in dichloromethane (excitation at 550 nm).

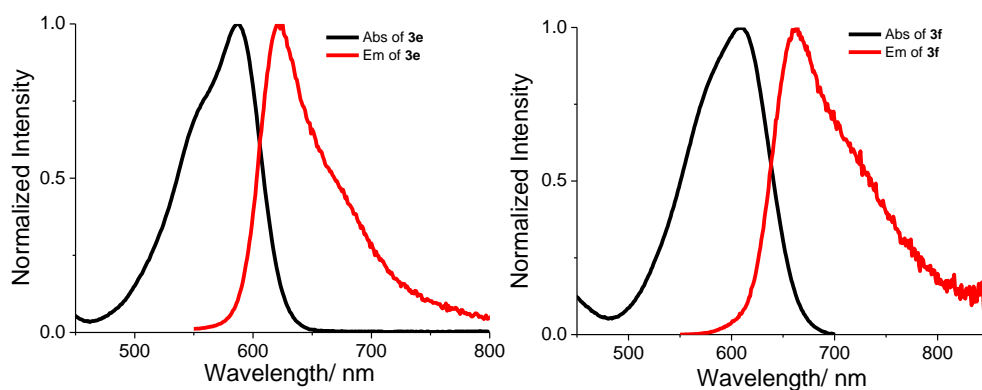

Figure S7. Absorption and fluorescence emission (right) spectra of **3e** (left) and **3f** (right) recorded in dichloromethane (excitation at 550 nm).

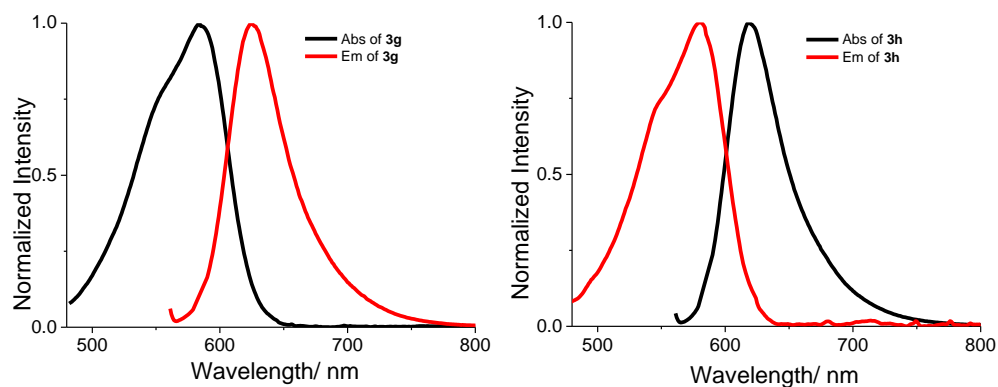

Figure S8. Absorption and fluorescence emission (right) spectra of **3g** (left) and **3h** (right) recorded in dichloromethane (excitation at 550 nm).

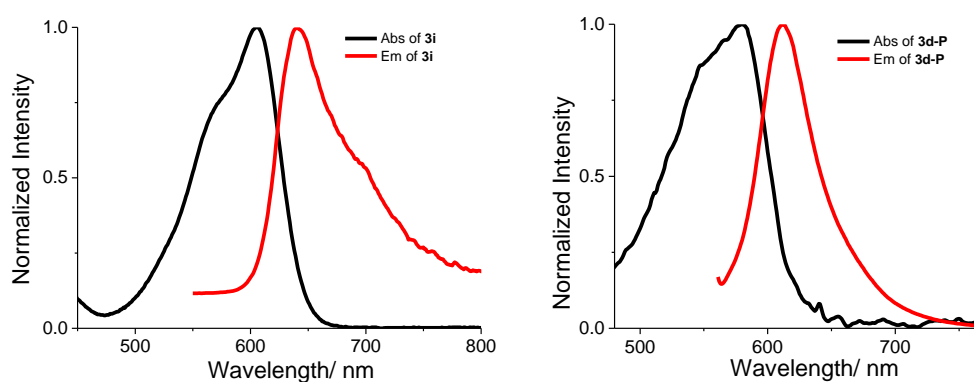

Figure S9. Absorption and fluorescence emission (right) spectra of **3i** (left) and **3d-p** (right) recorded in dichloromethane (excitation at 550 nm).

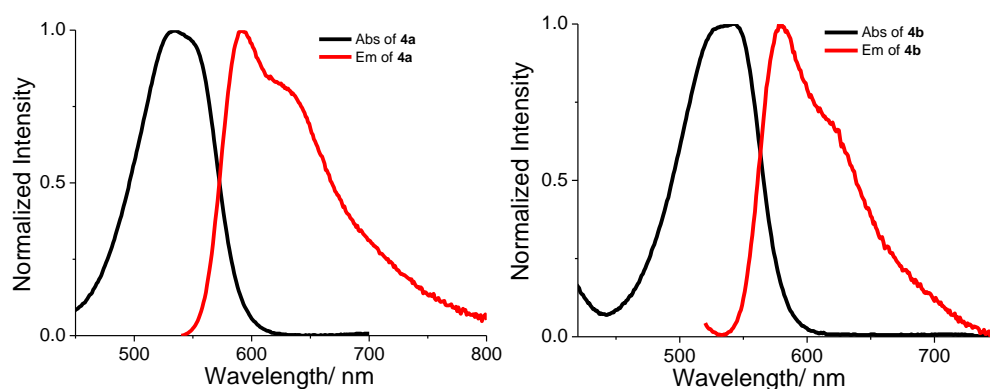

Figure S10. Absorption and fluorescence emission (right) spectra of **4a** (left) and **4b** (right) recorded in dichloromethane (excitation at 520 nm).

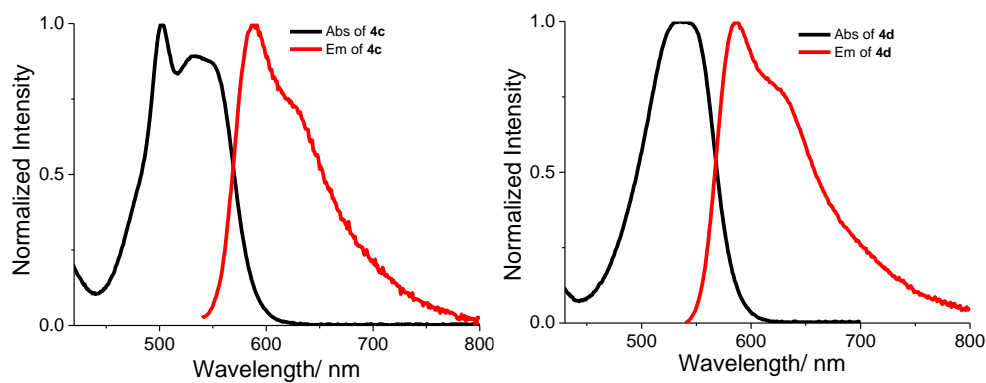

Figure S11. Absorption and fluorescence emission (right) spectra of **4c** (left) and **4d** (right) recorded in dichloromethane (excitation at 520 nm).

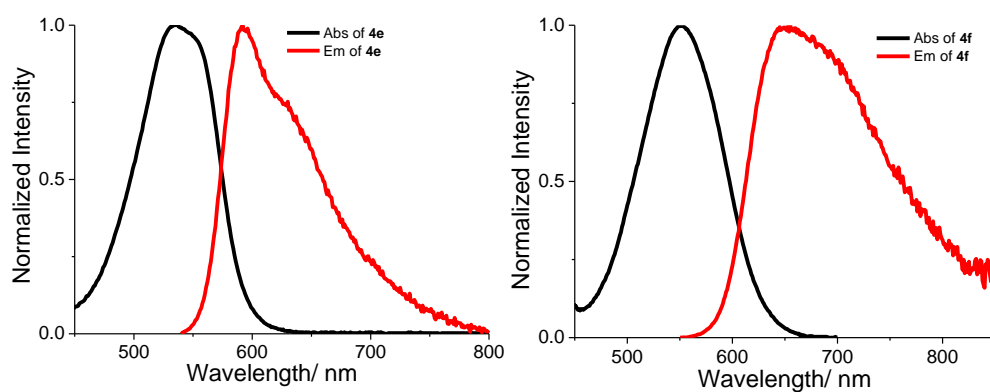

Figure S12. Absorption and fluorescence emission (right) spectra of **4e** (left) and **4f** (right) recorded in dichloromethane (excitation at 520 nm).

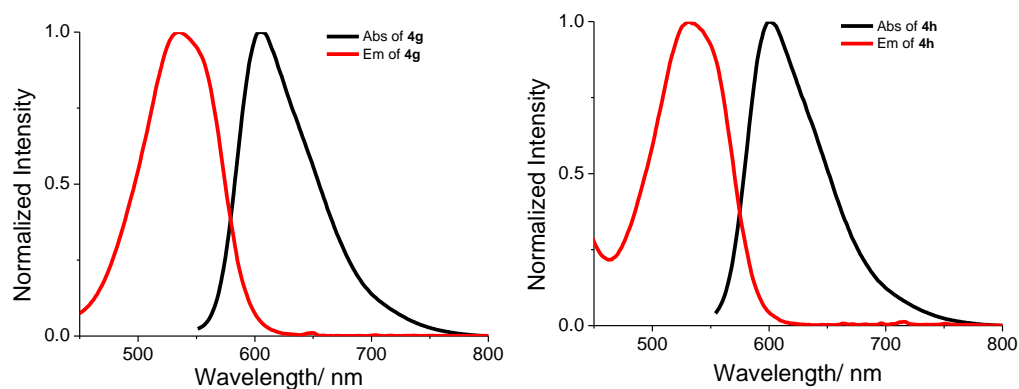

Figure S13. Absorption and fluorescence emission (right) spectra of **4g** (left) and **4h** (right) recorded in dichloromethane (excitation at 520 nm).

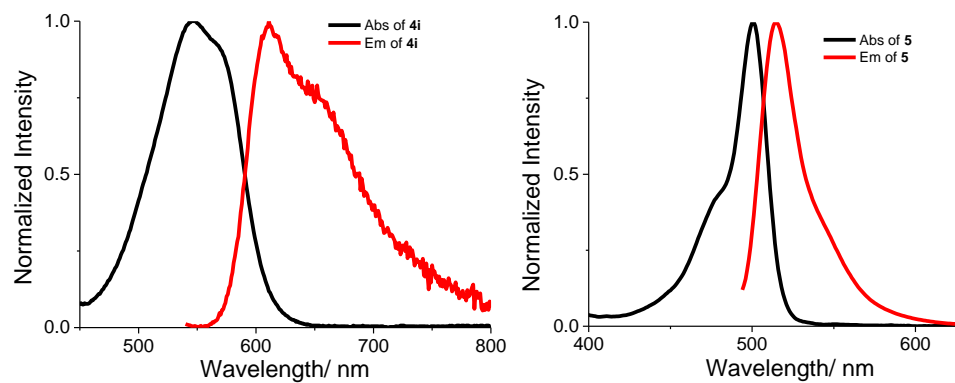

Figure S14. Absorption and fluorescence emission (right) spectra of **4i** (left, excitation at 520 nm) and **5** (right, excitation at 480 nm) recorded in dichloromethane.

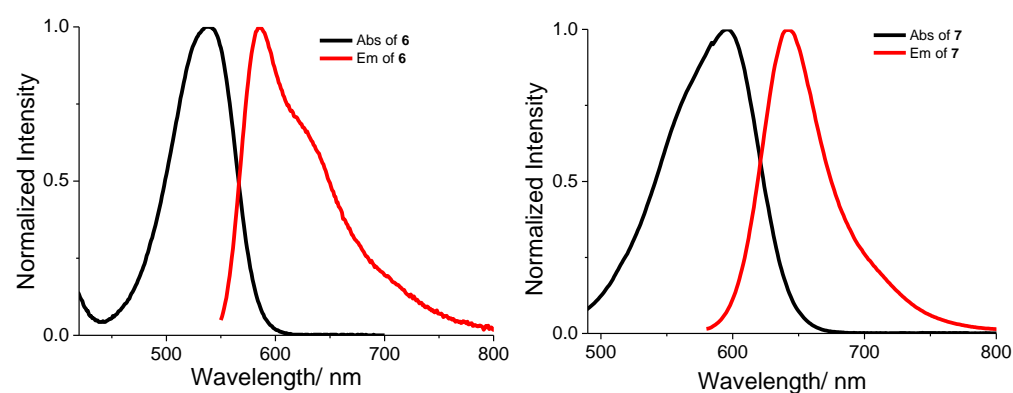

Figure S15. Absorption and fluorescence emission spectra of **6** (left, (excitation at 520 nm) and **7** (right, (excitation at 550 nm) recorded in dichloromethane.

## 8. Cellular studies

### 8.1 Cell culture

HeLa cells (human cervical cancer cells) were cultured in culture media (RPMI-1640, supplemented with 10% FBS and 1% penicillin/streptomycin solution) at 37 °C in an atmosphere of 5% CO<sub>2</sub> and 95% humidified atmosphere for 24 h.

### 8.2 Cytotoxicity determined by the CCK-8 method

The cytotoxicity of the **3d-p** was evaluated on HeLa cells. These cells were seeded into 96-well plates with a density of 5000 cells per well and cultured overnight. Then, **3d-p** solutions with serious concentrations were added and incubated with cells for 24 h. Every experiment was performed for at least three times. The working solutions were then removed, and the cells were washed with PBS buffer for two times. A total of 10 µL of CCK-8 (Cell Counting Kit-8, BIOMIKY) was added into each well, and the cells were further incubated at 37 °C for 2 h. Then the plate was shaken for 5 min (protect from light), and the absorbance at 450 nm was measured with a microplate reader (Multiskan Sky).

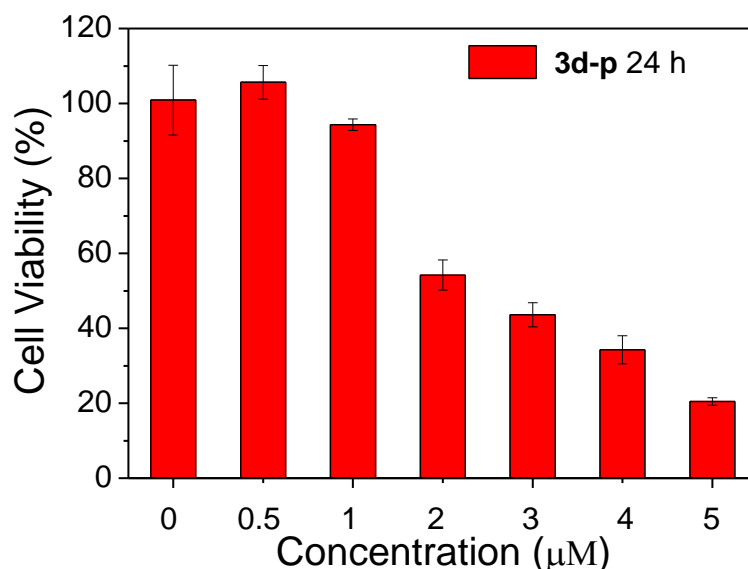

**Figure S16.** Viability of HeLa cells treated with 0.0, 0.5, 1.0, 2.0, 3.0, 4.0 and 5.0 µM of **3d-p** for 24 h as demonstrated by CCK-8 assay.

## 8.2 Cellular uptake

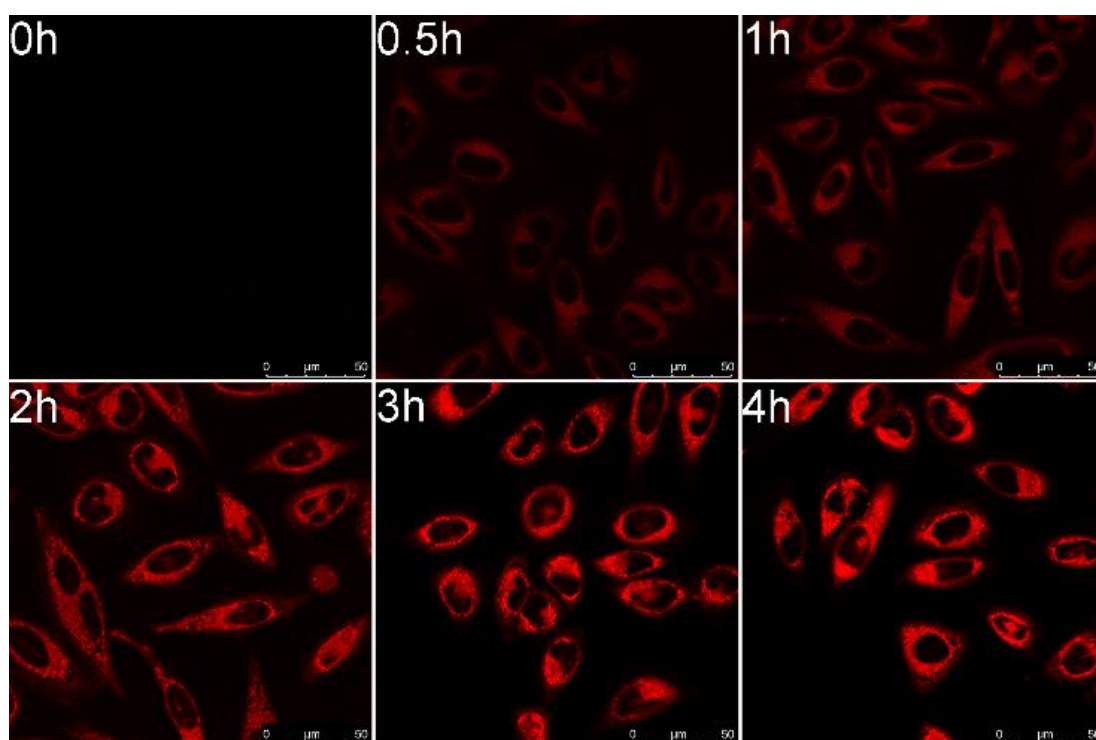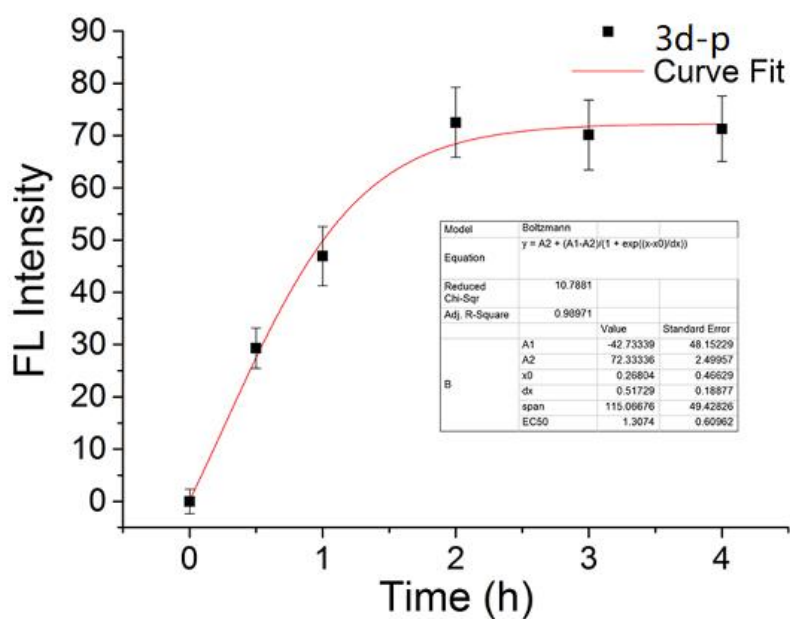

**Figure S17.** (a) Fluorescence microscopy images of time-dependent uptake of **3d-p** at 1.0  $\mu\text{M}$  by HeLa cells (human cervical cells). (b) Fluorescence intensity quantitation was analyzed by the images.

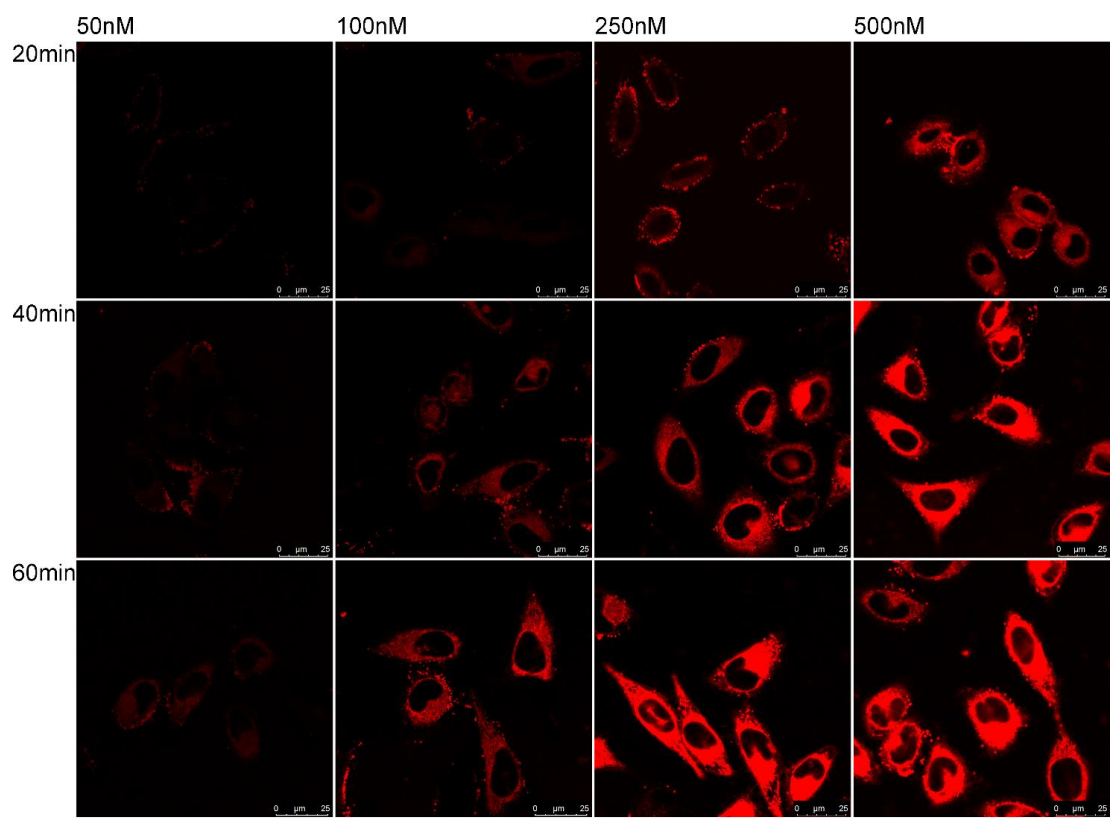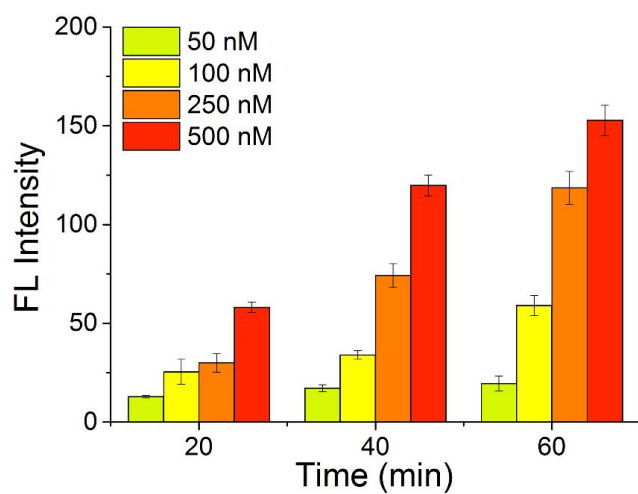

**Figure S18.** (a) Fluorescence microscopy images of HeLa cells with **3d-p** (50, 100, 250, 500 nM) for 20, 40 and 60 min at 37 °C. (b) Fluorescence intensity quantitation was analyzed by these images.

### 8.3 Two-photon fluorescence imaging

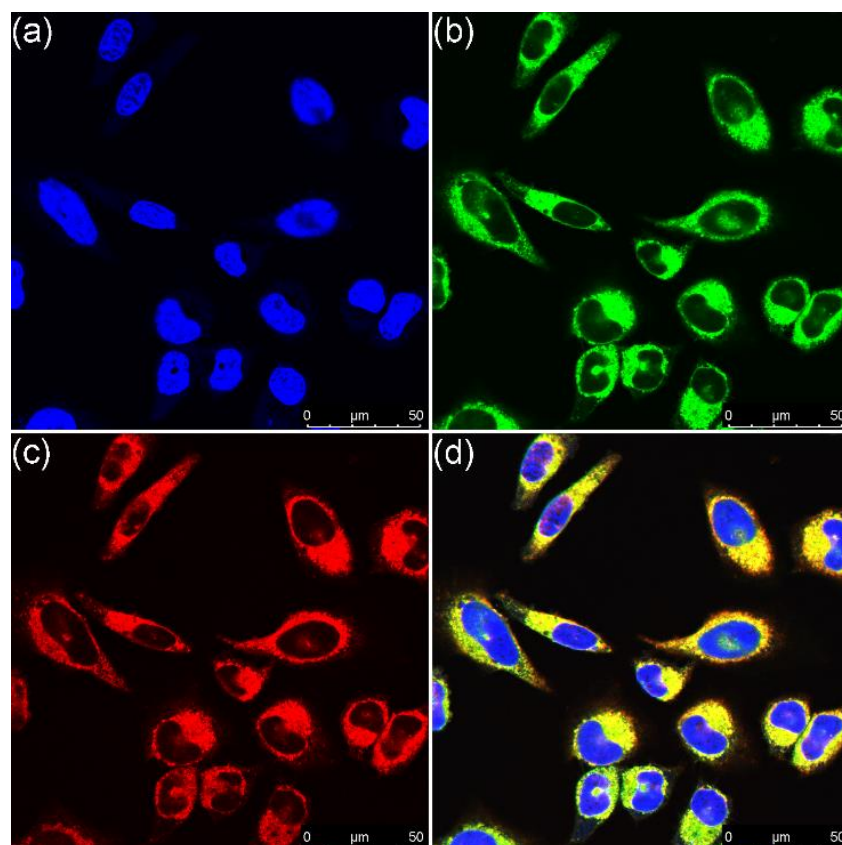

**Figure S19.** Fluorescence images using **3d-p** in HeLa cells. The cells were incubated with **3d-p** (1.0 μM) for 1 h at 37 °C. Images for **3d-p** were then recorded using excitation wavelengths of 550 nm (single photon) and 900 nm (two-photon), and recording over the 590-720 nm spectral regions, respectively. (a) DAPI fluorescence, (b) single photon fluorescence of **3d-p**, (c) two-photon fluorescence of **3d-p** and (d) merged images of parts a, b and c. Scale bars = 50 μm.

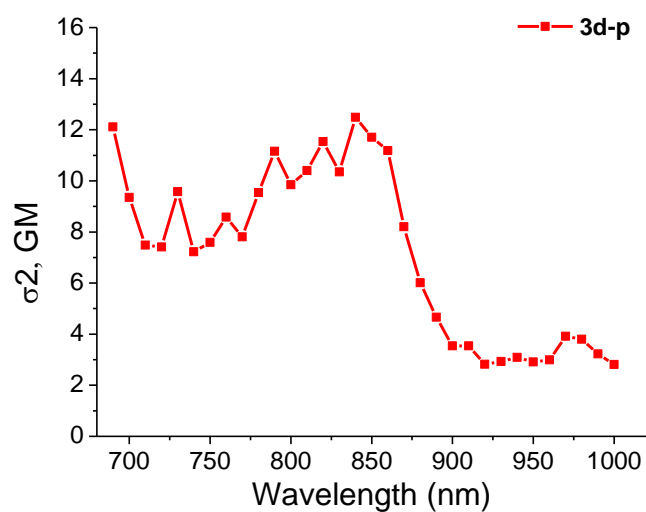

**Figure S20.** Two photon excitation spectra of **3d-p** in ethanol.



## 9. Electrochemical data

**Table S6. Electrochemical data acquired at 100 mV/s, and HOMO-LUMO Gaps determined from spectroscopy of dyes 1a, 5, 6, 4a and 3a<sup>a</sup>**

| dyes      | $E_{1/2}^{\text{red}}$ | $E_{pa}^{\text{red}}$ | $E_{\text{red}}^{\text{onest}}$ | $E_{pa}^{\text{ox}}$ | $E_{\text{ox}}^{\text{onest}}$ | LUMO  | HOMO  | $E_g^e$ | $E_g^o$ |
|-----------|------------------------|-----------------------|---------------------------------|----------------------|--------------------------------|-------|-------|---------|---------|
|           | (V)                    | (V)                   | (V)                             | (V)                  | (V)                            | (eV)  | (eV)  | (eV)    | (eV)    |
| <b>1a</b> | -0.96                  | -                     | -0.87                           | 1.79                 | 1.48                           | -3.53 | -5.88 | 2.35    | 2.38    |
| <b>5</b>  | -0.77                  | -                     | -0.69                           | -                    | 1.65                           | -3.71 | -6.05 | 2.34    | 2.28    |
| <b>6</b>  | -0.82                  | -                     | -0.61                           | 1.46                 | 1.33                           | -3.79 | -5.73 | 1.94    | 2.02    |
| <b>4a</b> | -0.68                  | -1.85                 | -0.60                           | 1.63                 | 1.51                           | -3.80 | -5.91 | 2.11    | 2.04    |
| <b>3a</b> | -0.76                  | -                     | -0.62                           | 1.42                 | 1.28                           | -3.78 | -5.68 | 1.90    | 1.96    |

<sup>a</sup> $E_{1/2}^{\text{red}}$  = half wave potentials of reversible reduction potential;  $E_{pa}^{\text{red}}$  = irreversible reduction peak potentials;  $E_{\text{red}}^{\text{onest}}$  = the onset reduction potentials;  $E_{pa}^{\text{ox}}$  = irreversible oxidation peak potentials;  $E_{\text{ox}}^{\text{onest}}$  = the onset oxidation potentials;  $E_{\text{LUMO}} = -e(E_{\text{red}}^{\text{onest}} + 4.4)$ ;  $E_{\text{HOMO}} = -e(E_{\text{ox}}^{\text{onest}} + 4.4)$ ;  $E_g^e$  = bandgap, obtained from the intercept of the electrochemical data;  $E_g^o = E_{\text{LUMO}} - E_{\text{HOMO}}$ ;  $E_g^o$  = bandgap, obtained from the intercept of the absorption spectra.

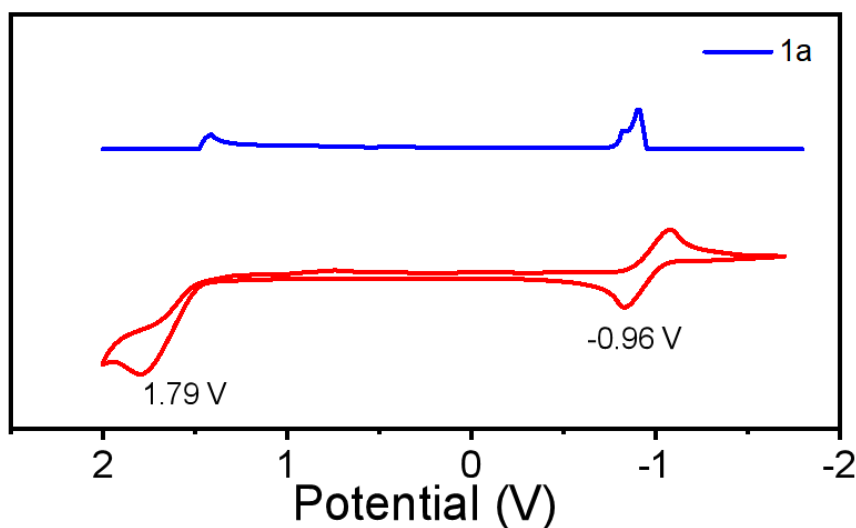

**Figure S21.** Differential pulse voltammogram and cyclic voltammogram of **1a** recorded in dichloromethane containing 0.1 M TBAPF<sub>6</sub> at room temperature.

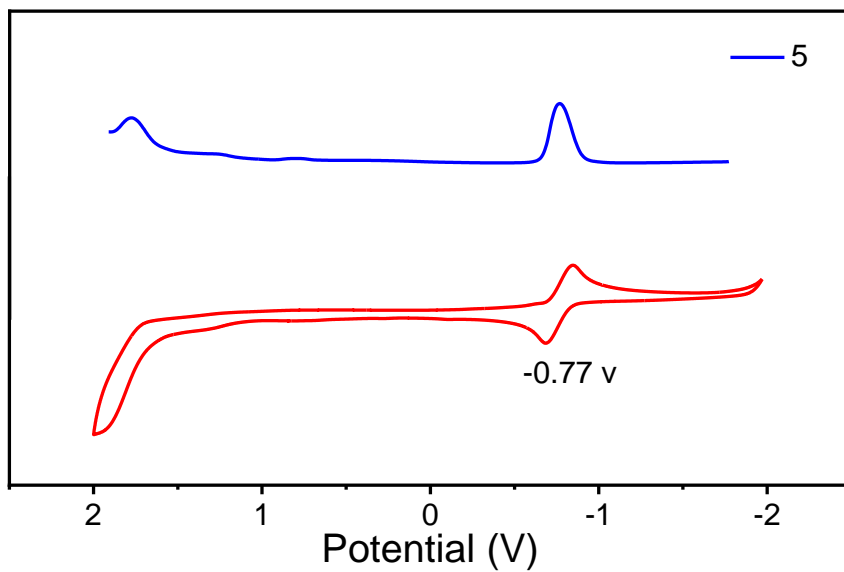

Figure S22. Differential pulse voltammogram and cyclic voltammogram of **5** recorded in dichloromethane containing 0.1 M TBAPF<sub>6</sub> at room temperature.

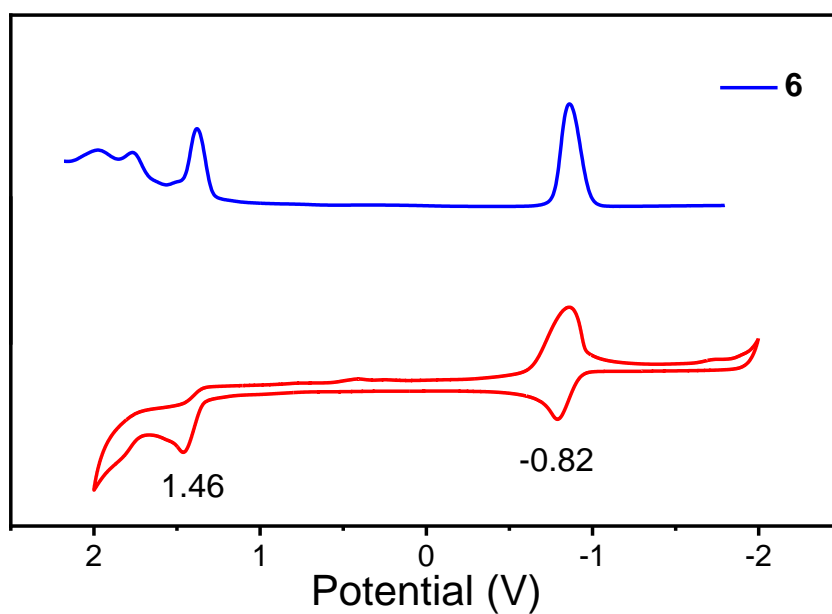

Figure S23. Differential pulse voltammogram and cyclic voltammogram of **6** recorded in dichloromethane containing 0.1 M TBAPF<sub>6</sub> at room temperature.

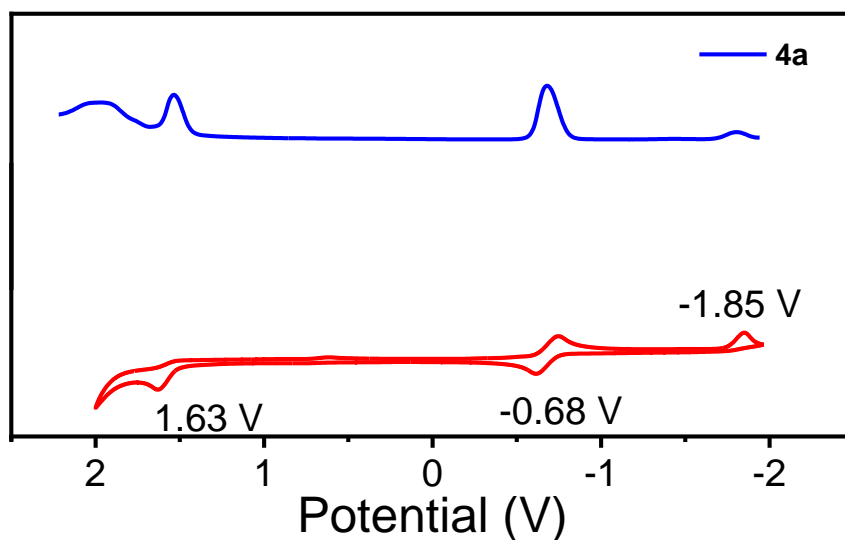

Figure S24. Differential pulse voltammogram and cyclic voltammogram of **4a** recorded in dichloromethane containing 0.1 M TBAPF<sub>6</sub> at room temperature.

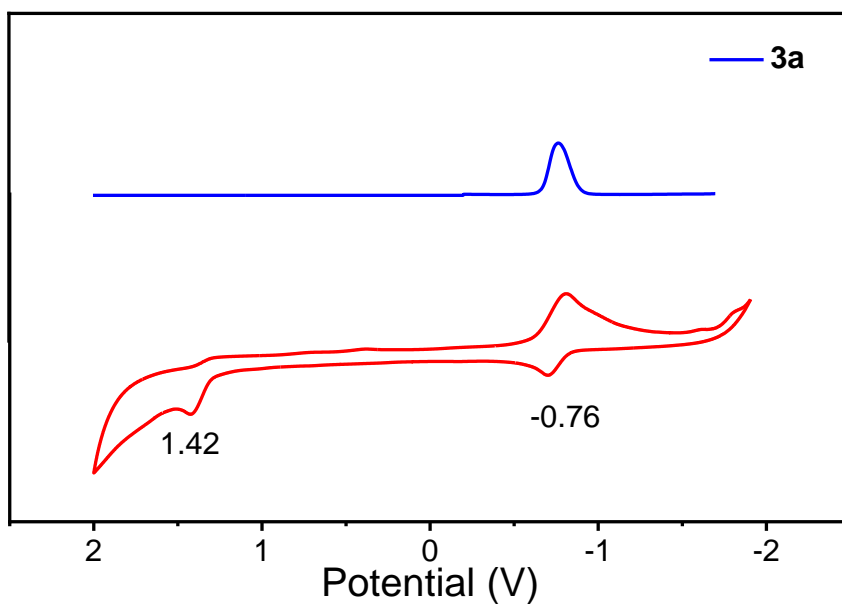

Figure S25. Differential pulse voltammogram and cyclic voltammogram of **3a** recorded in dichloromethane containing 0.1 M TBAPF<sub>6</sub> at room temperature.

## 10. NMR and HRMS spectra of all new compounds

$^1\text{H}$  NMR spectrum of **3a** in  $\text{CDCl}_3$

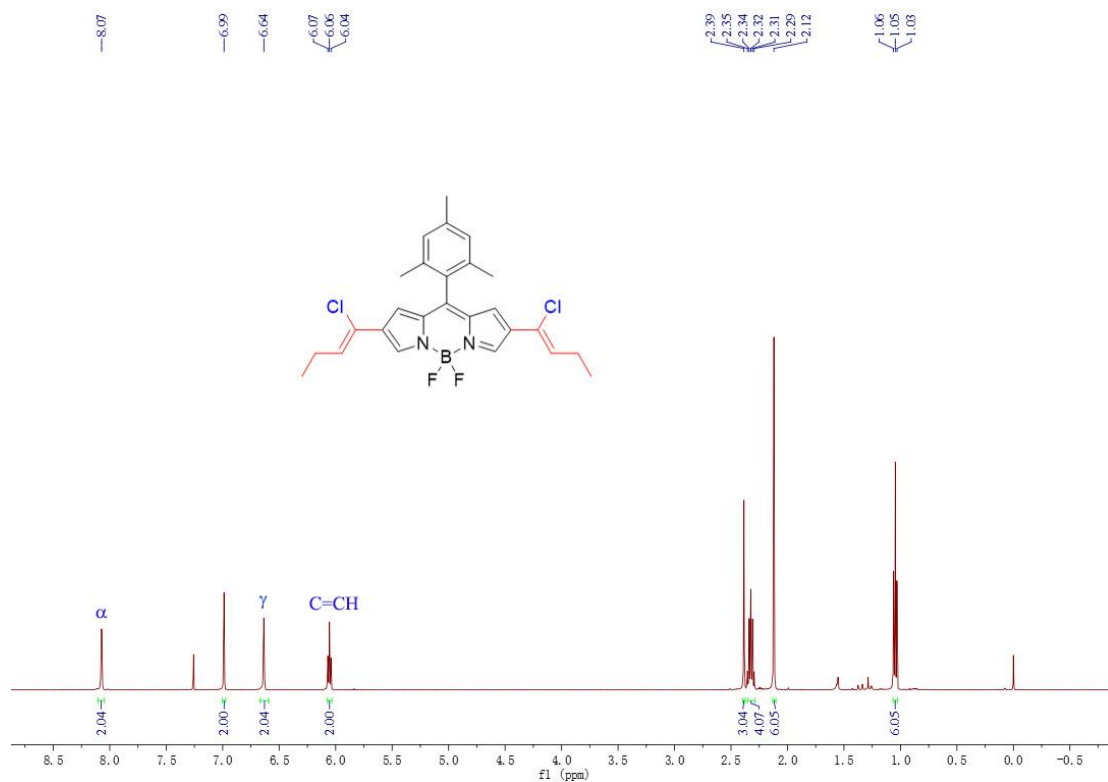

$^{13}\text{C}$  NMR spectrum of **3a** in  $\text{CDCl}_3$

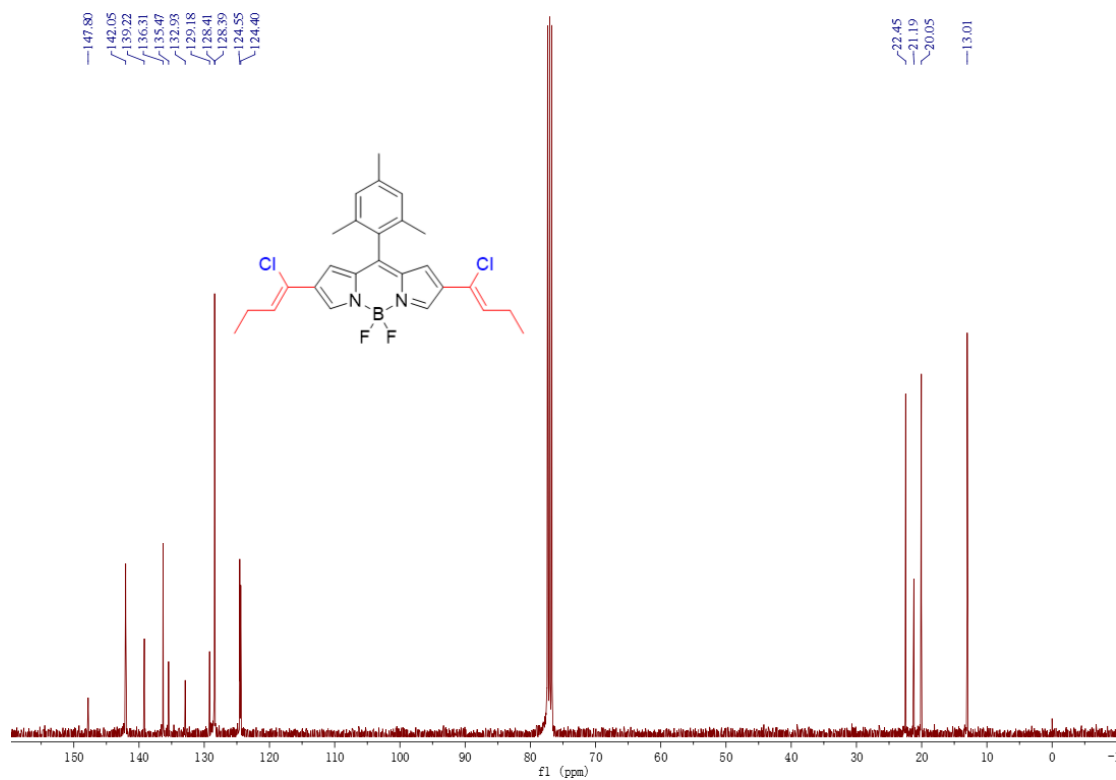

$^{11}\text{B}$  NMR spectrum of **3a** in  $\text{CDCl}_3$

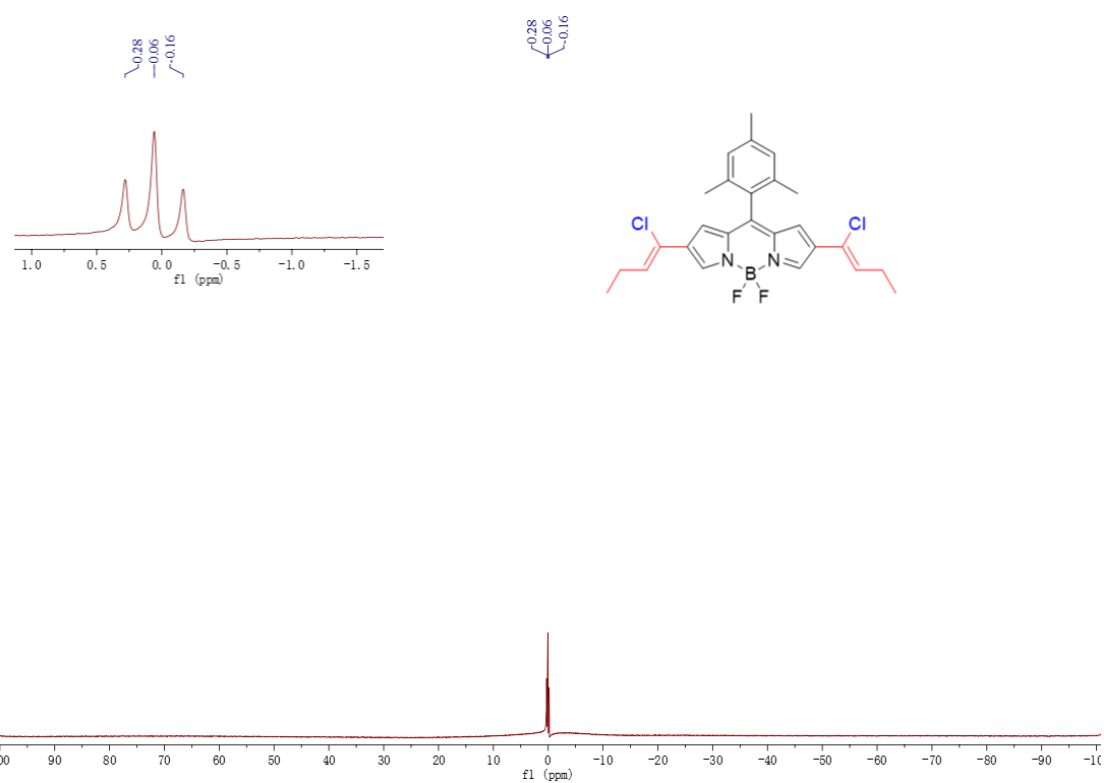

$^{19}\text{F}$  NMR spectrum of **3a** in  $\text{CDCl}_3$

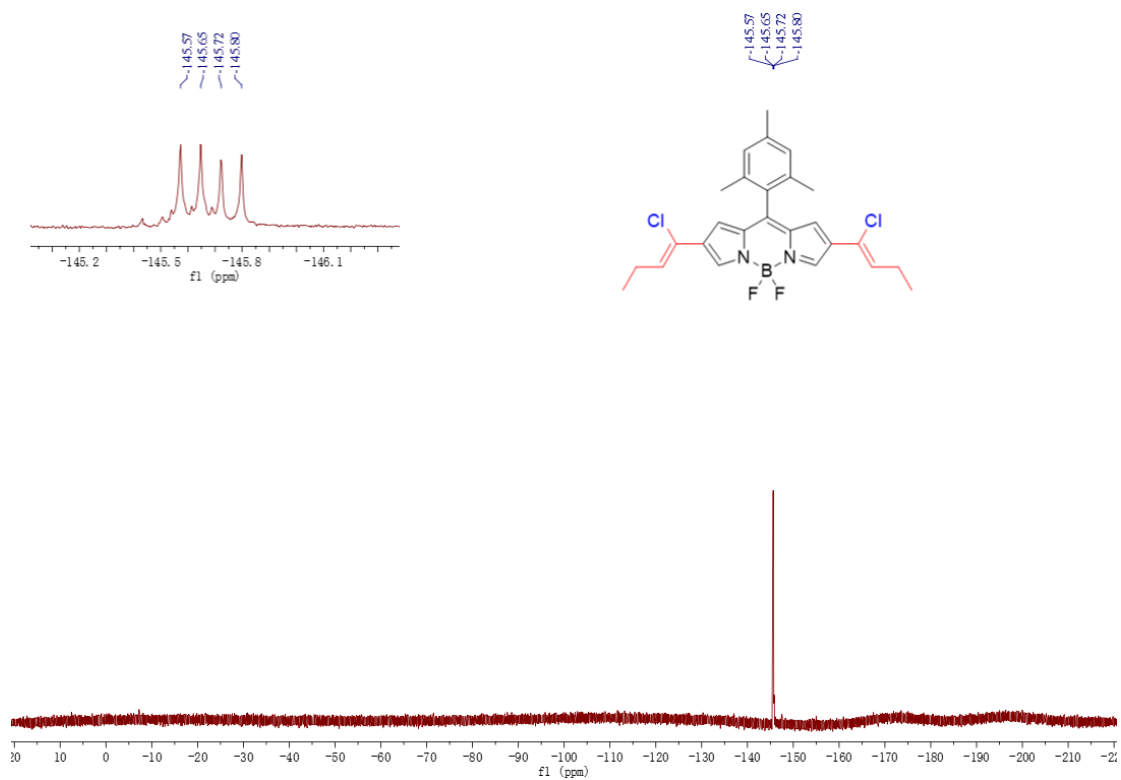

$^1\text{H}$  NMR spectrum of **3b** in  $\text{CDCl}_3$

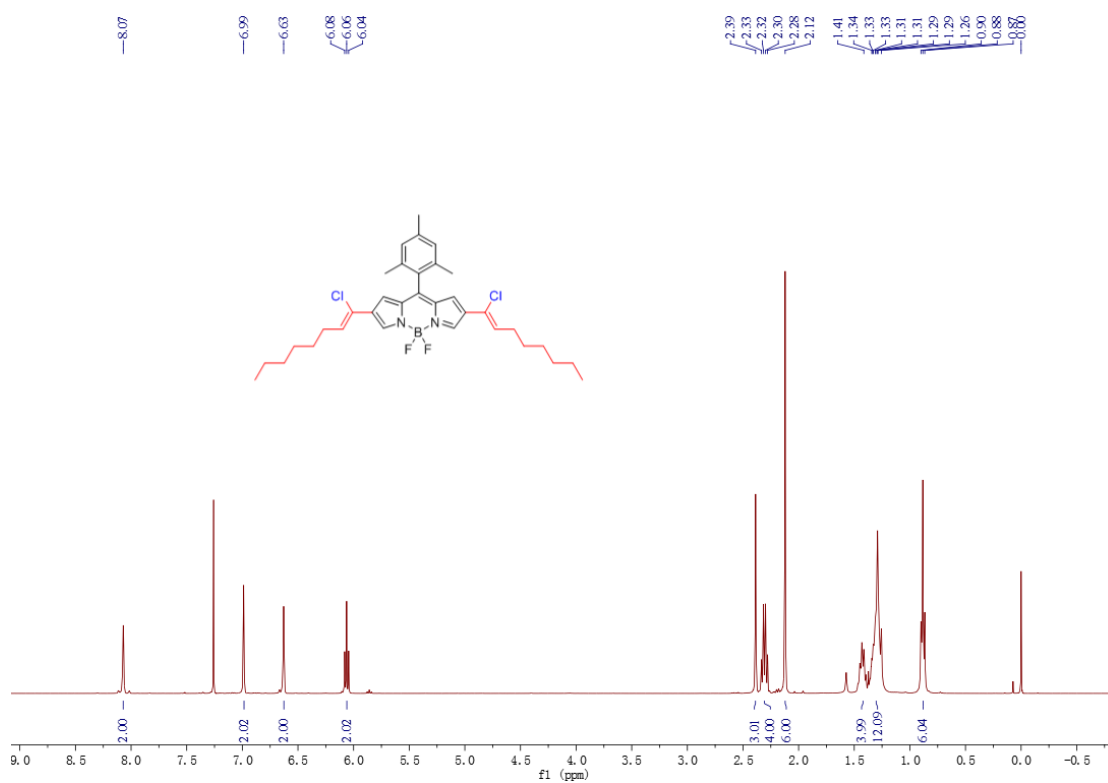

$^{13}\text{C}$  NMR spectrum of **3b** in  $\text{CDCl}_3$

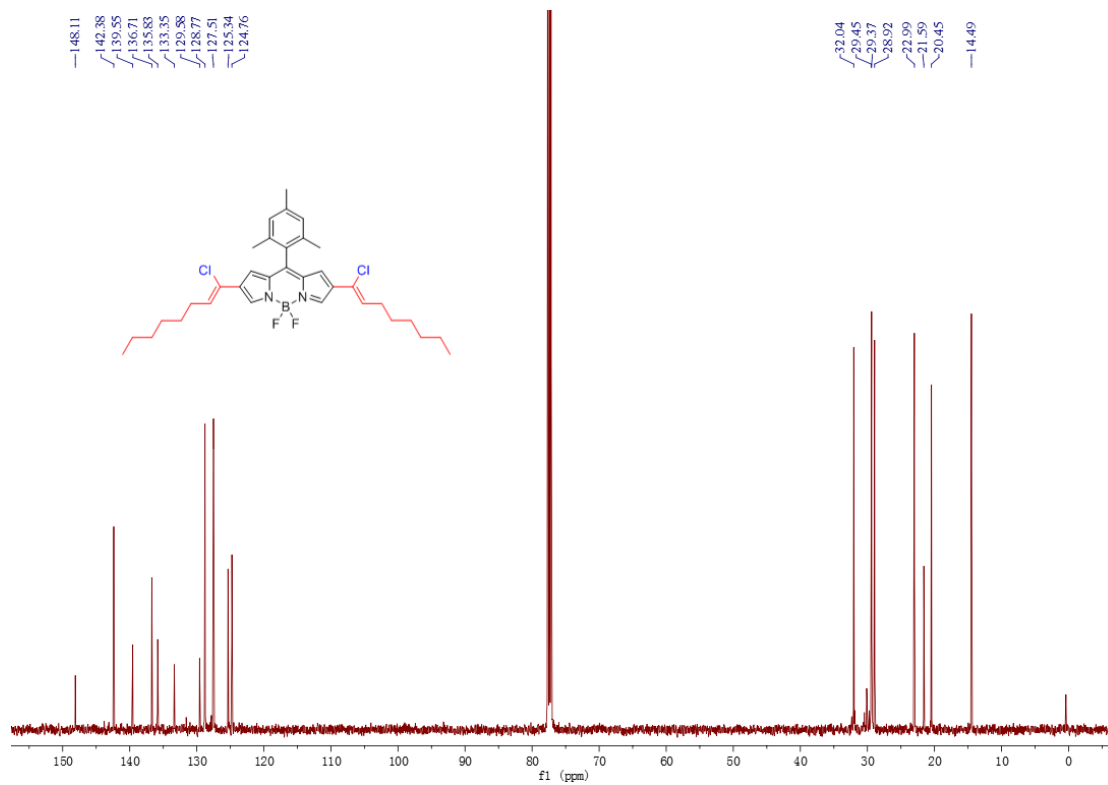

$^{11}\text{B}$  NMR spectrum of **3b** in  $\text{CDCl}_3$

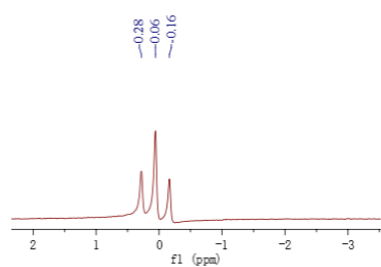

0.28  
0.06  
-0.16

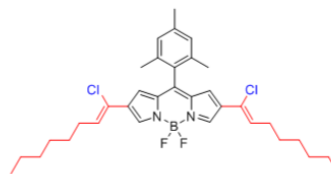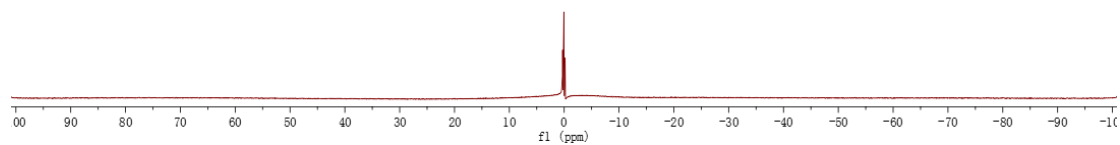

$^{19}\text{F}$  NMR spectrum of **3b** in  $\text{CDCl}_3$

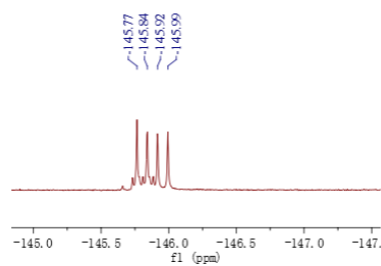

-145.77  
-145.84  
-145.92  
-145.99

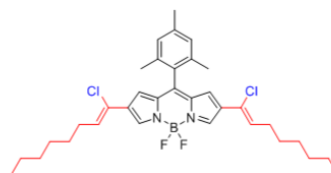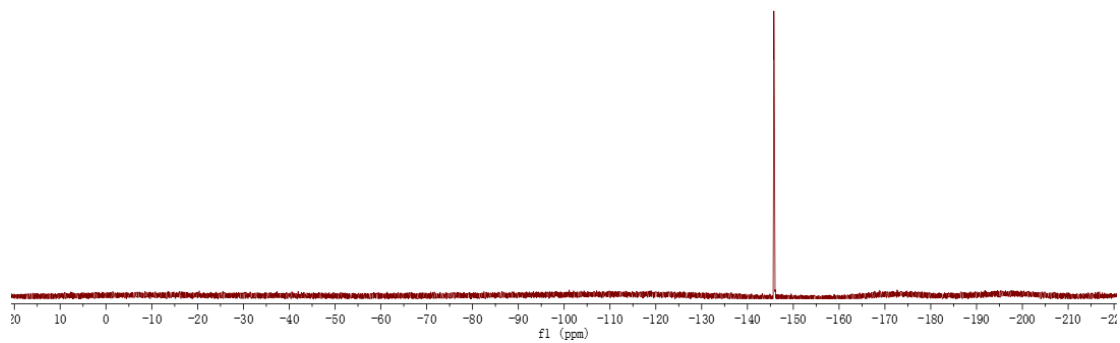

$^1\text{H}$  NMR spectrum of **3c** in  $\text{CDCl}_3$

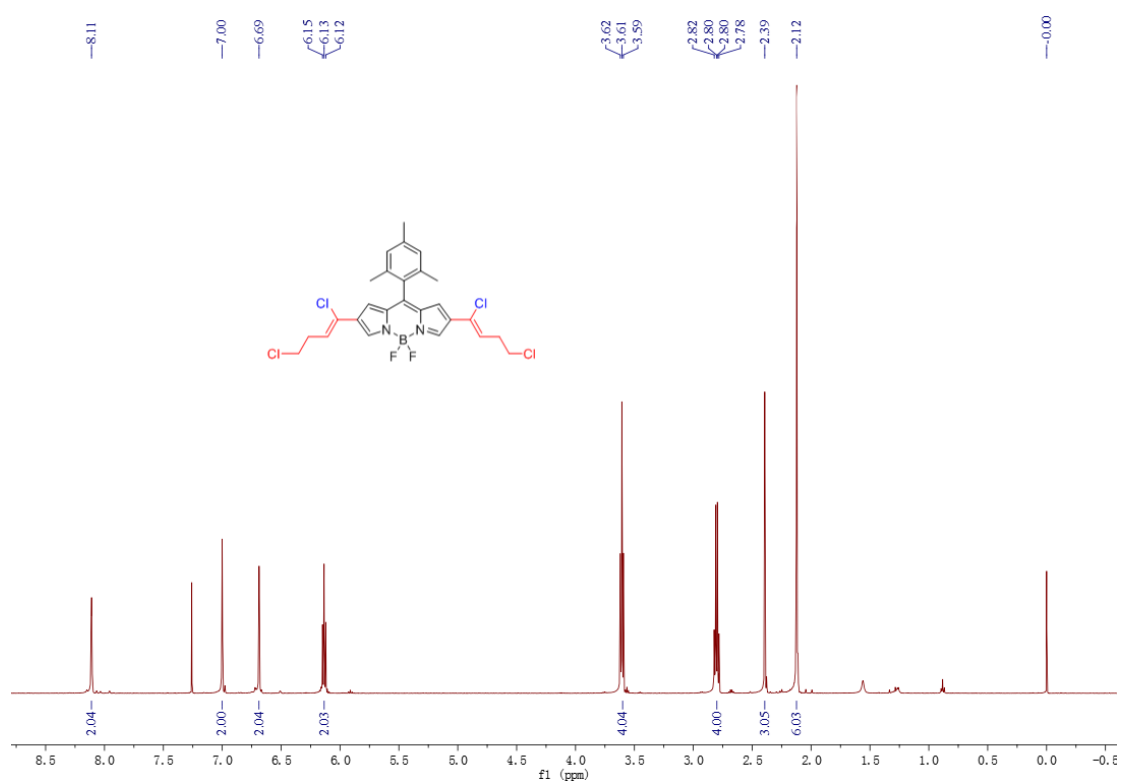

$^{13}\text{C}$  NMR spectrum of **3c** in  $\text{CDCl}_3$

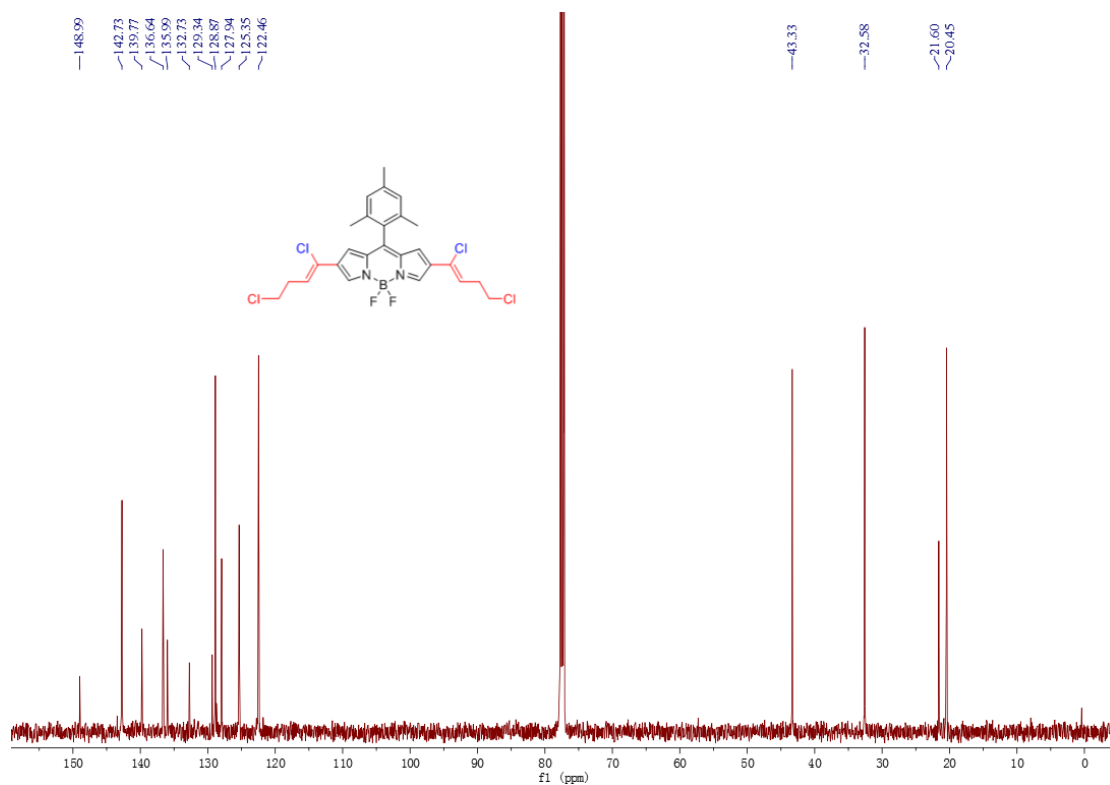



$^{11}\text{B}$  NMR spectrum of **3c** in  $\text{CDCl}_3$

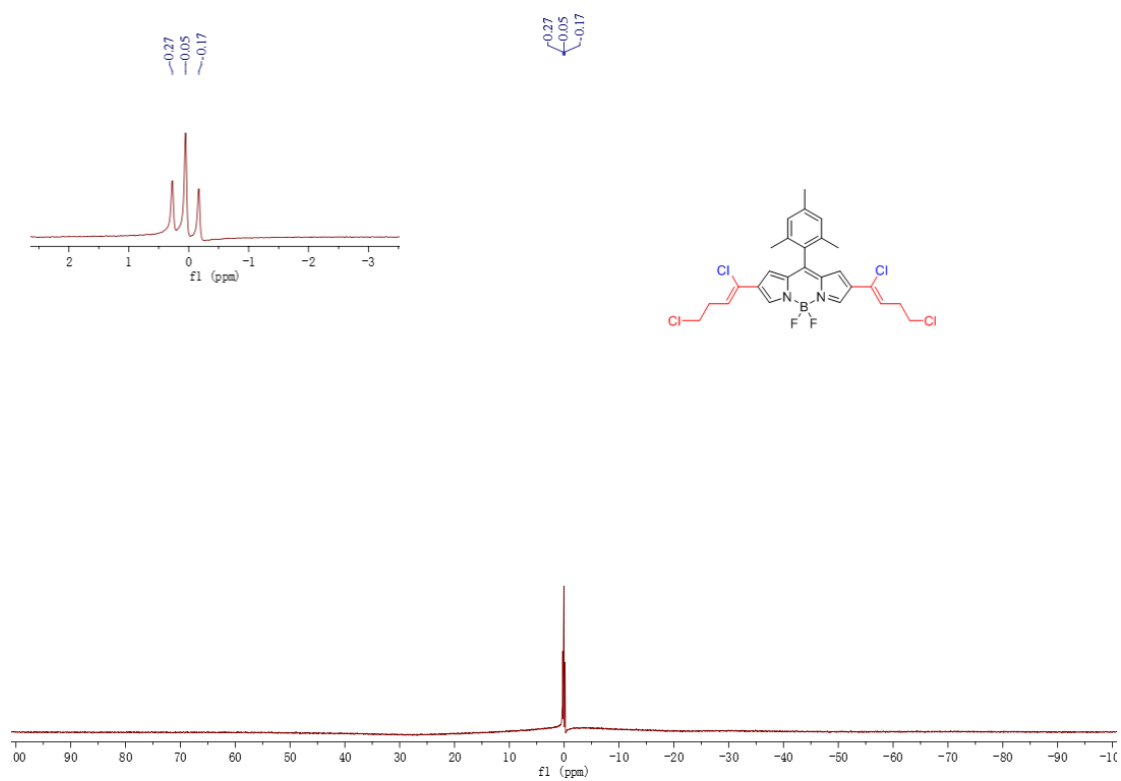

$^{19}\text{F}$  NMR spectrum of **3c** in  $\text{CDCl}_3$

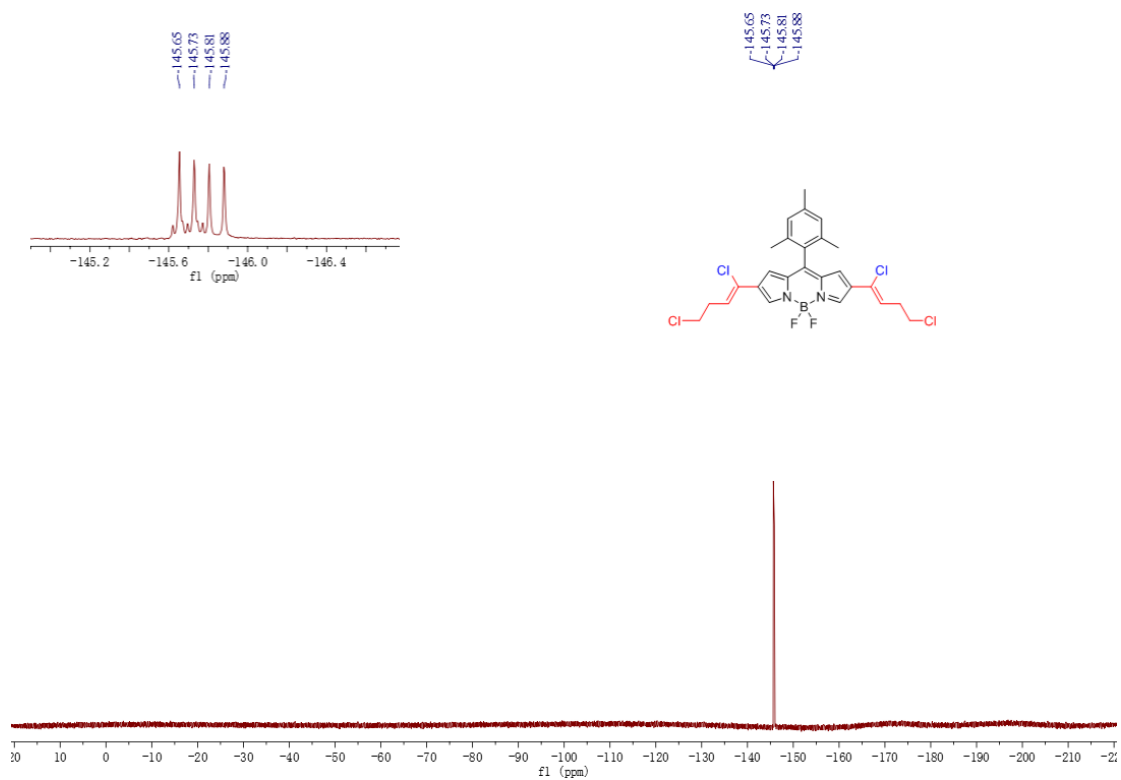

$^1\text{H}$  NMR spectrum of **3d** in  $\text{CDCl}_3$

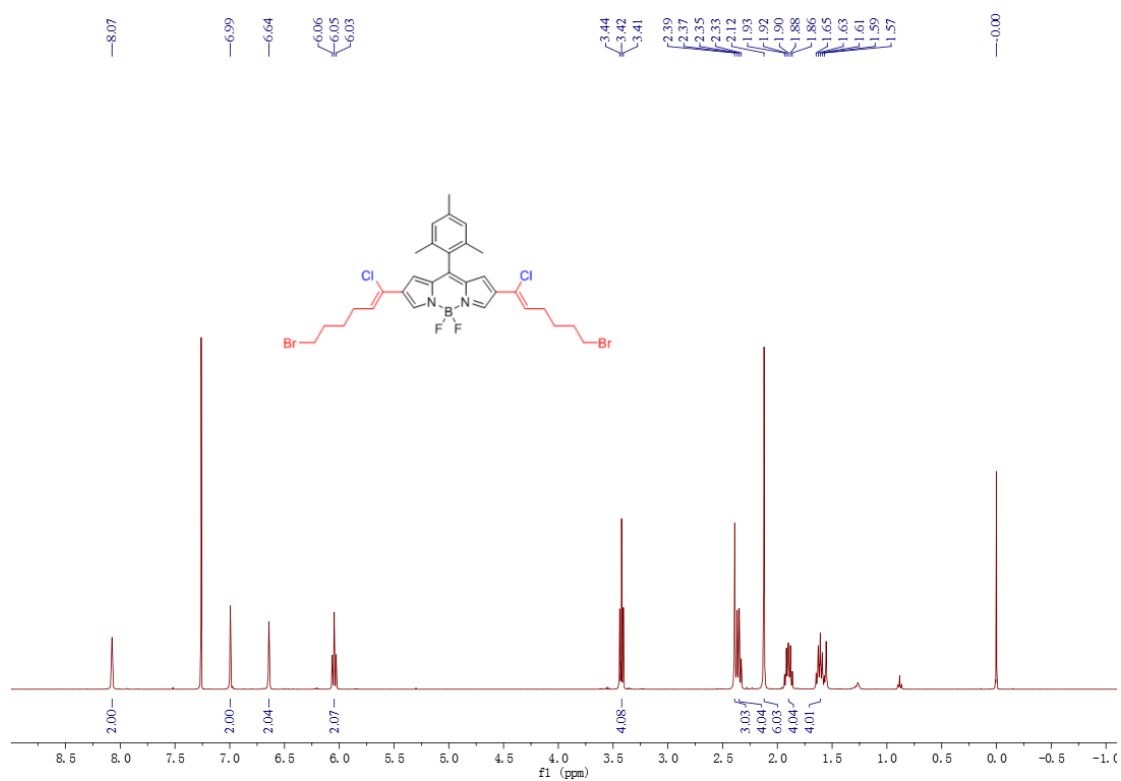

$^{13}\text{C}$  NMR spectrum of **3d** in  $\text{CDCl}_3$

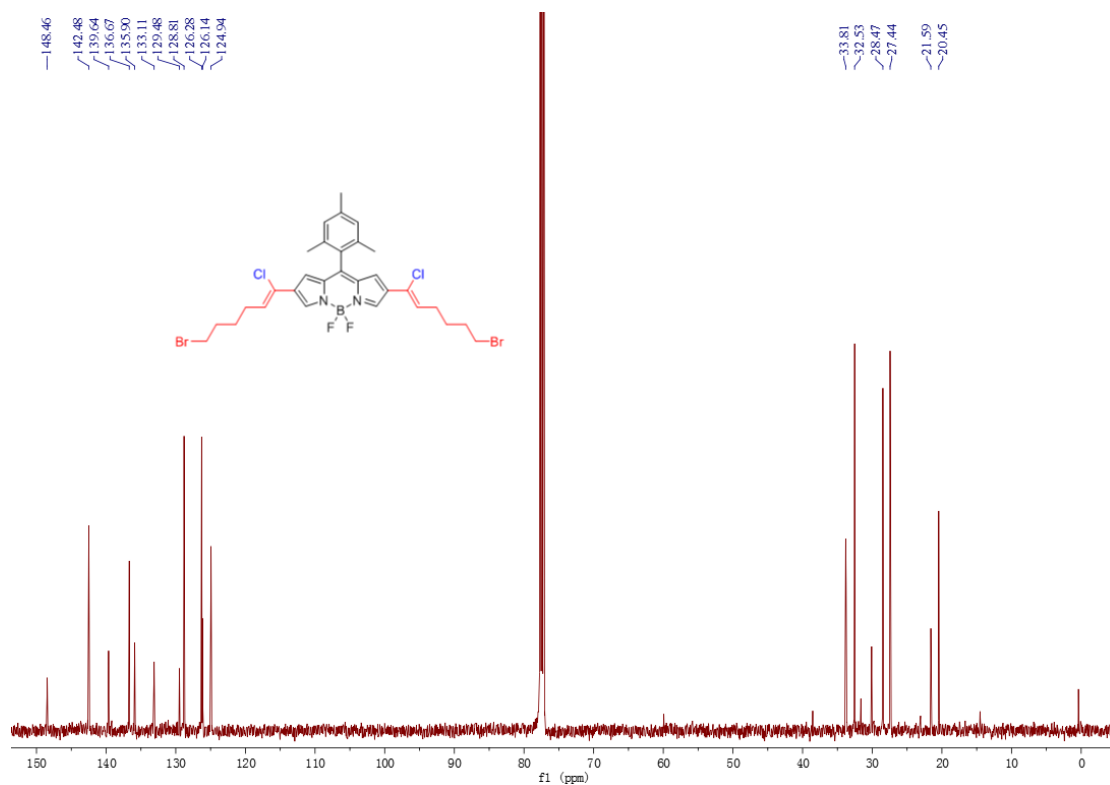

$^{11}\text{B}$  NMR spectrum of **3d** in  $\text{CDCl}_3$

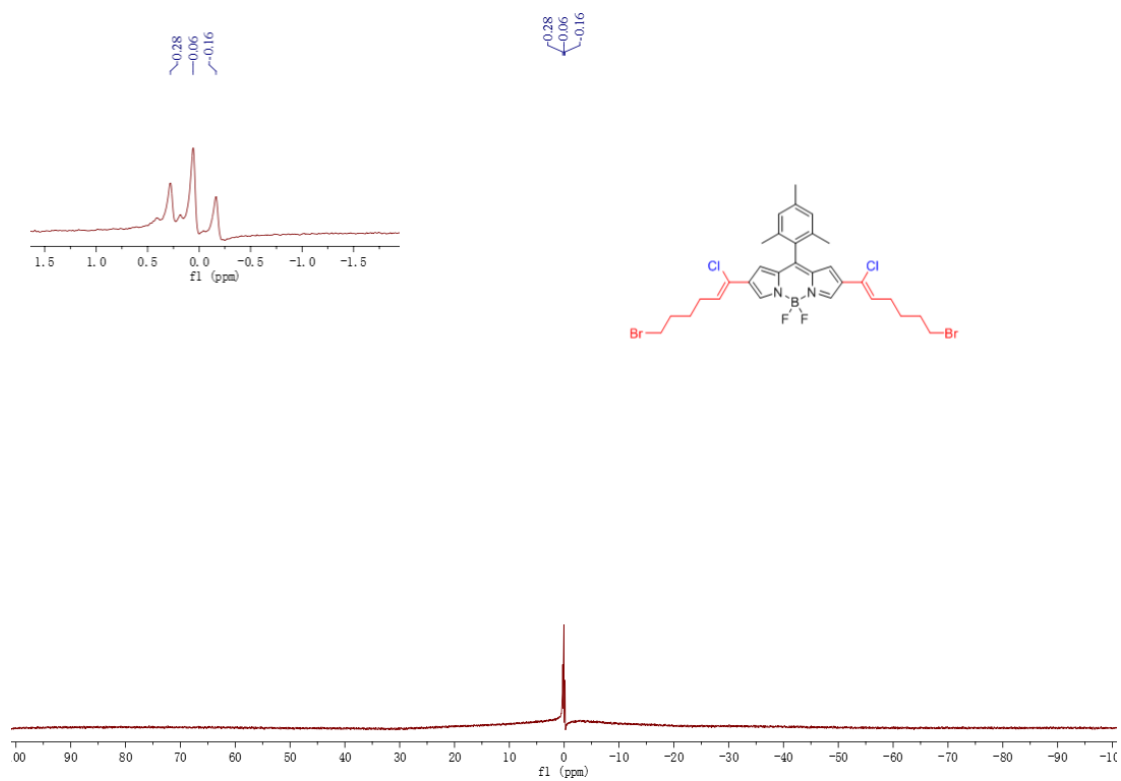

$^{19}\text{F}$  NMR spectrum of **3d** in  $\text{CDCl}_3$

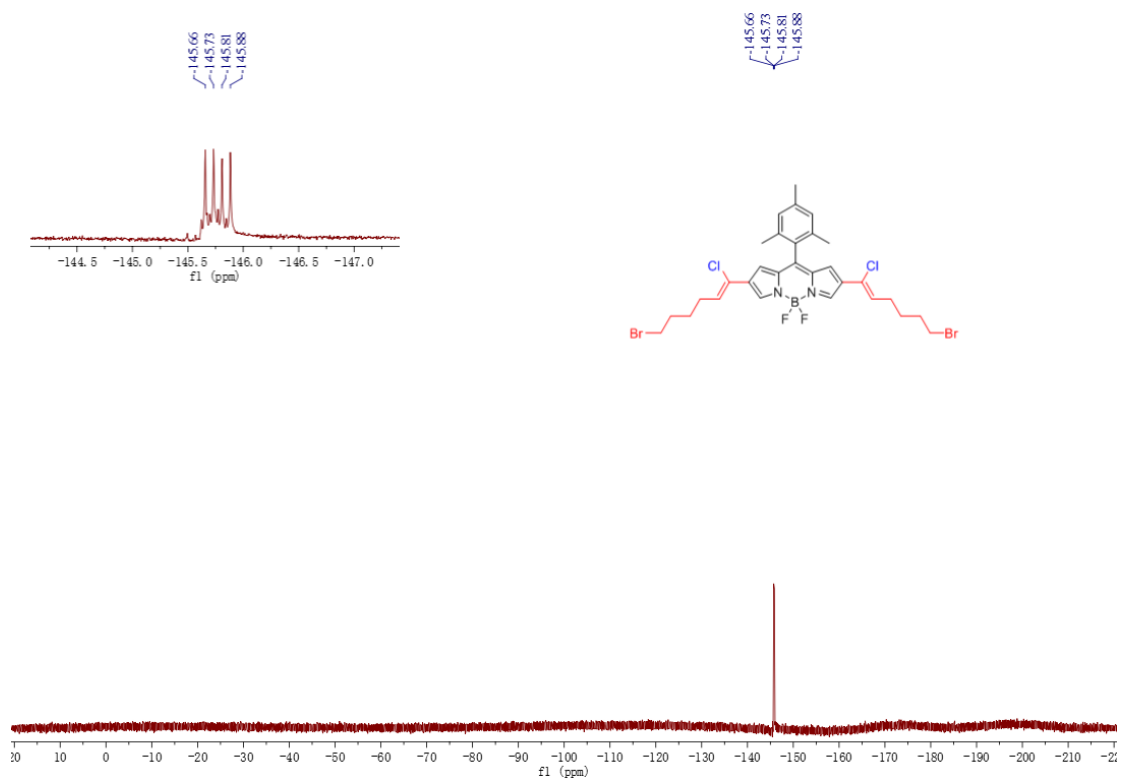

$^1\text{H}$  NMR spectrum of **3e** in  $\text{CDCl}_3$

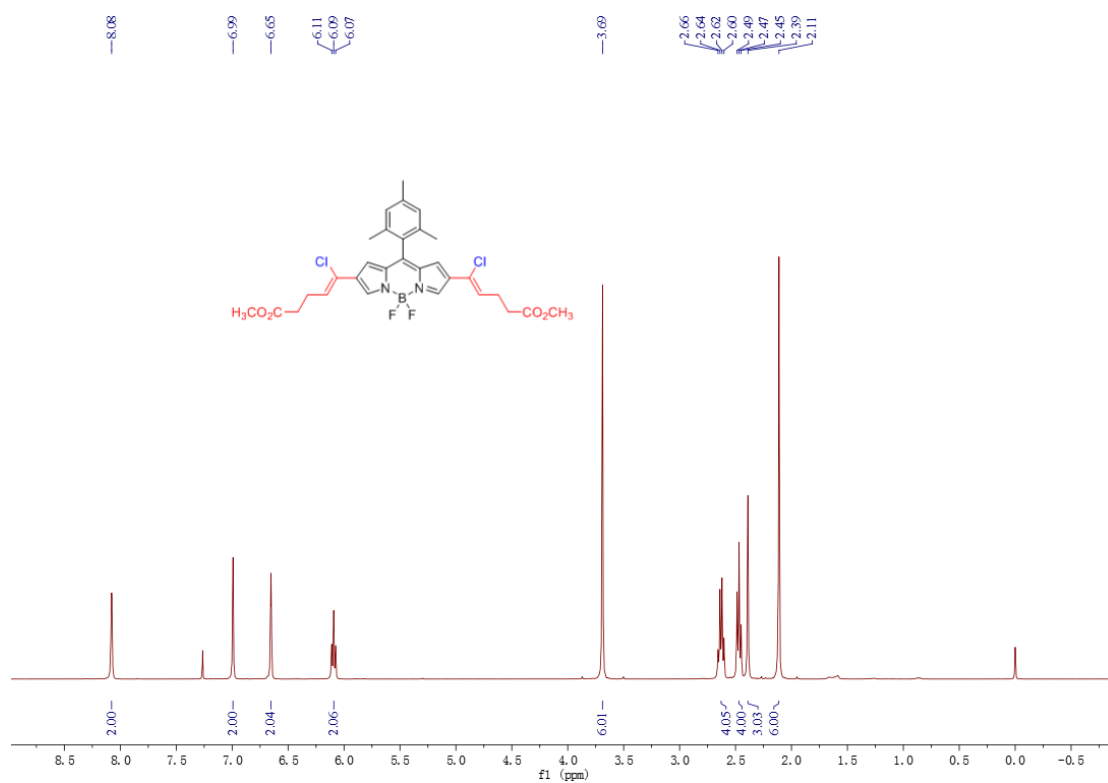

$^{13}\text{C}$  NMR spectrum of **3e** in  $\text{CDCl}_3$

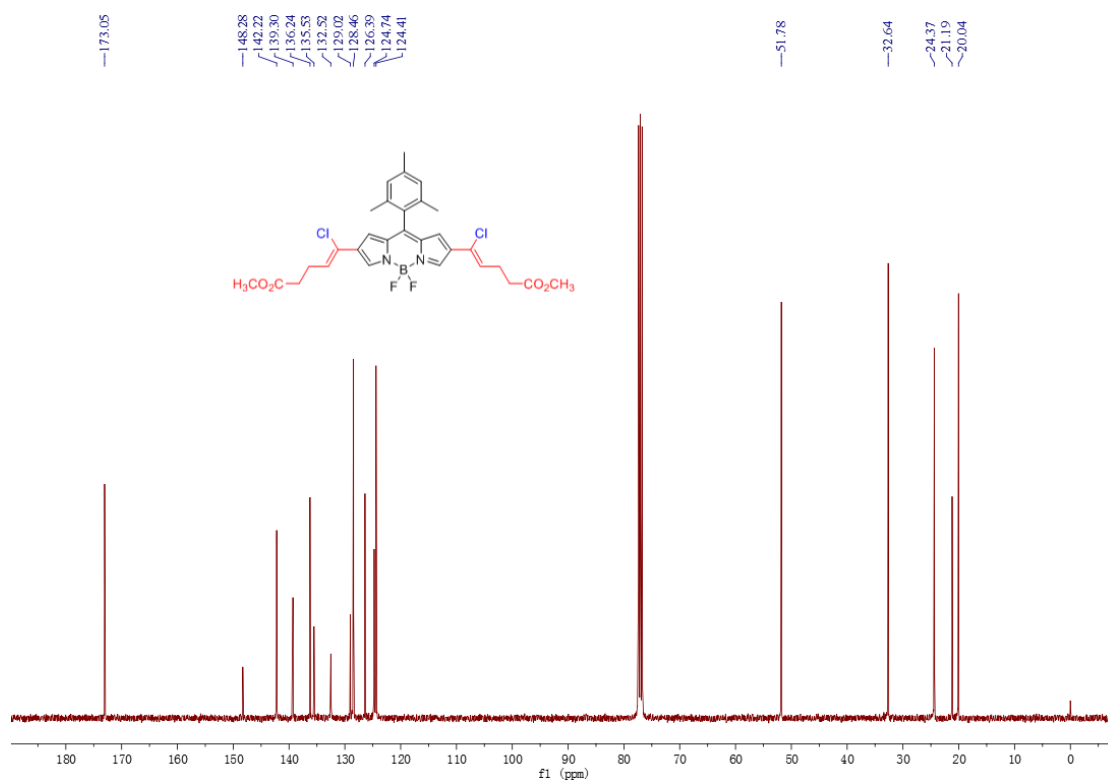

$^{11}\text{B}$  NMR spectrum of **3e** in  $\text{CDCl}_3$

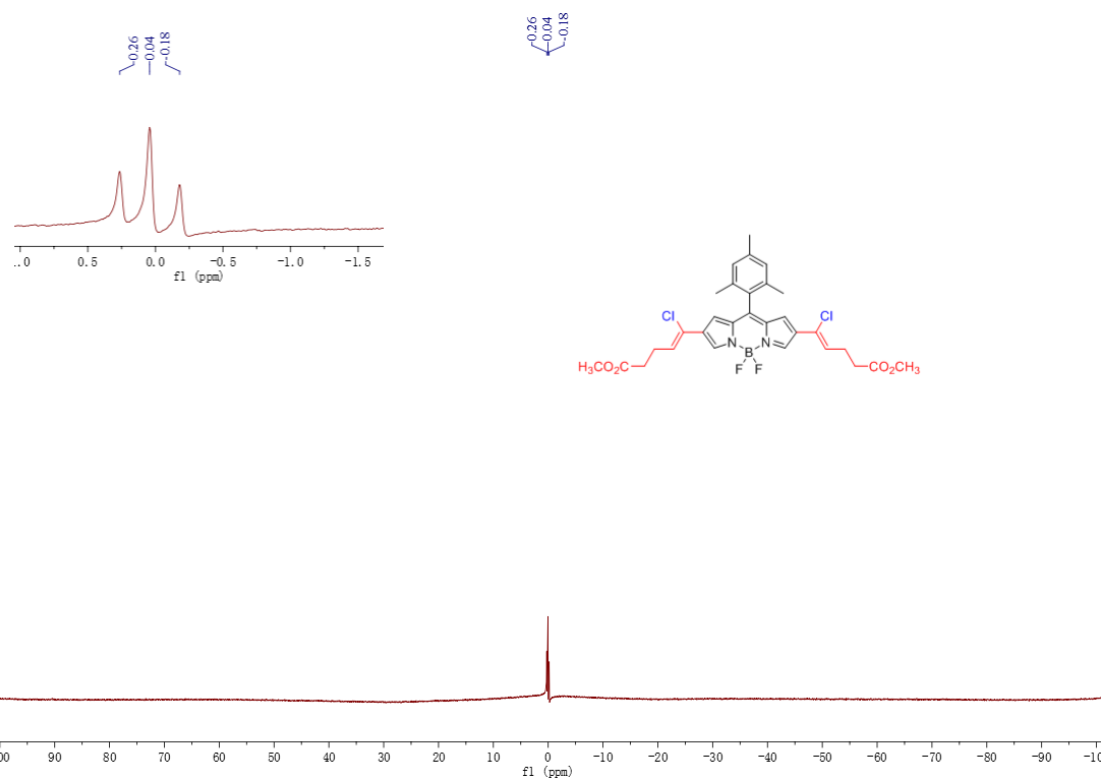

$^{19}\text{F}$  NMR spectrum of **3e** in  $\text{CDCl}_3$

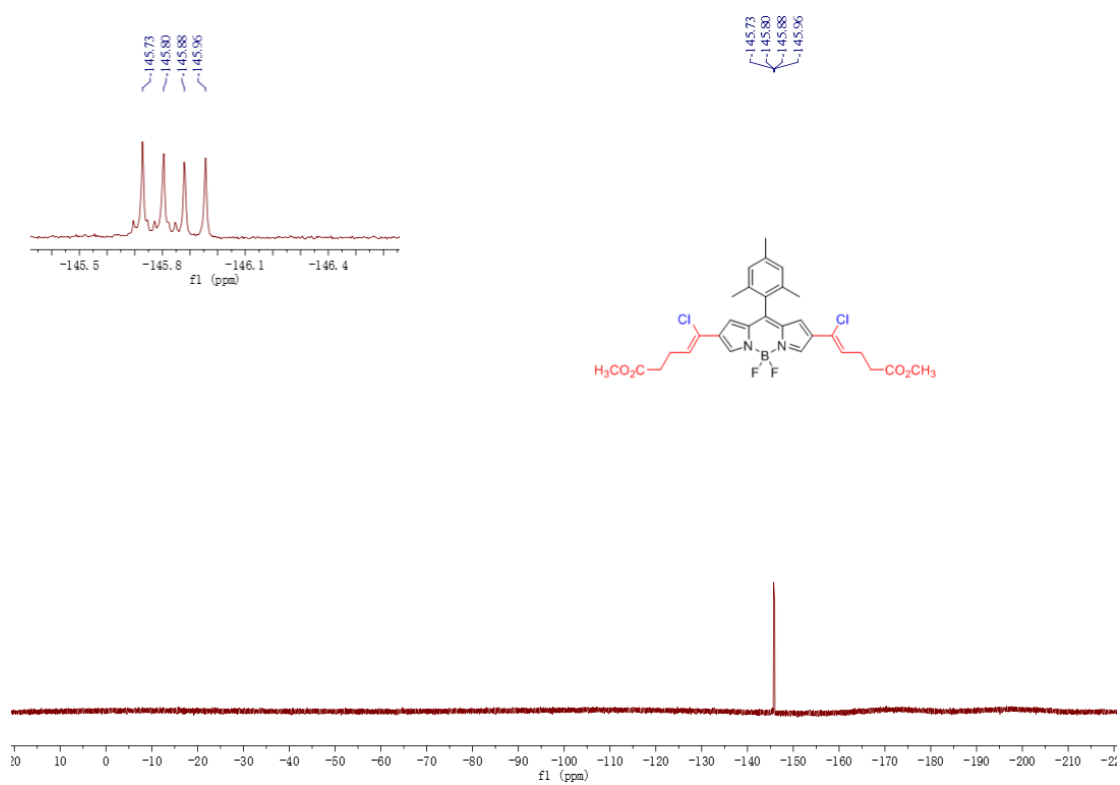

$^1\text{H}$  NMR spectrum of **3f** in  $\text{CDCl}_3$

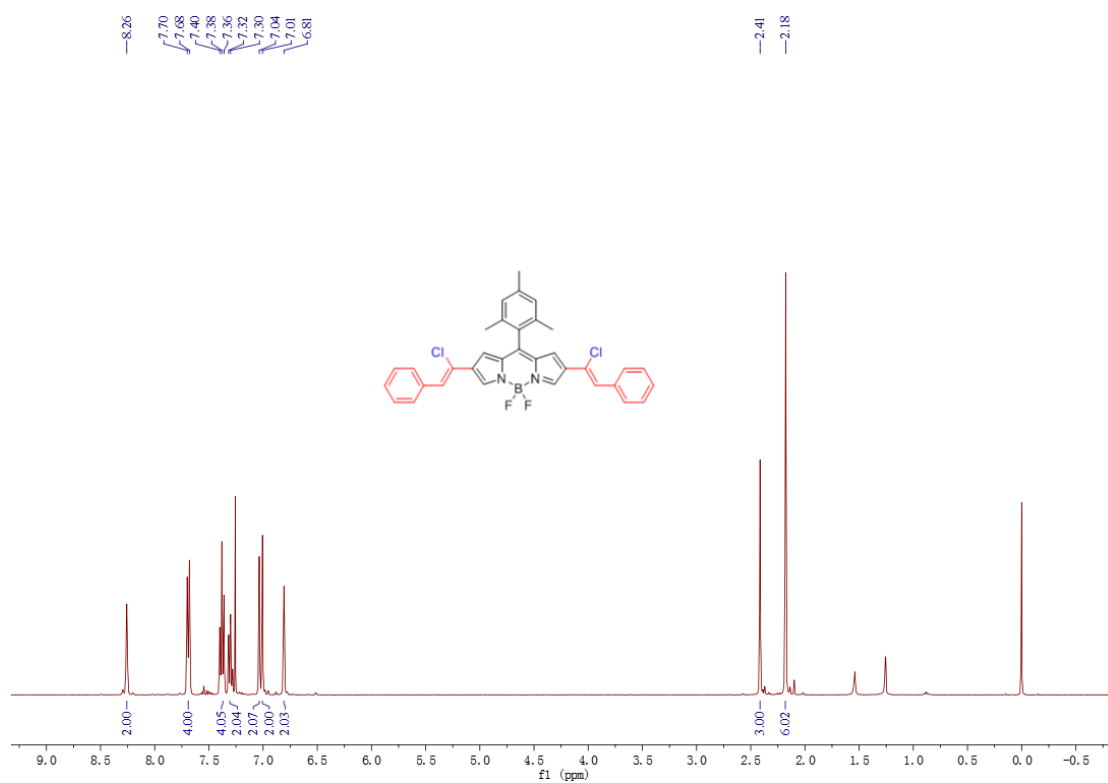

$^{13}\text{C}$  NMR spectrum of **3f** in  $\text{CDCl}_3$

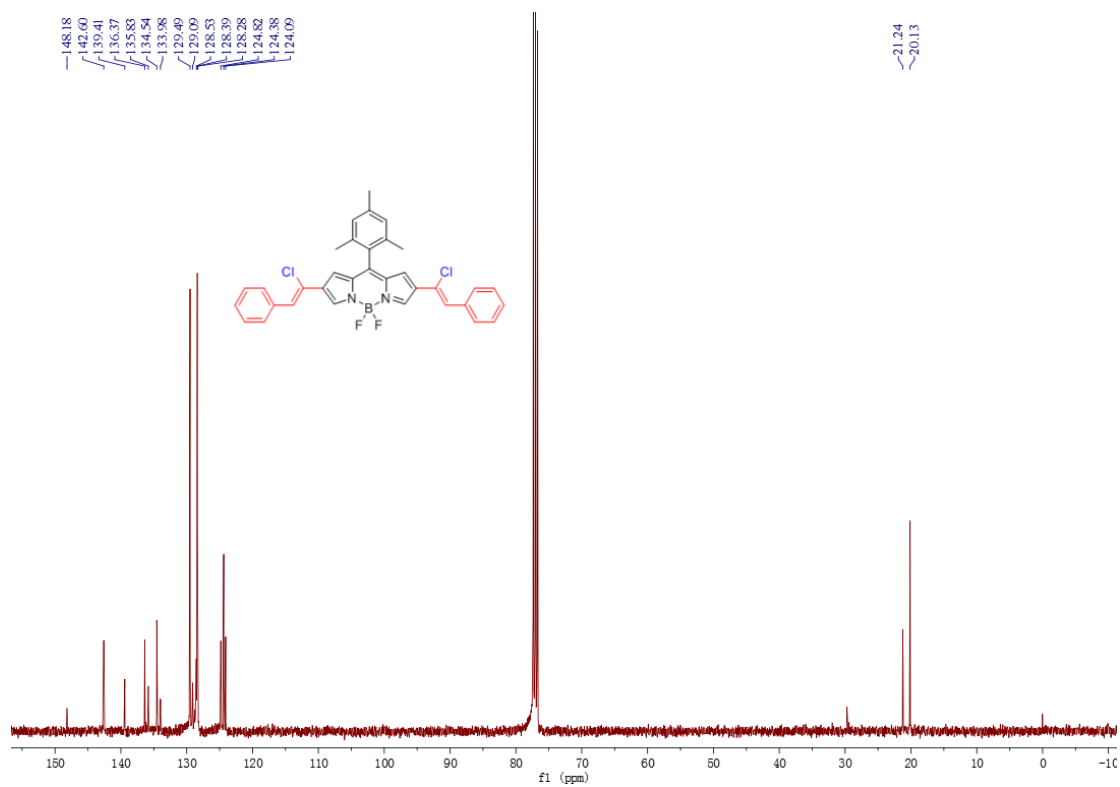

$^{11}\text{B}$  NMR spectrum of **3f** in  $\text{CDCl}_3$

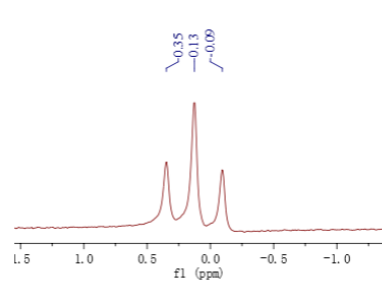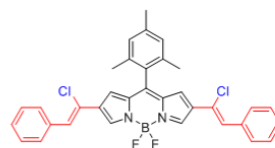

0.35  
0.13  
-0.09

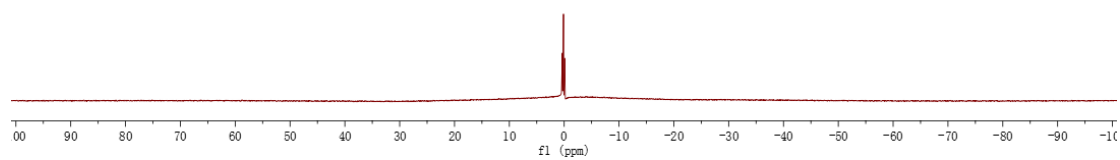

$^{19}\text{F}$  NMR spectrum of **3f** in  $\text{CDCl}_3$

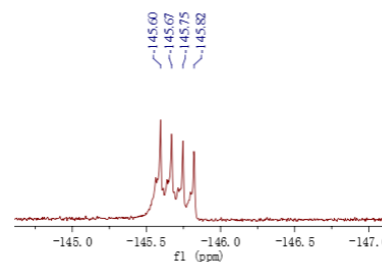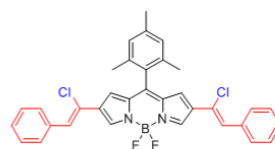

145.60  
145.67  
145.75  
145.82

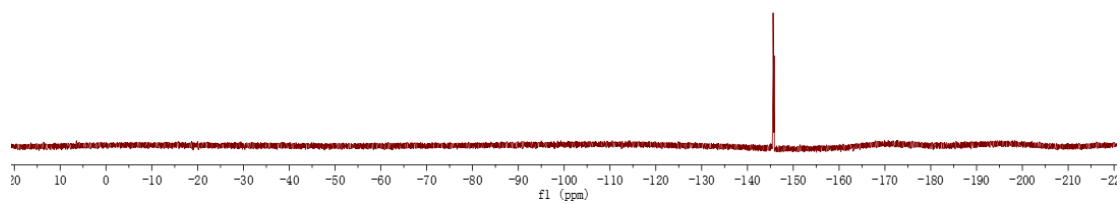

$^1\text{H}$  NMR spectrum of **3g** in  $\text{CDCl}_3$

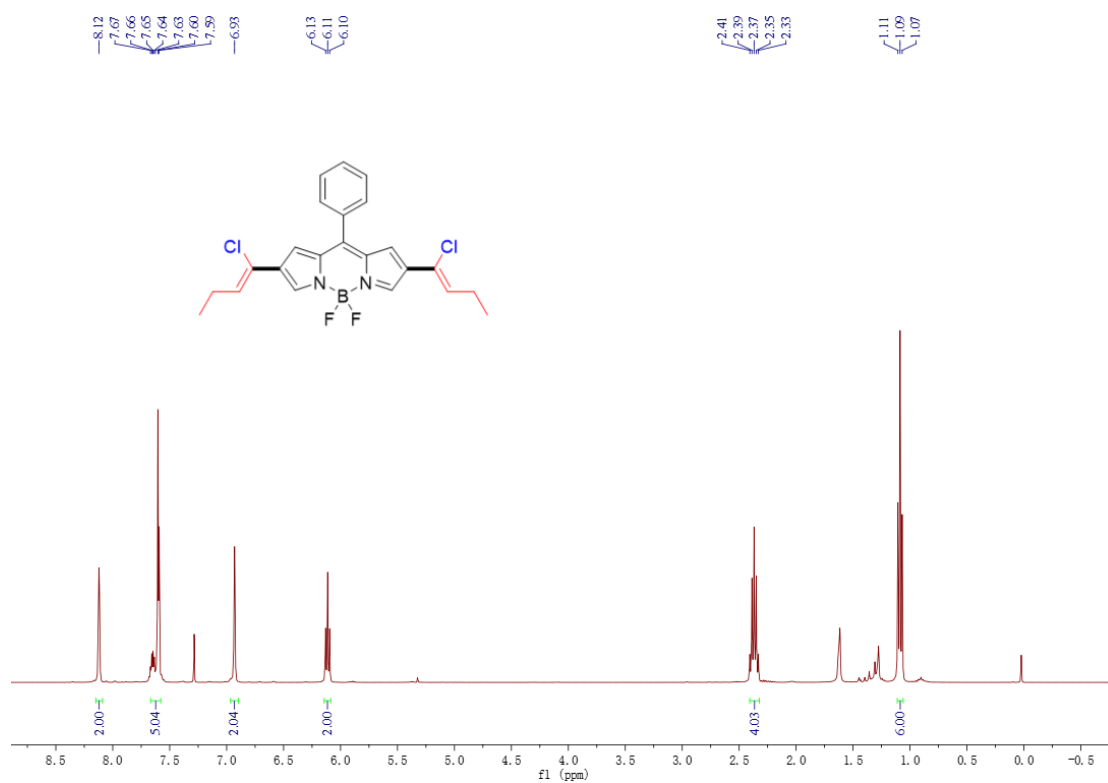

$^{13}\text{C}$  NMR spectrum of **3g** in  $\text{CDCl}_3$

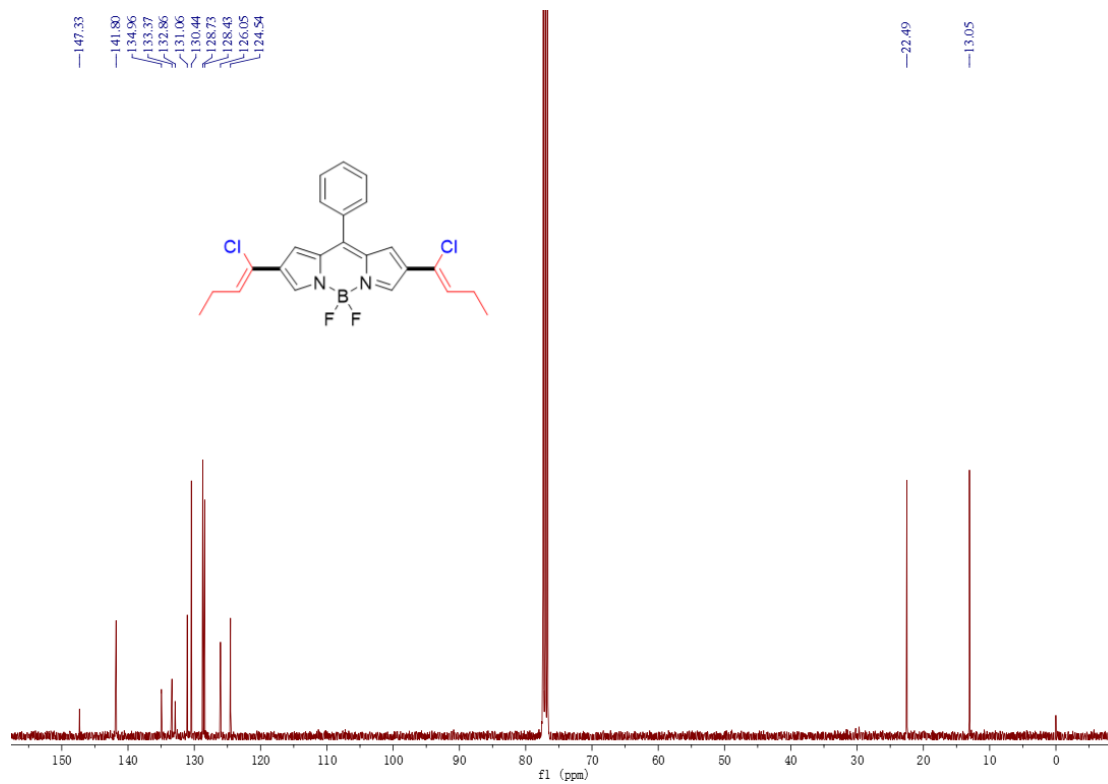



$^{11}\text{B}$  NMR spectrum of **3g** in  $\text{CDCl}_3$

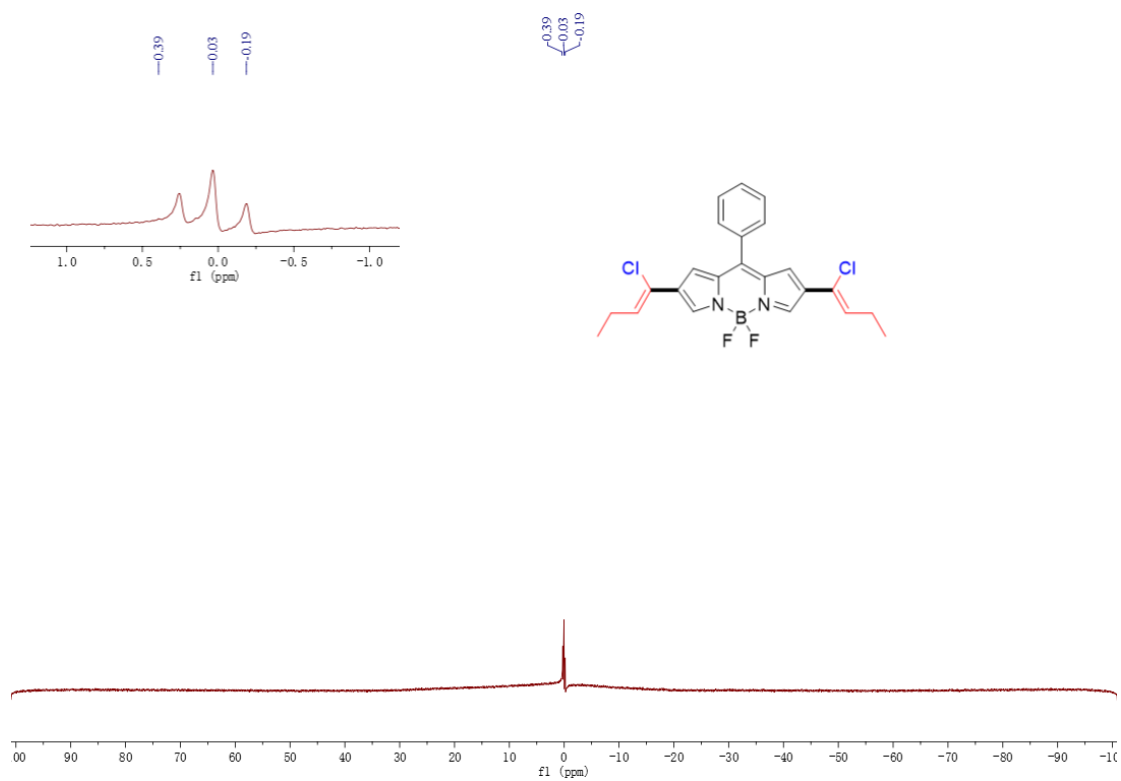

$^{19}\text{F}$  NMR spectrum of **3g** in  $\text{CDCl}_3$

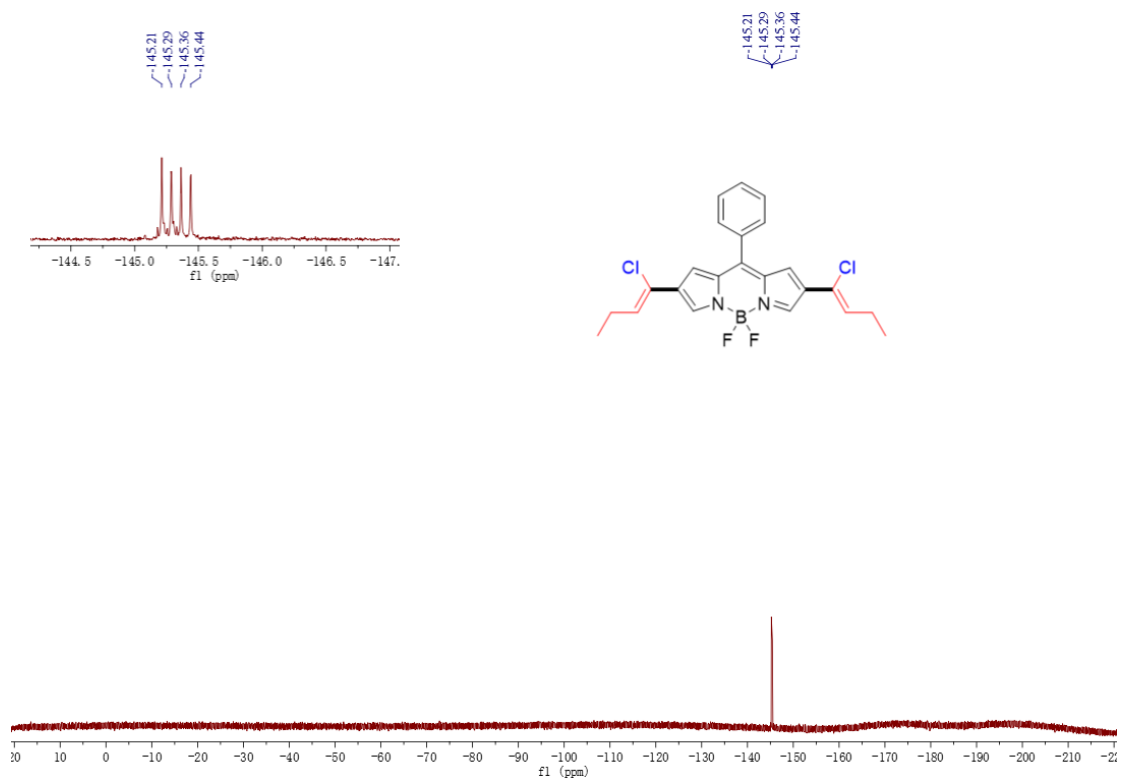

<sup>1</sup>H NMR spectrum of **3h** in CDCl<sub>3</sub>

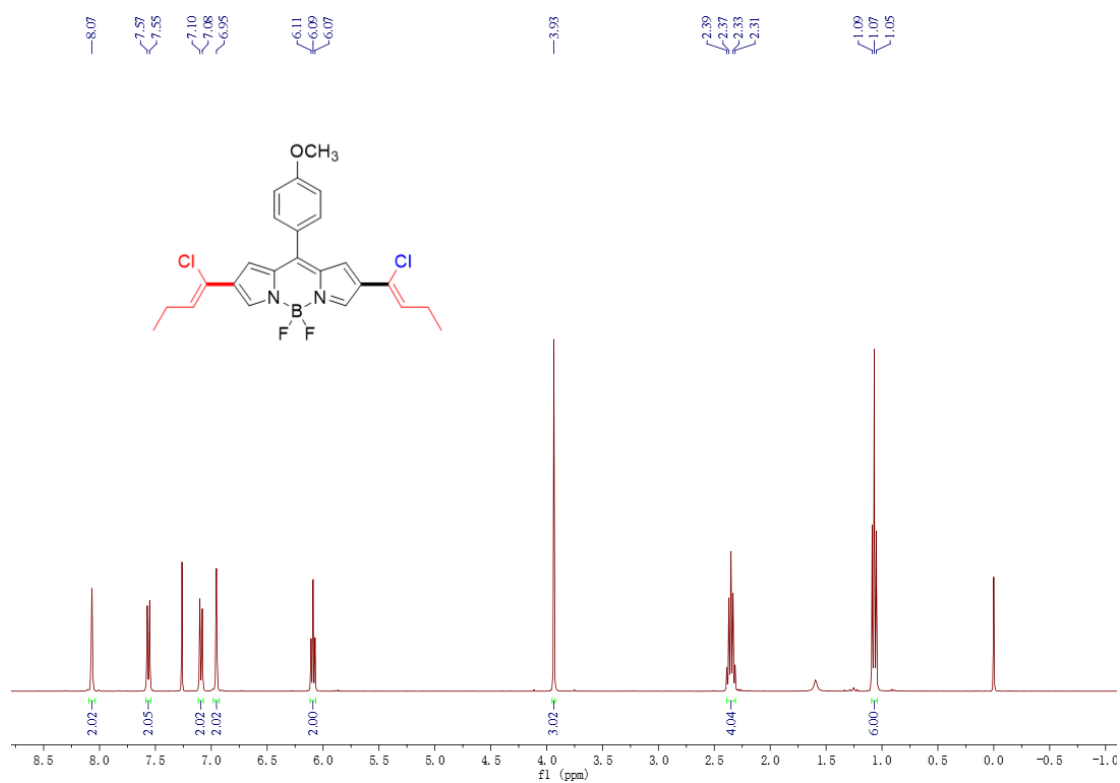

<sup>13</sup>C NMR spectrum of **3h** in CDCl<sub>3</sub>

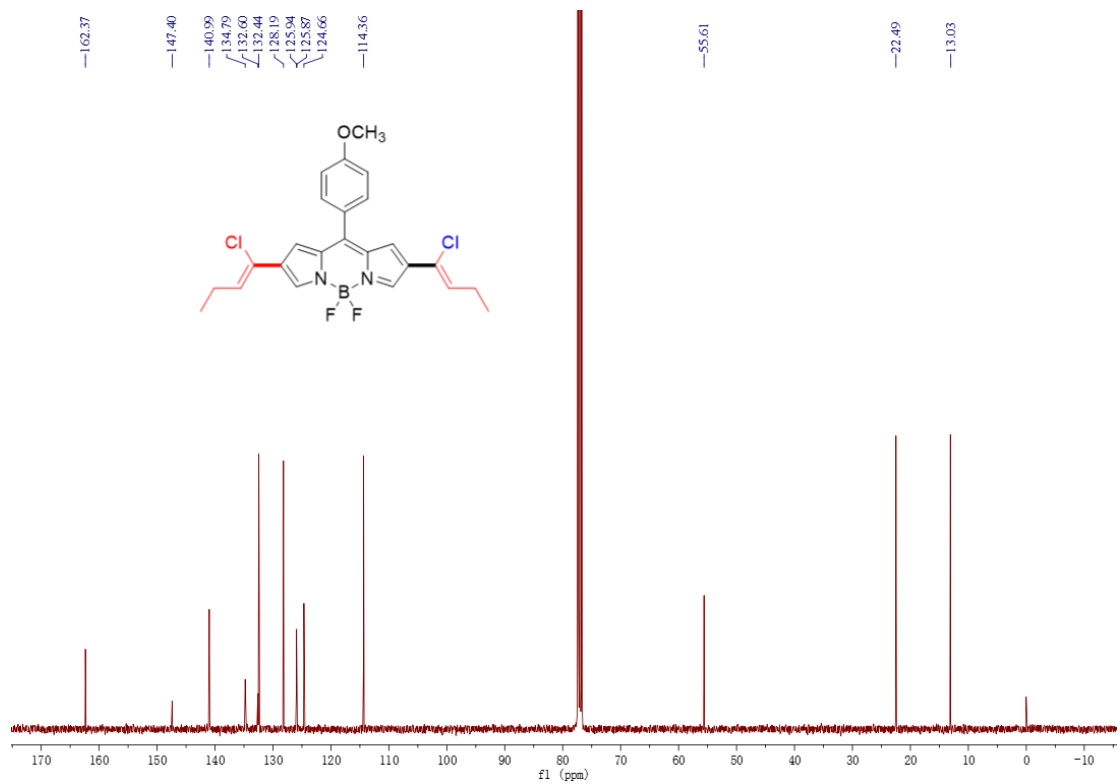

$^{11}\text{B}$  NMR spectrum of **3h** in  $\text{CDCl}_3$

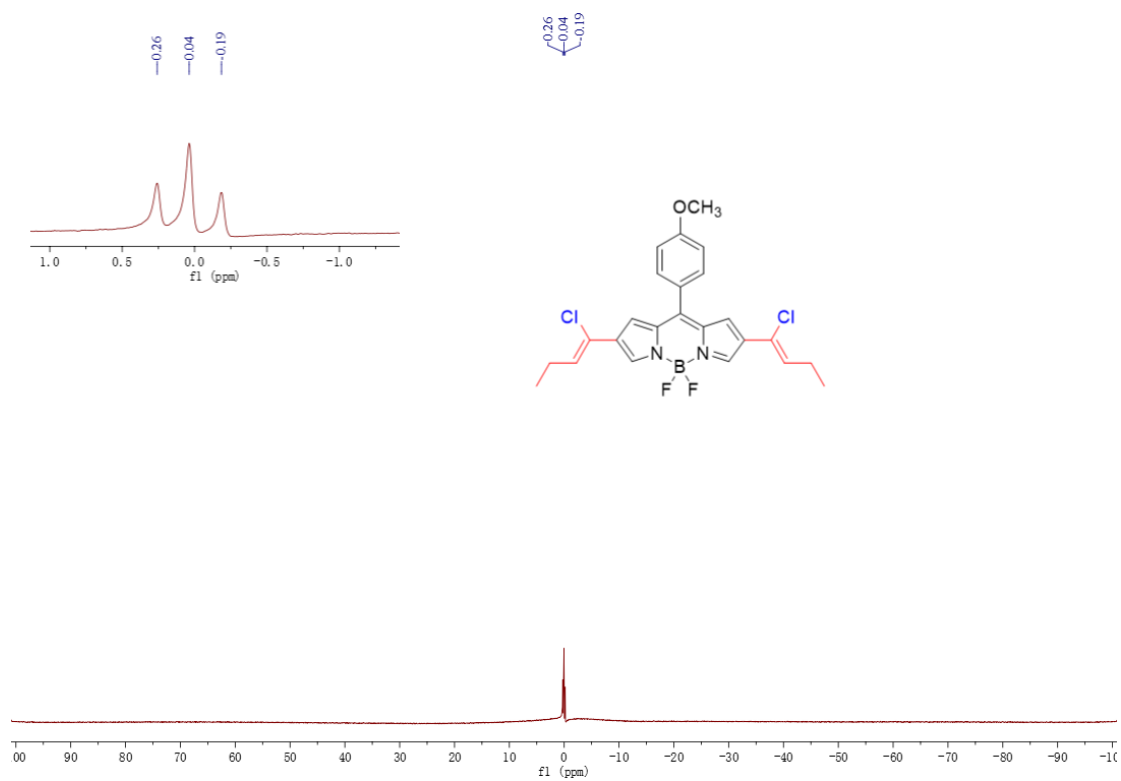

$^{19}\text{F}$  NMR spectrum of **3h** in  $\text{CDCl}_3$

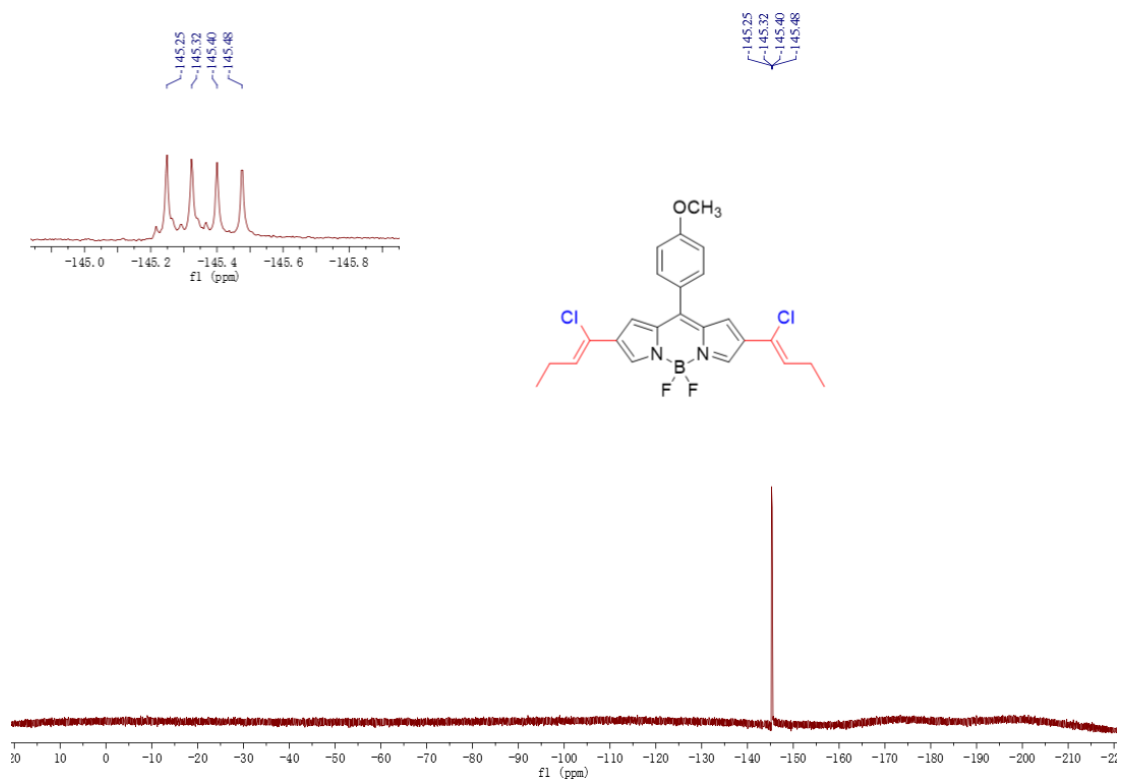

$^1\text{H}$  NMR spectrum of **3i** in  $\text{CDCl}_3$

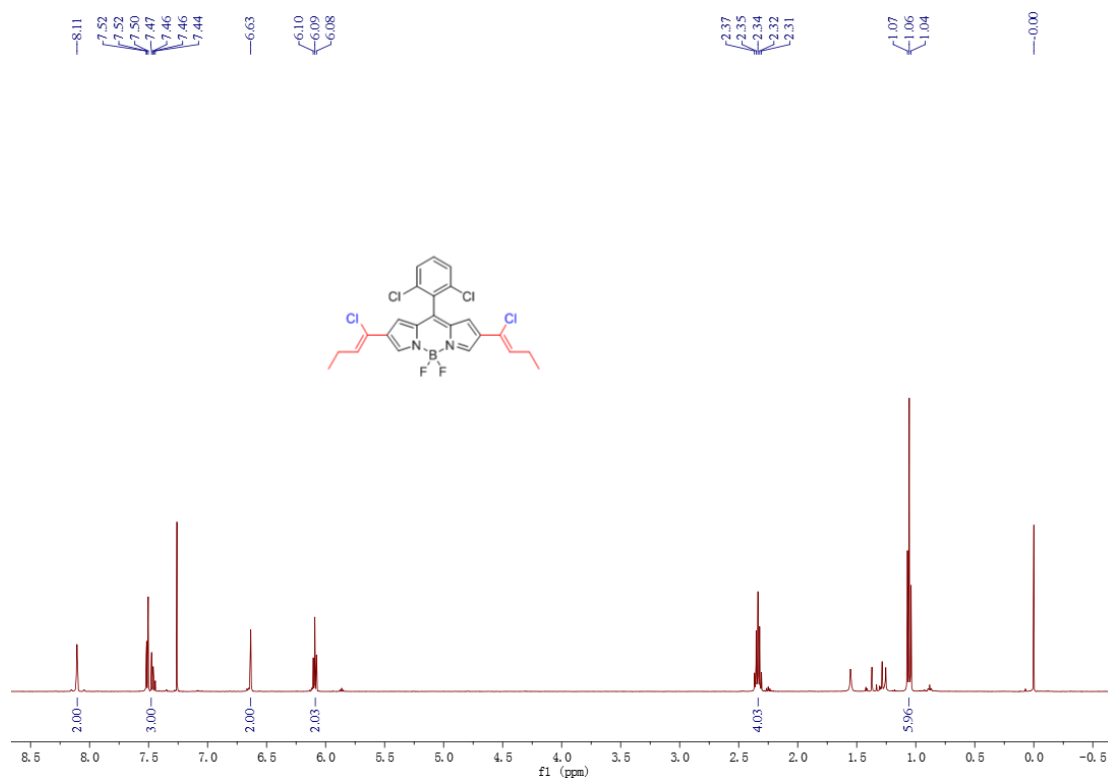

$^{13}\text{C}$  NMR spectrum of **3i** in  $\text{CDCl}_3$

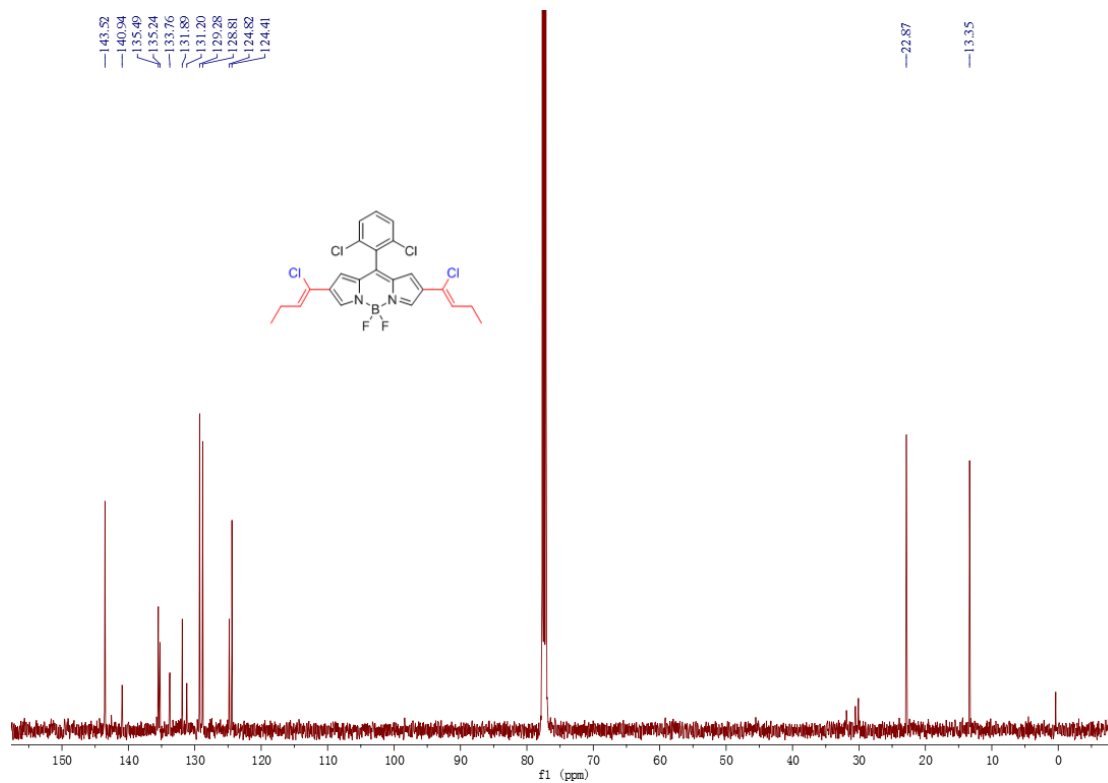

$^{11}\text{B}$  NMR spectrum of **3i** in  $\text{CDCl}_3$

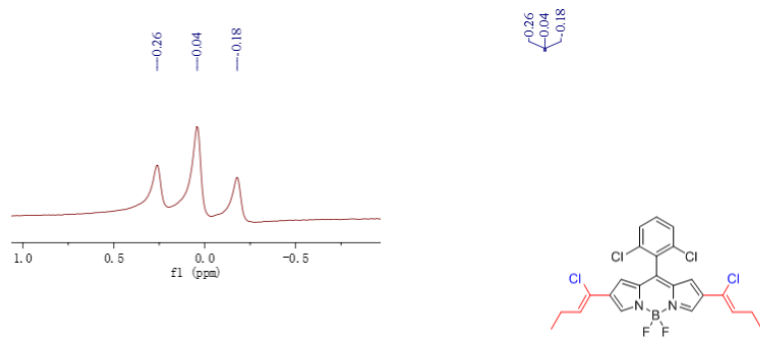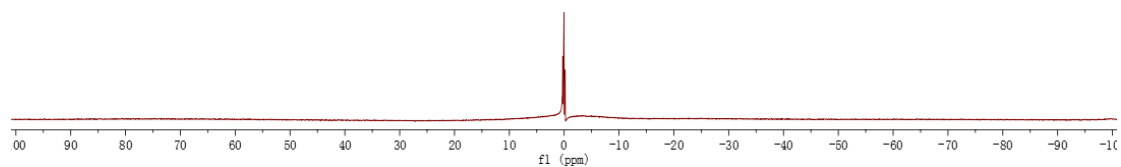

$^{19}\text{F}$  NMR spectrum of **3i** in  $\text{CDCl}_3$

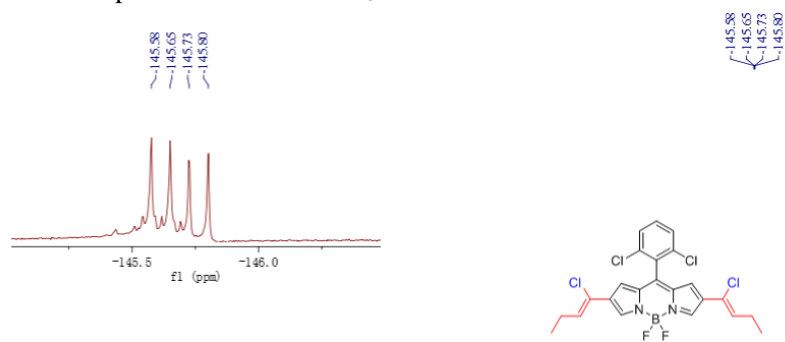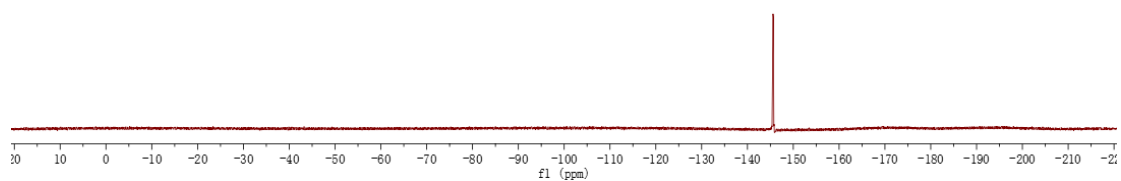

$^1\text{H}$  NMR spectrum of **4a** in  $\text{CDCl}_3$

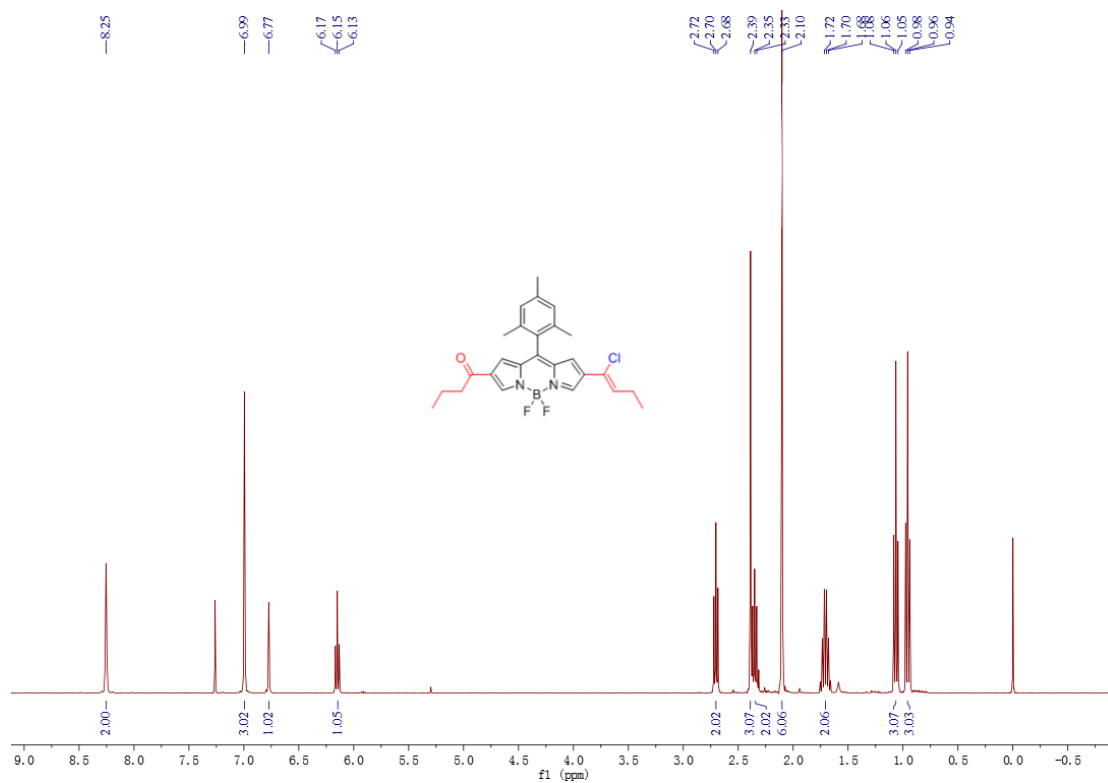

$^{13}\text{C}$  NMR spectrum of **4a** in  $\text{CDCl}_3$

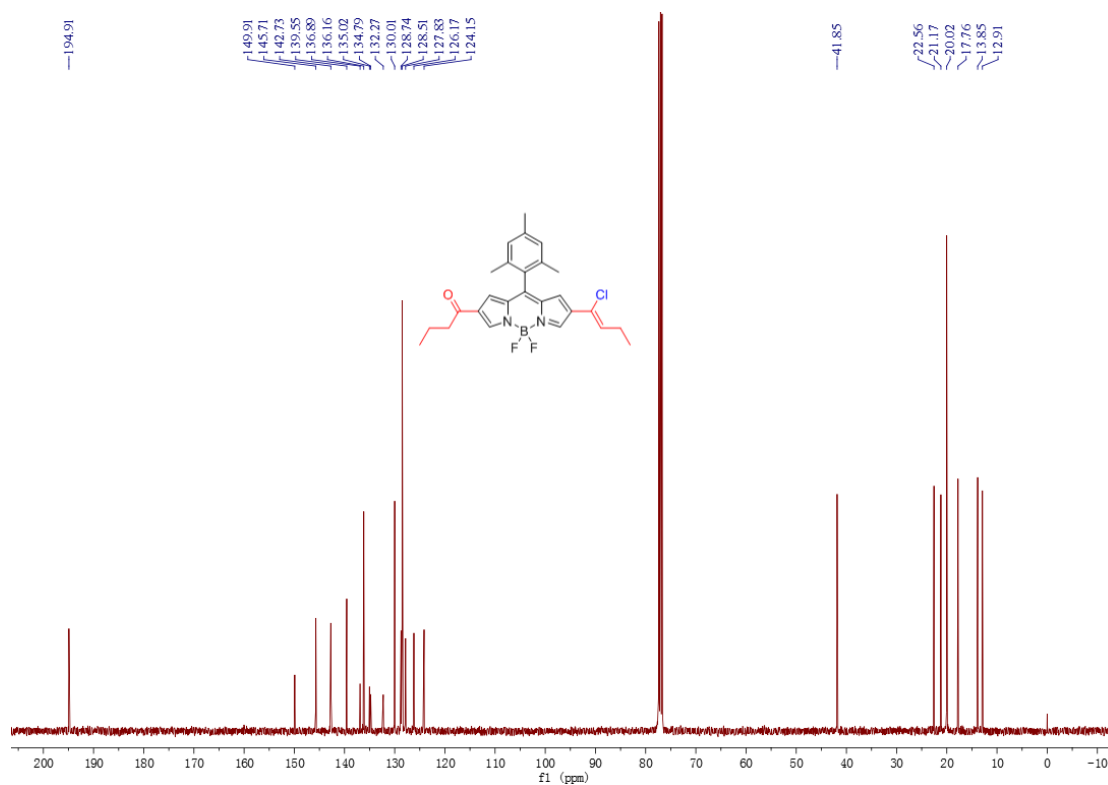

$^{11}\text{B}$  NMR spectrum of **4a** in  $\text{CDCl}_3$

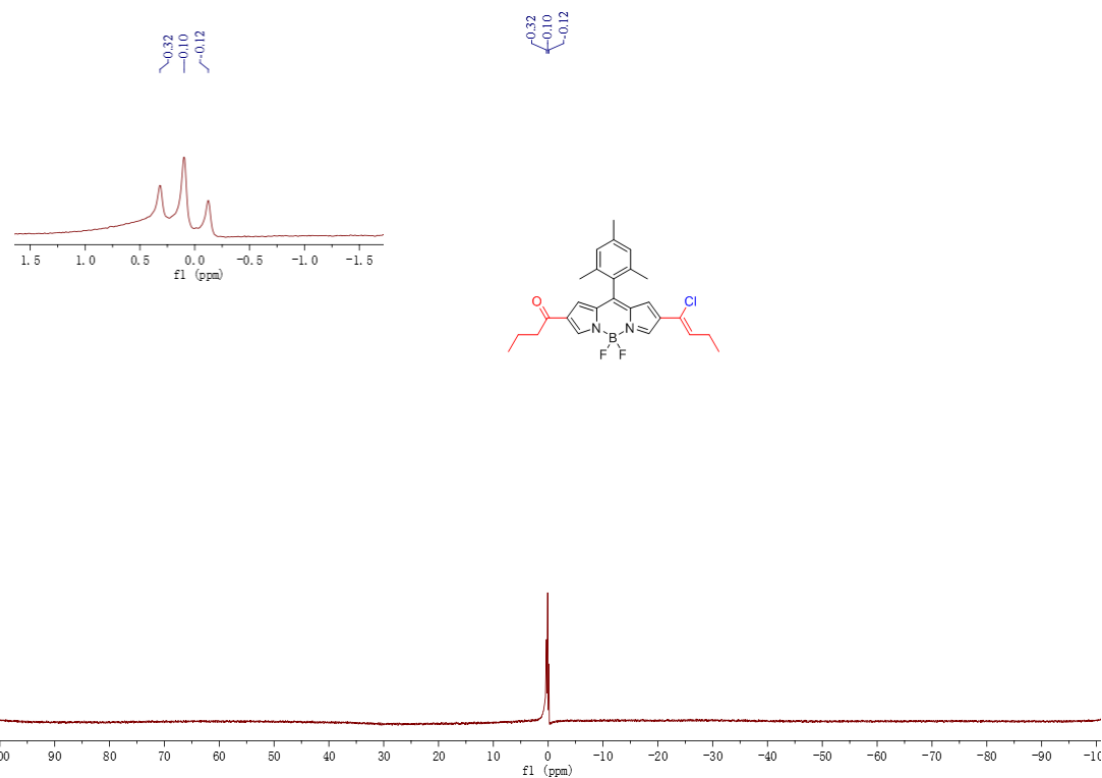

$^{19}\text{F}$  NMR spectrum of **4a** in  $\text{CDCl}_3$

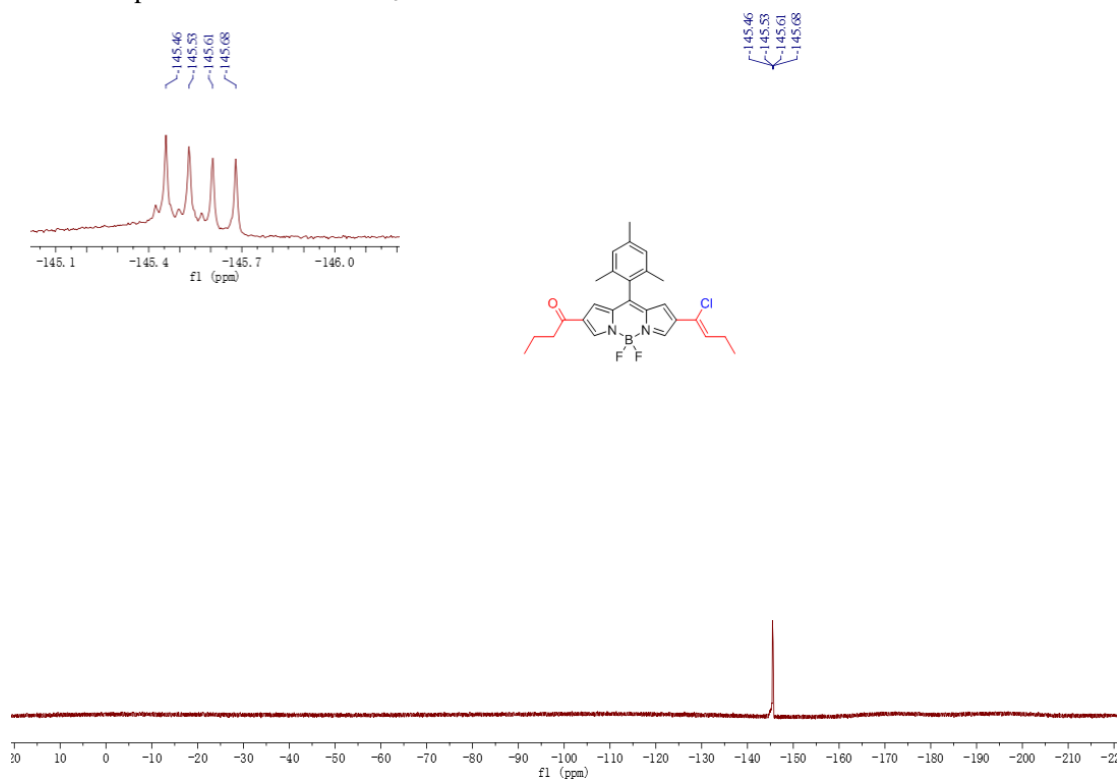

$^1\text{H}$  NMR spectrum of **4b** in  $\text{CDCl}_3$

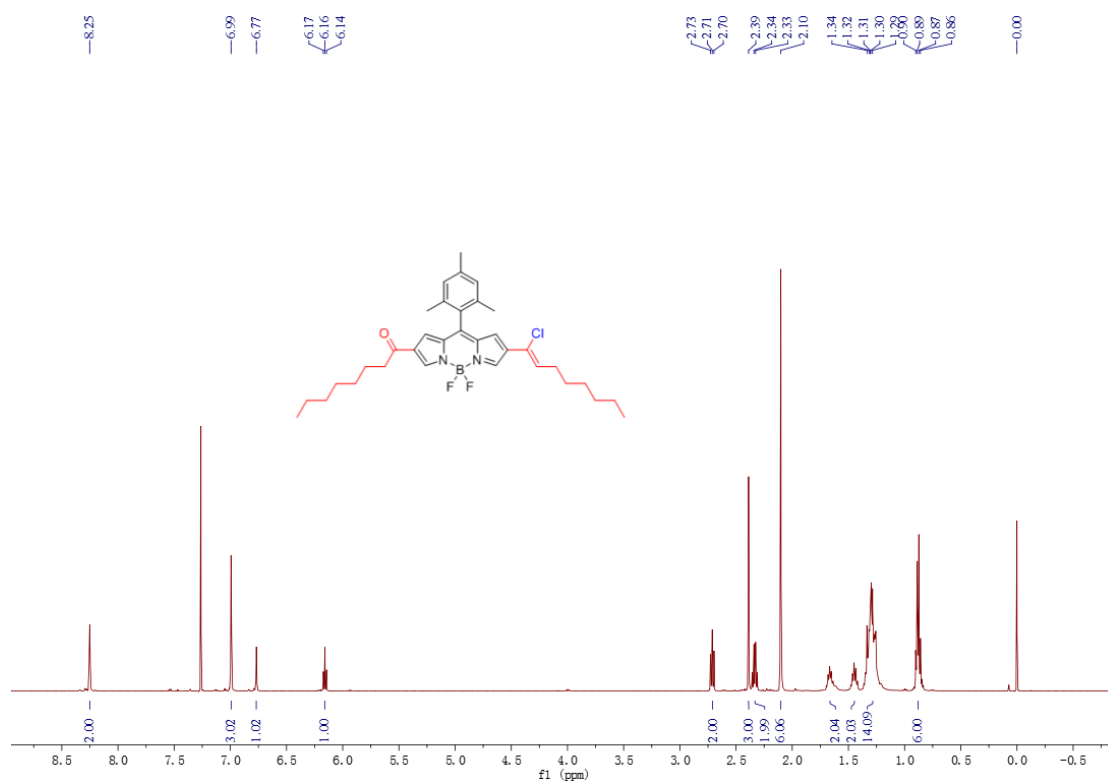

$^{13}\text{C}$  NMR spectrum of **4b** in  $\text{CDCl}_3$

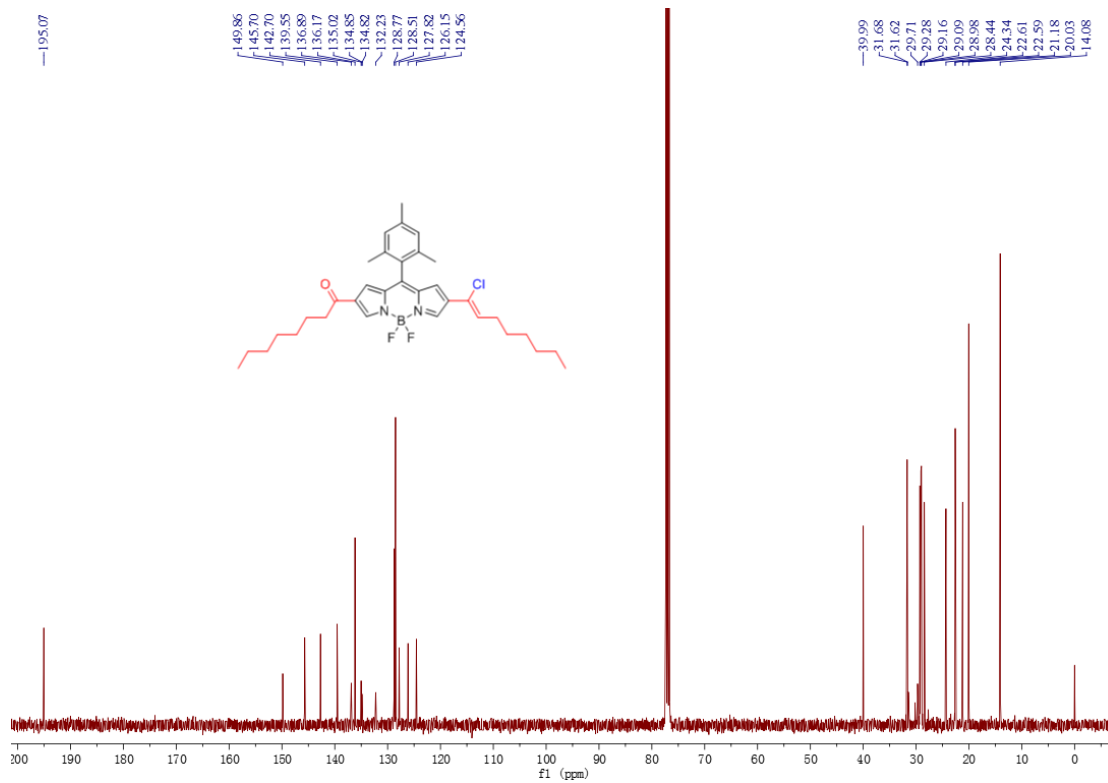



$^{11}\text{B}$  NMR spectrum of **4b** in  $\text{CDCl}_3$

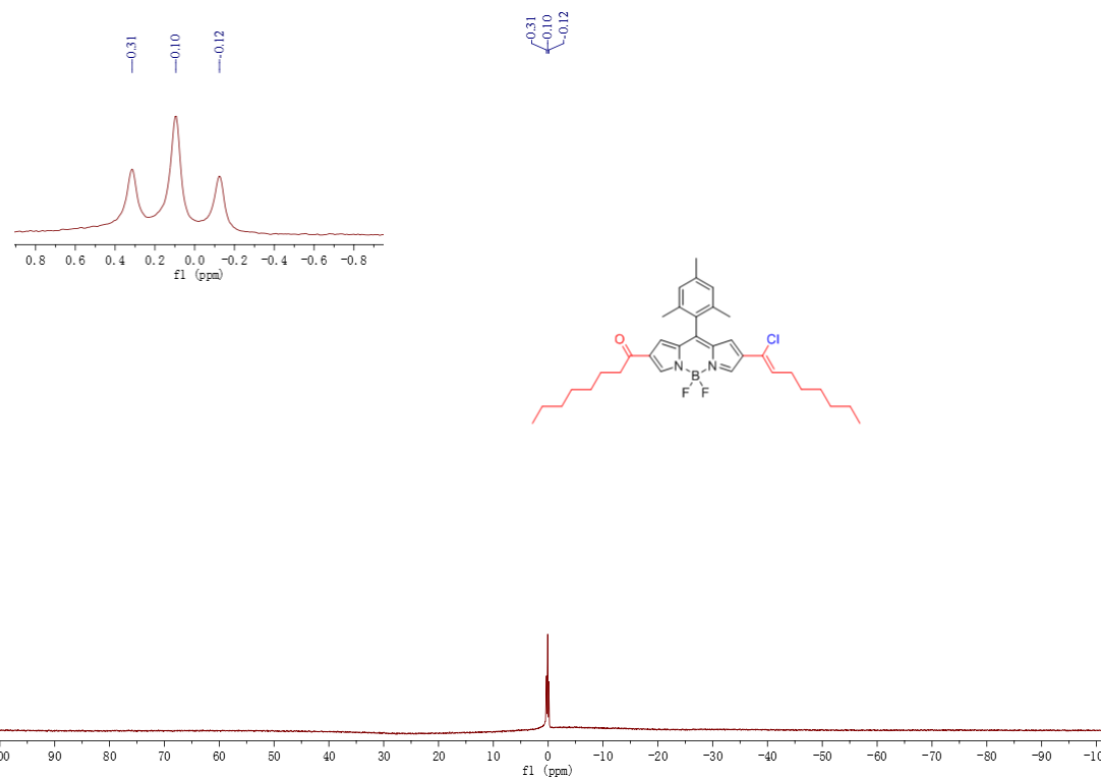

$^{19}\text{F}$  NMR spectrum of **4b** in  $\text{CDCl}_3$

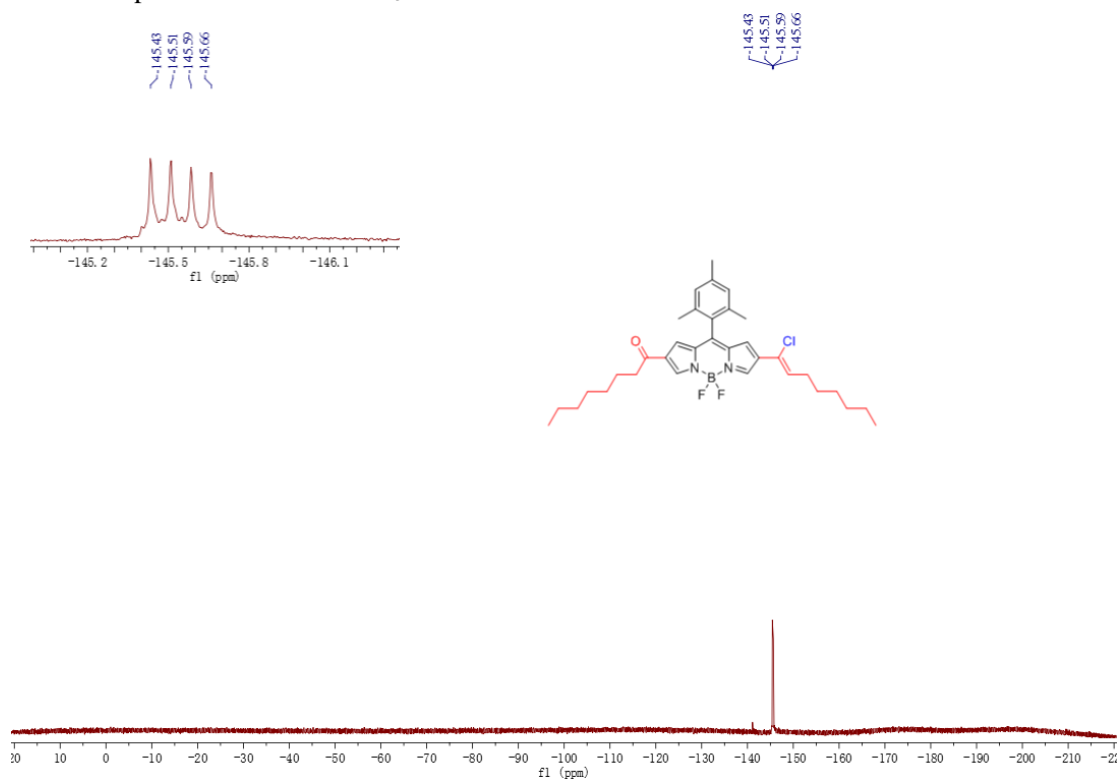

$^1\text{H}$  NMR spectrum of **4c** in  $\text{CDCl}_3$

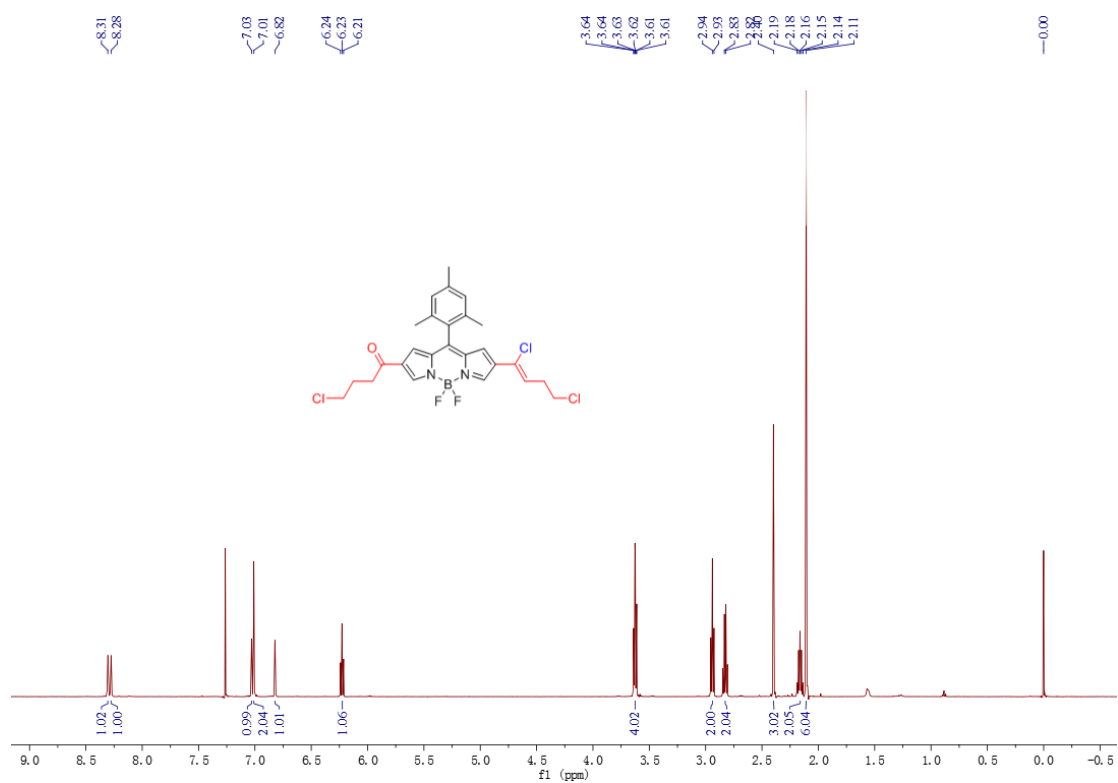

$^{13}\text{C}$  NMR spectrum of **4c** in  $\text{CDCl}_3$

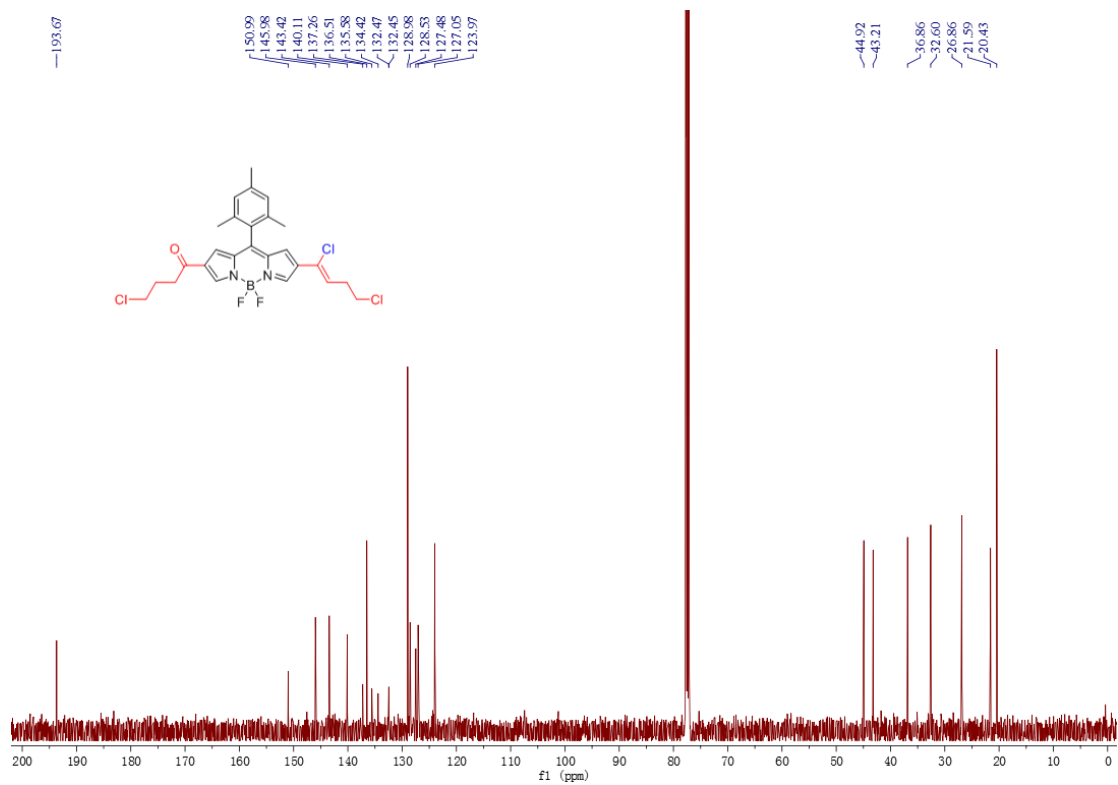

$^{11}\text{B}$  NMR spectrum of **4c** in  $\text{CDCl}_3$

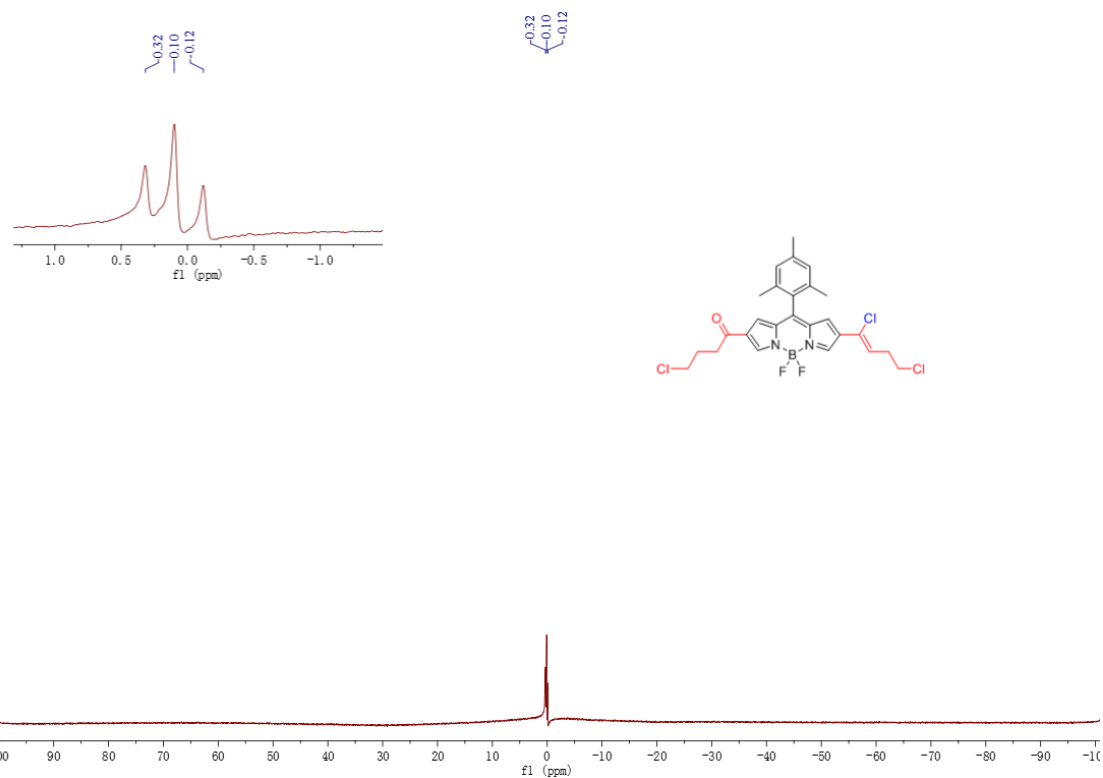

$^{19}\text{F}$  NMR spectrum of **4c** in  $\text{CDCl}_3$

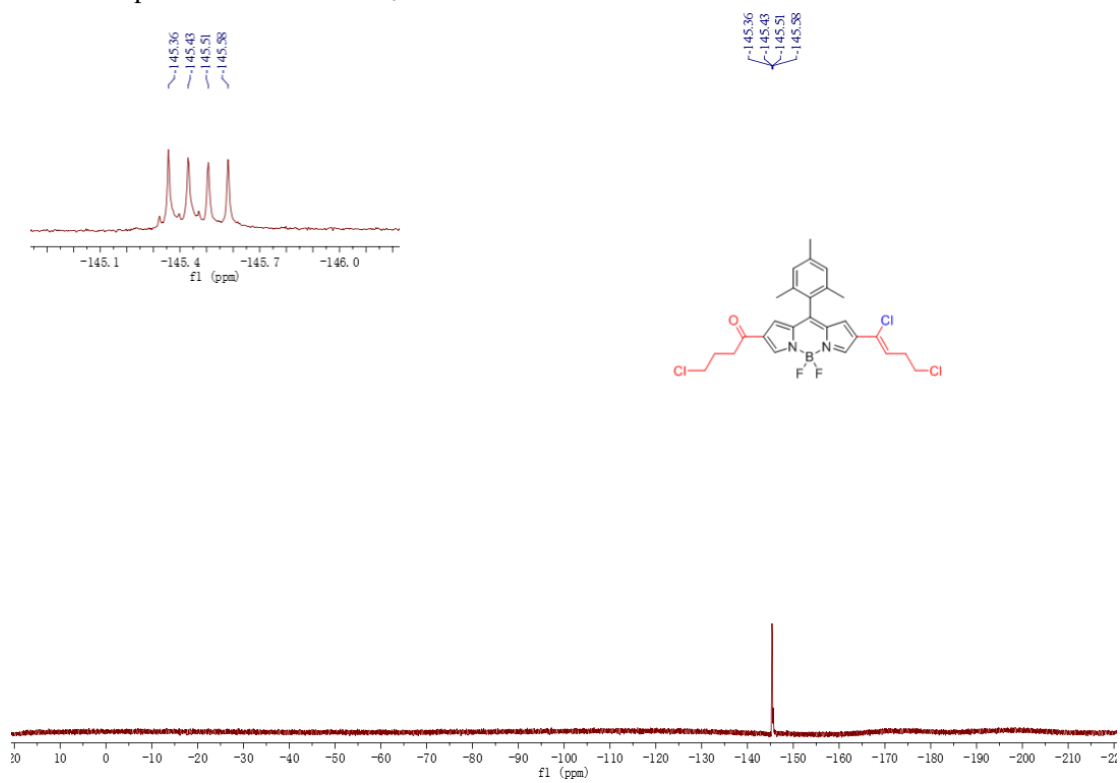

$^1\text{H}$  NMR spectrum of **4d** in  $\text{CDCl}_3$

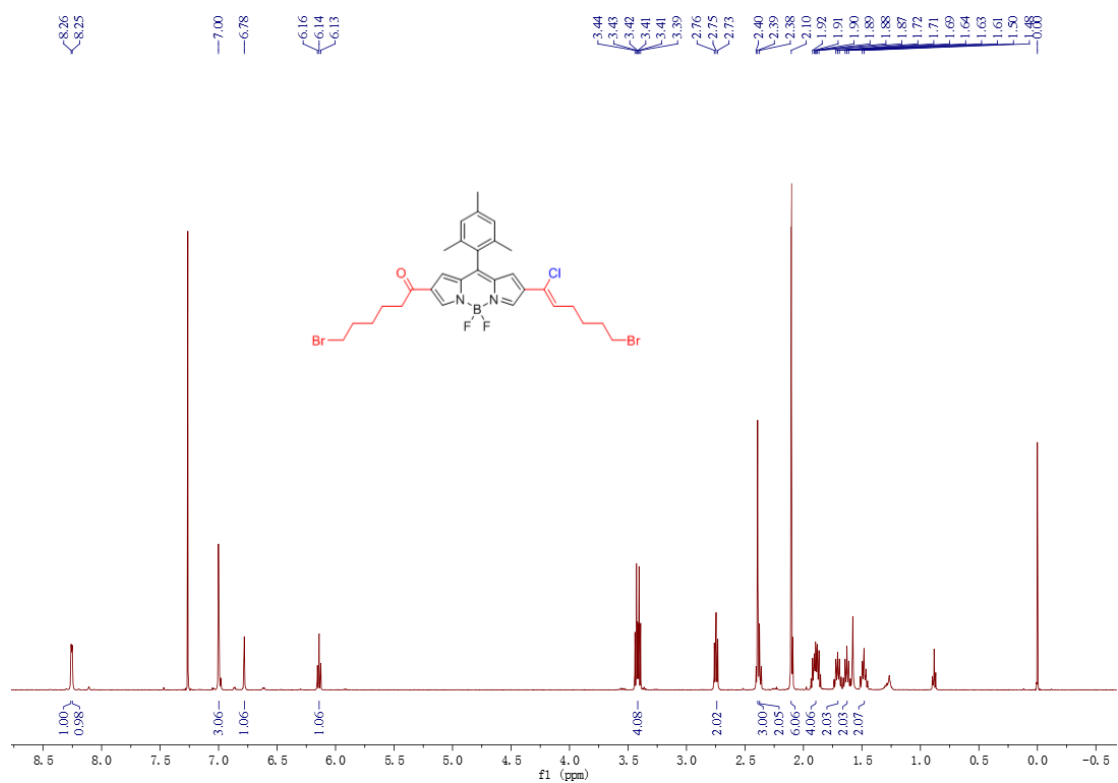

$^{13}\text{C}$  NMR spectrum of **4d** in  $\text{CDCl}_3$

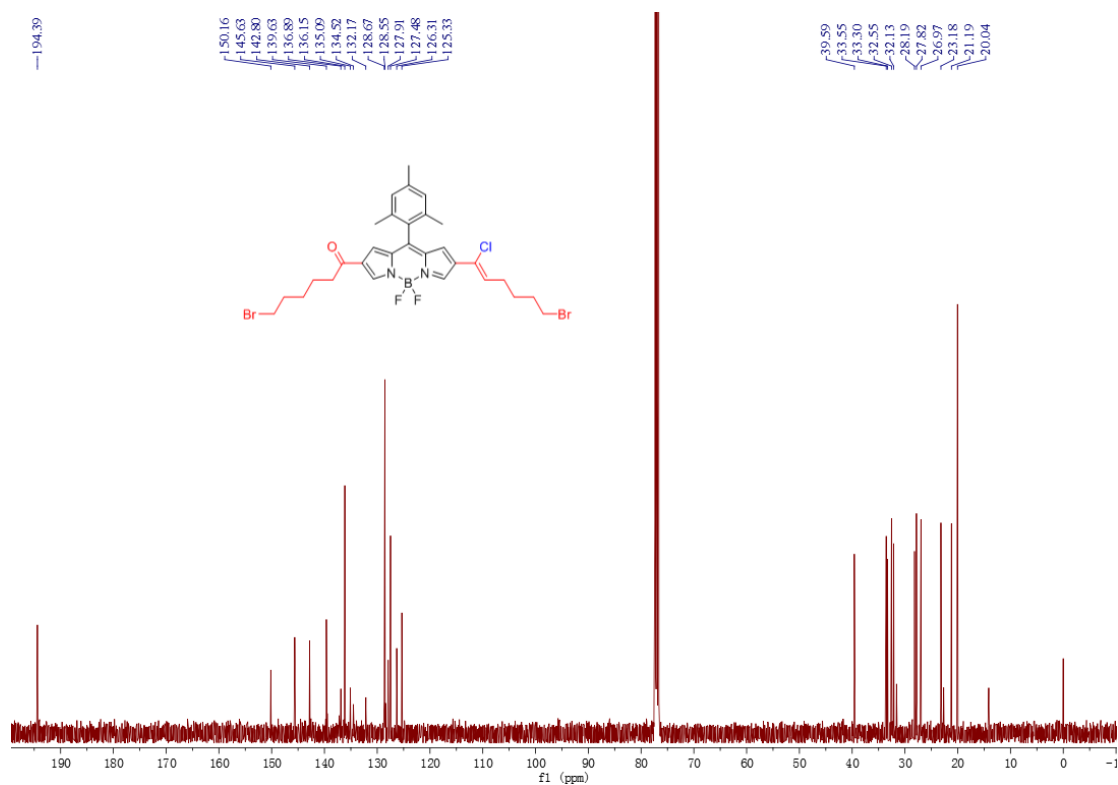

$^{11}\text{B}$  NMR spectrum of **4d** in  $\text{CDCl}_3$

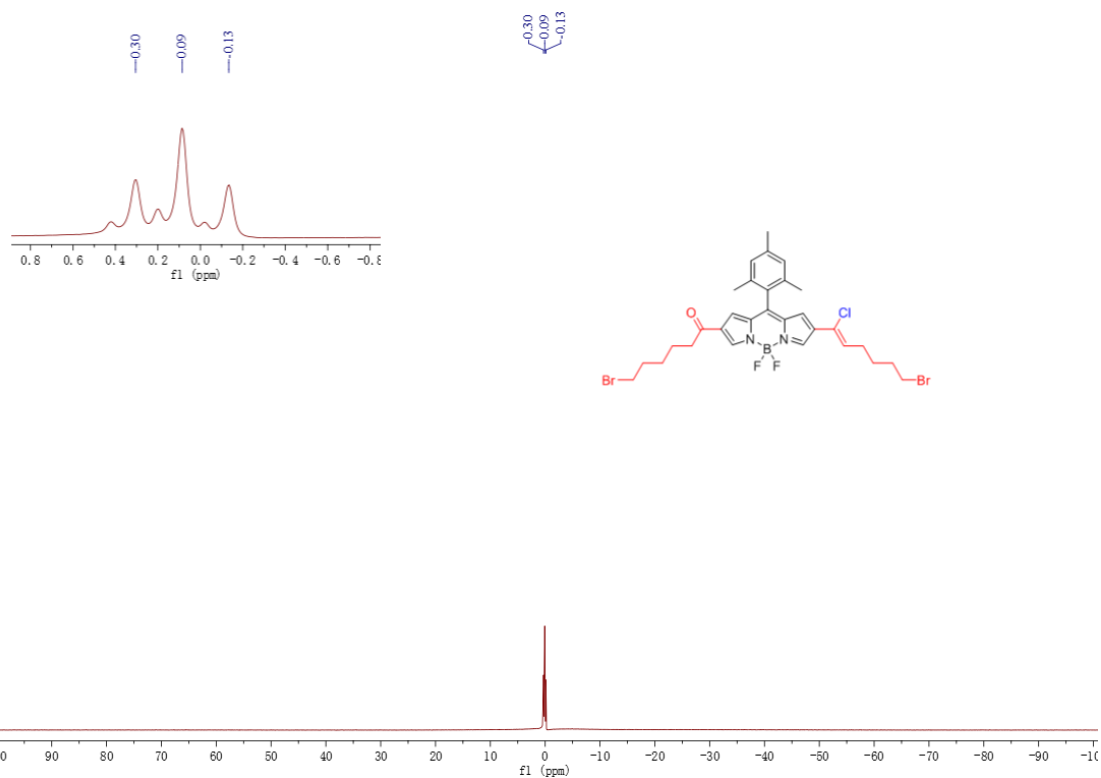

$^{19}\text{F}$  NMR spectrum of **4d** in  $\text{CDCl}_3$

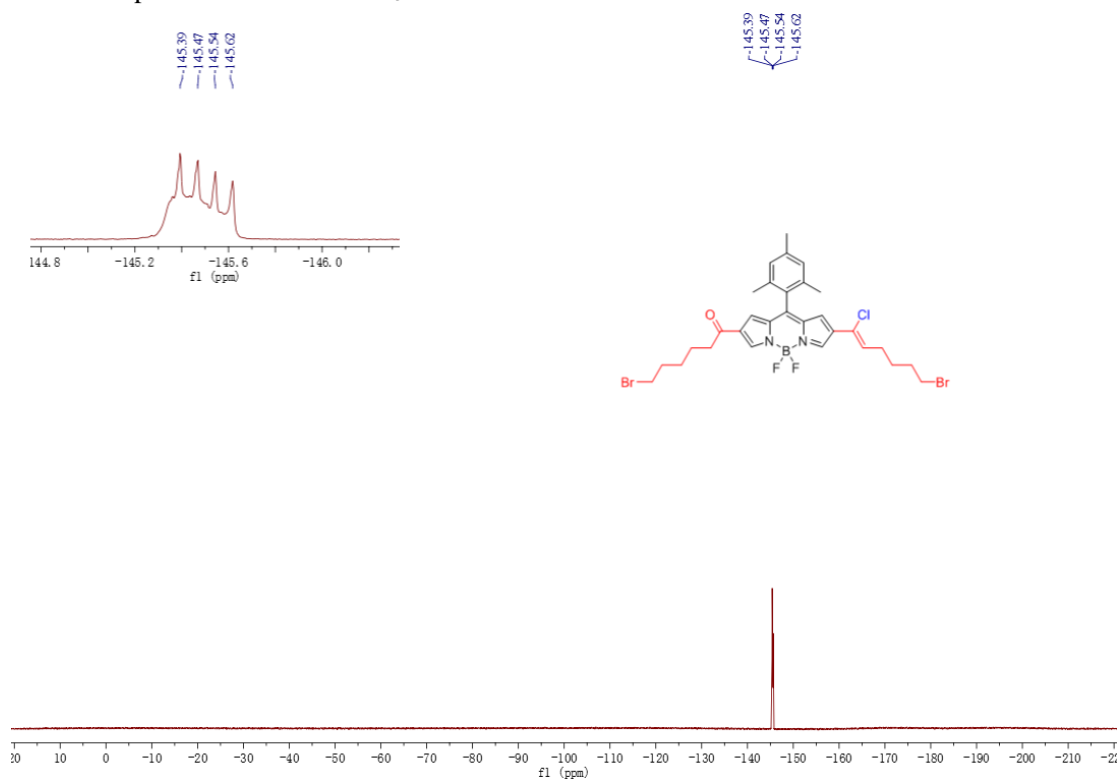

$^1\text{H}$  NMR spectrum of **4e** in  $\text{CDCl}_3$

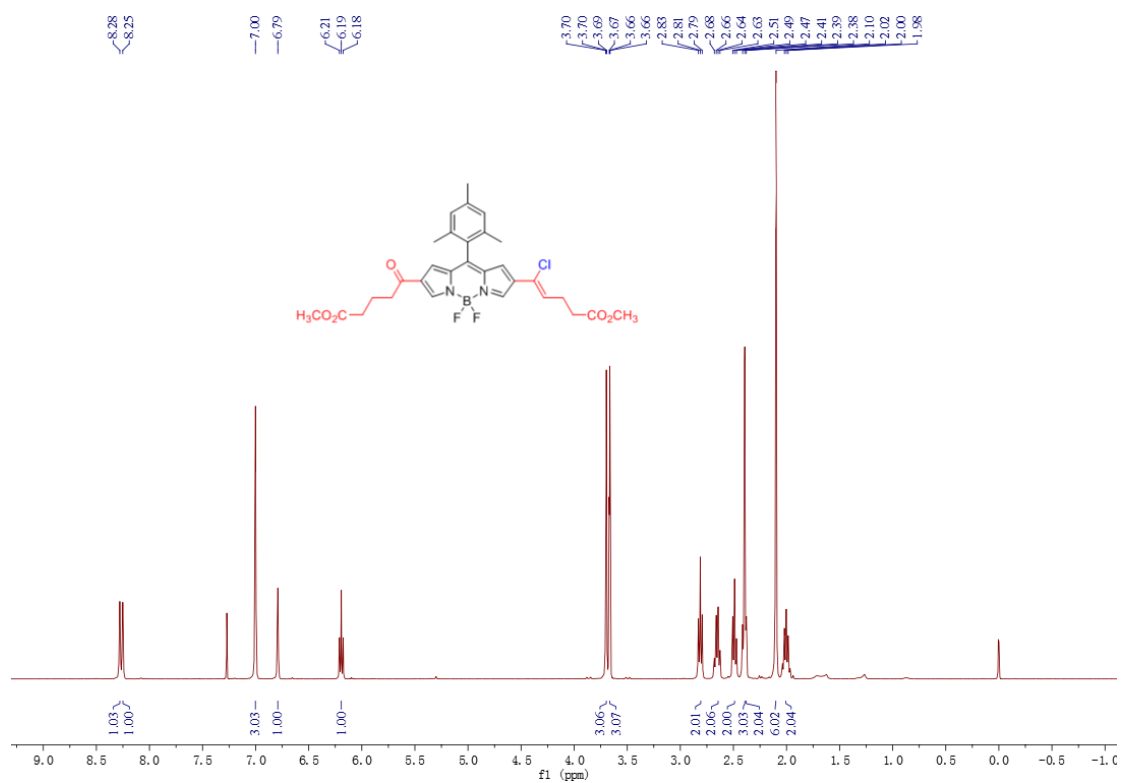

$^{13}\text{C}$  NMR spectrum of **4e** in  $\text{CDCl}_3$

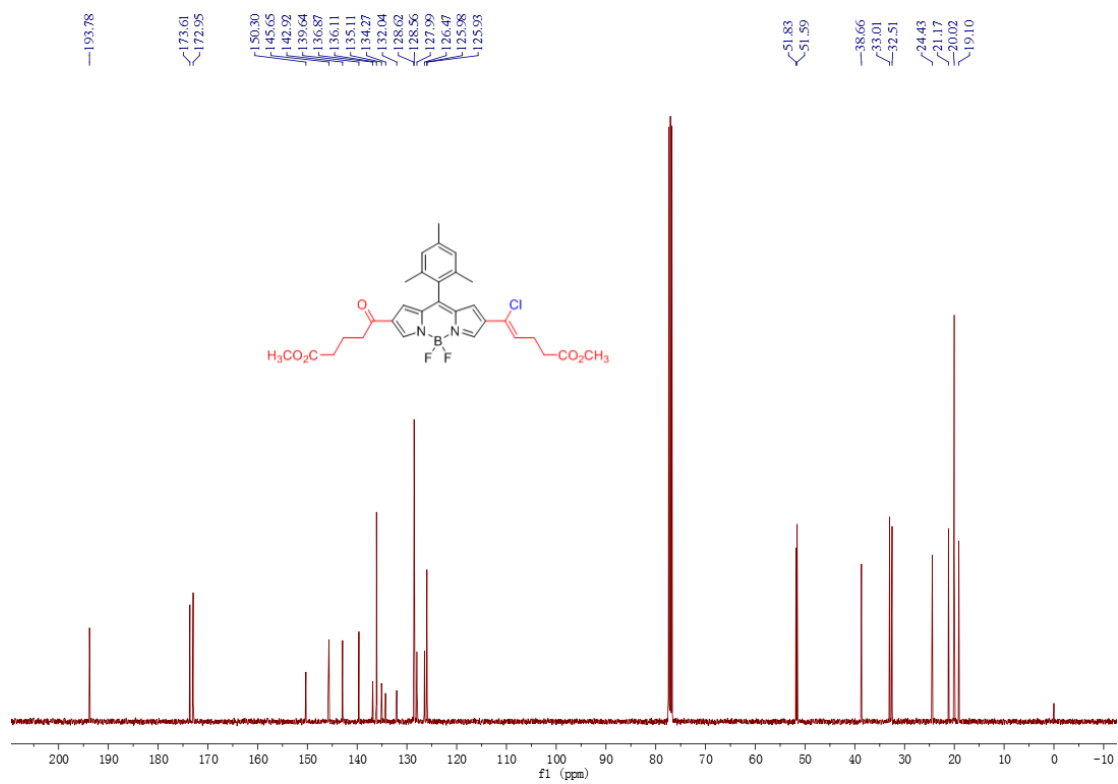

$^{11}\text{B}$  NMR spectrum of **4e** in  $\text{CDCl}_3$

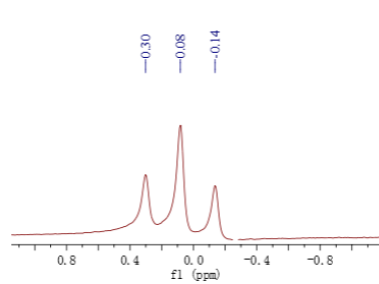

0.30  
0.08  
-0.14

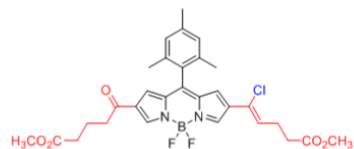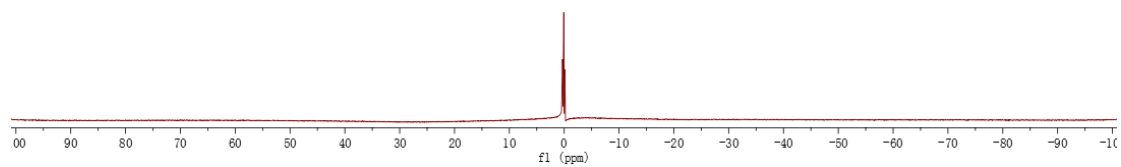

$^{19}\text{F}$  NMR spectrum of **4e** in  $\text{CDCl}_3$

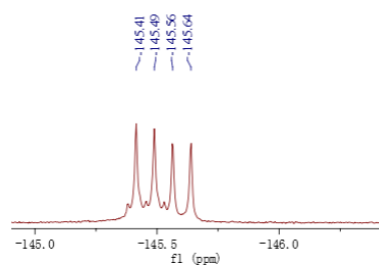

145.41  
145.49  
145.56  
145.64

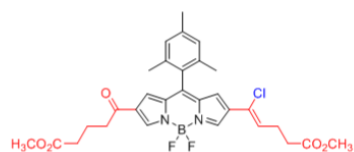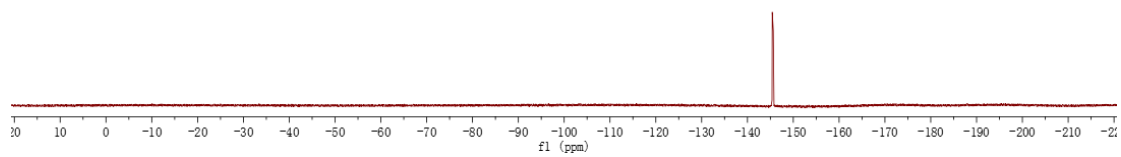

$^1\text{H}$  NMR spectrum of **4f** in  $\text{CDCl}_3$

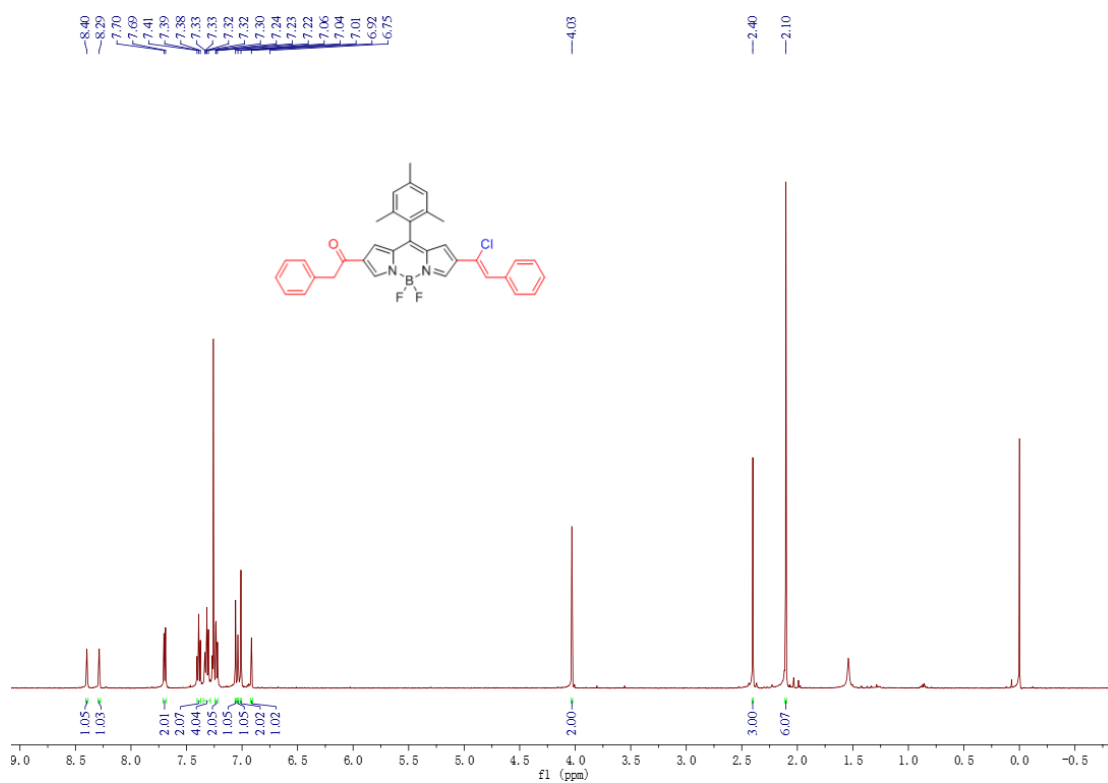

$^{13}\text{C}$  NMR spectrum of **4f** in  $\text{CDCl}_3$

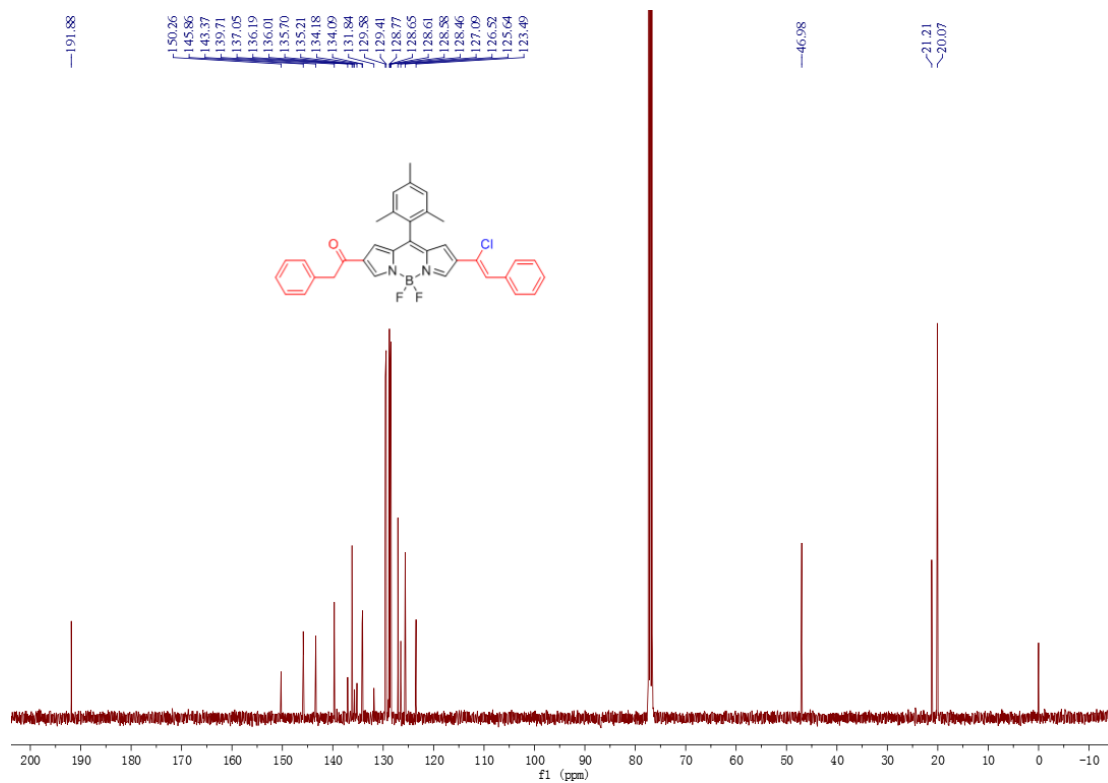



$^{11}\text{B}$  NMR spectrum of **4f** in  $\text{CDCl}_3$

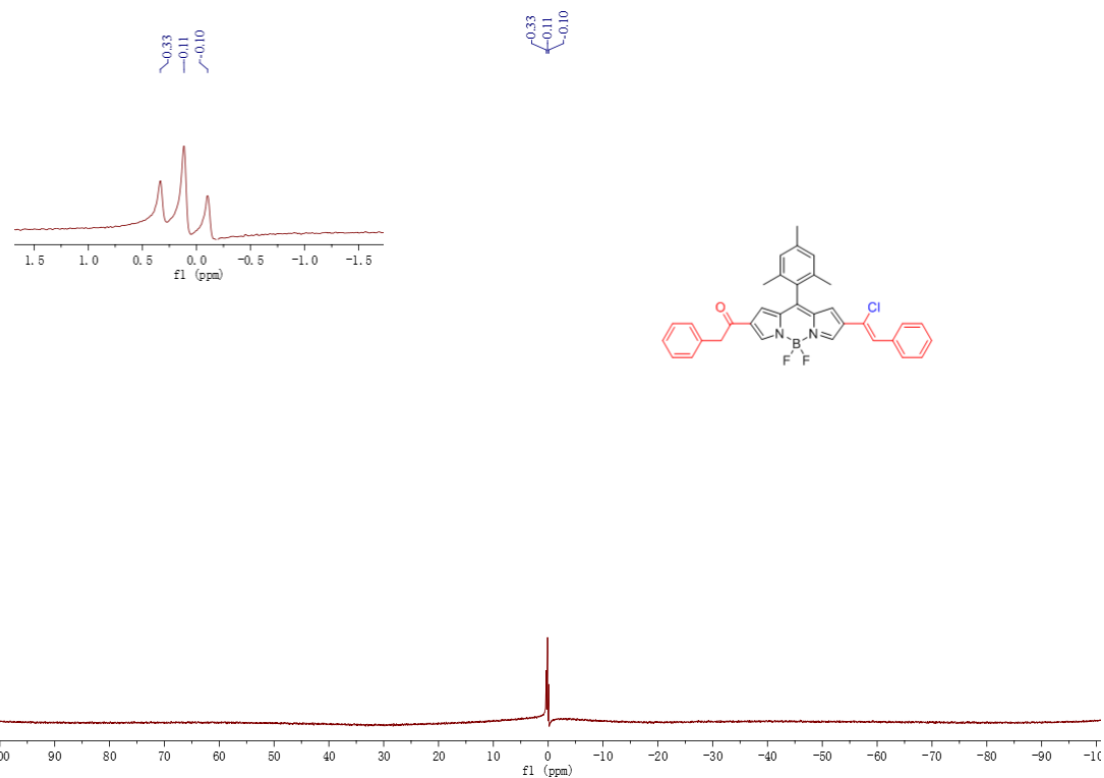

$^{19}\text{F}$  NMR spectrum of **4f** in  $\text{CDCl}_3$

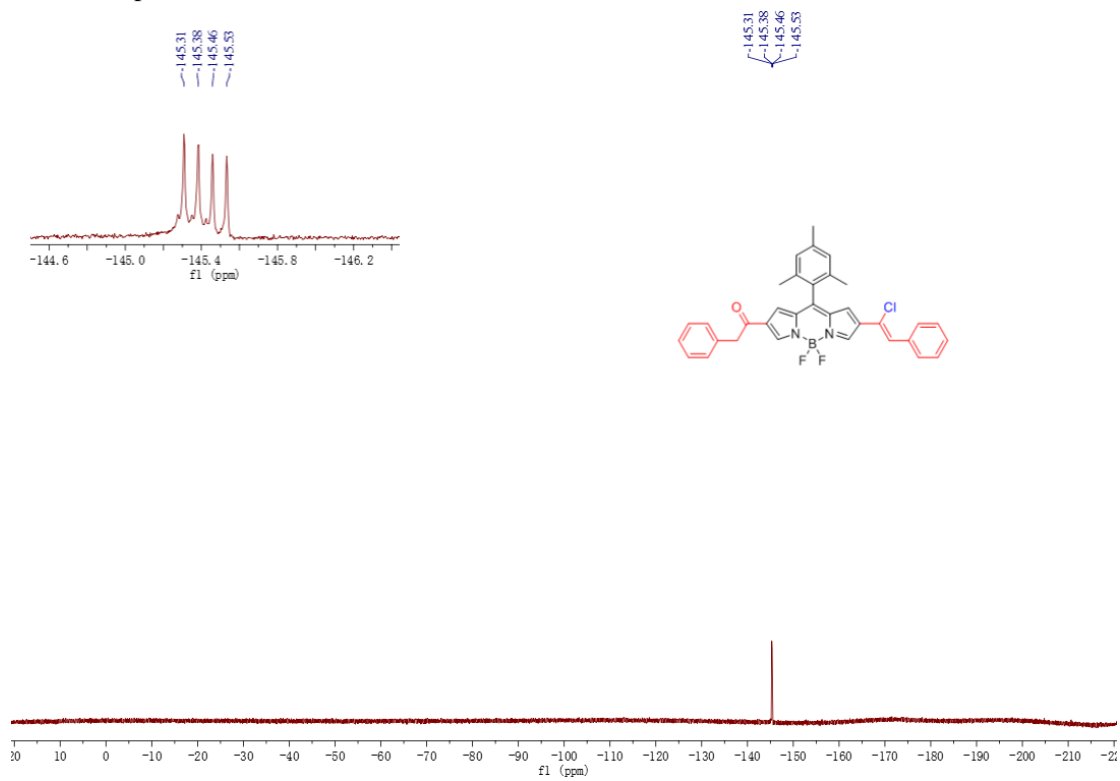

$^1\text{H}$  NMR spectrum of **4g** in  $\text{CDCl}_3$

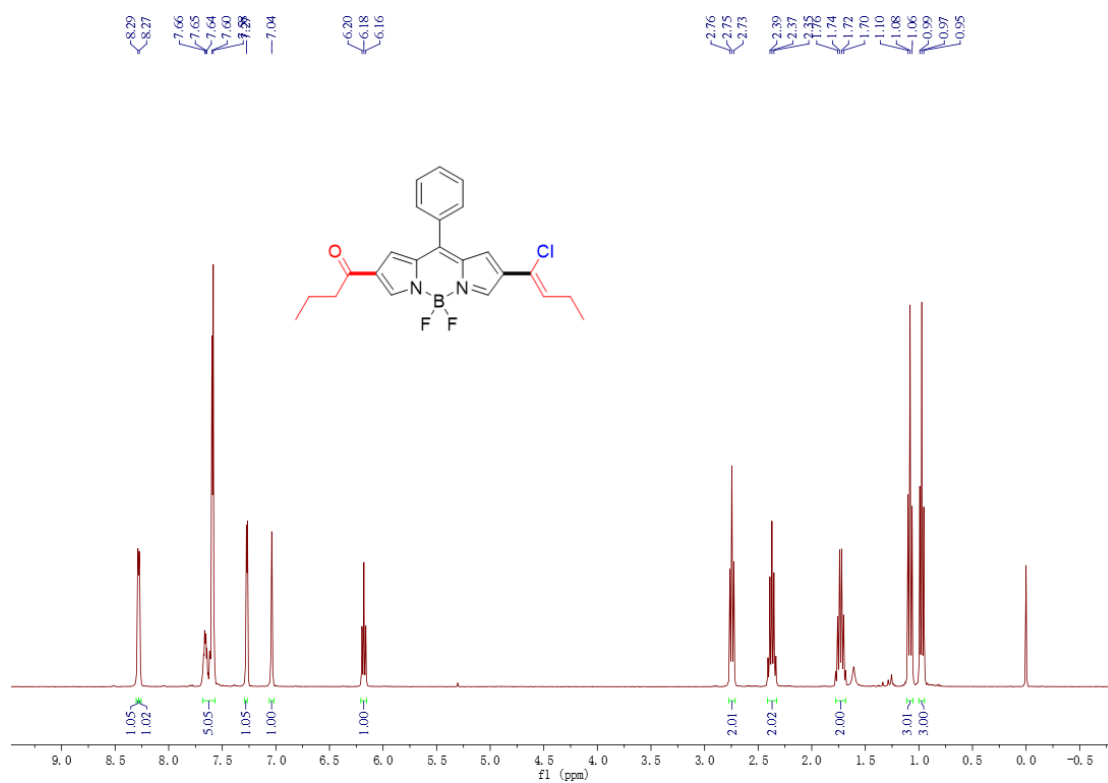

$^{13}\text{C}$  NMR spectrum of **4g** in  $\text{CDCl}_3$

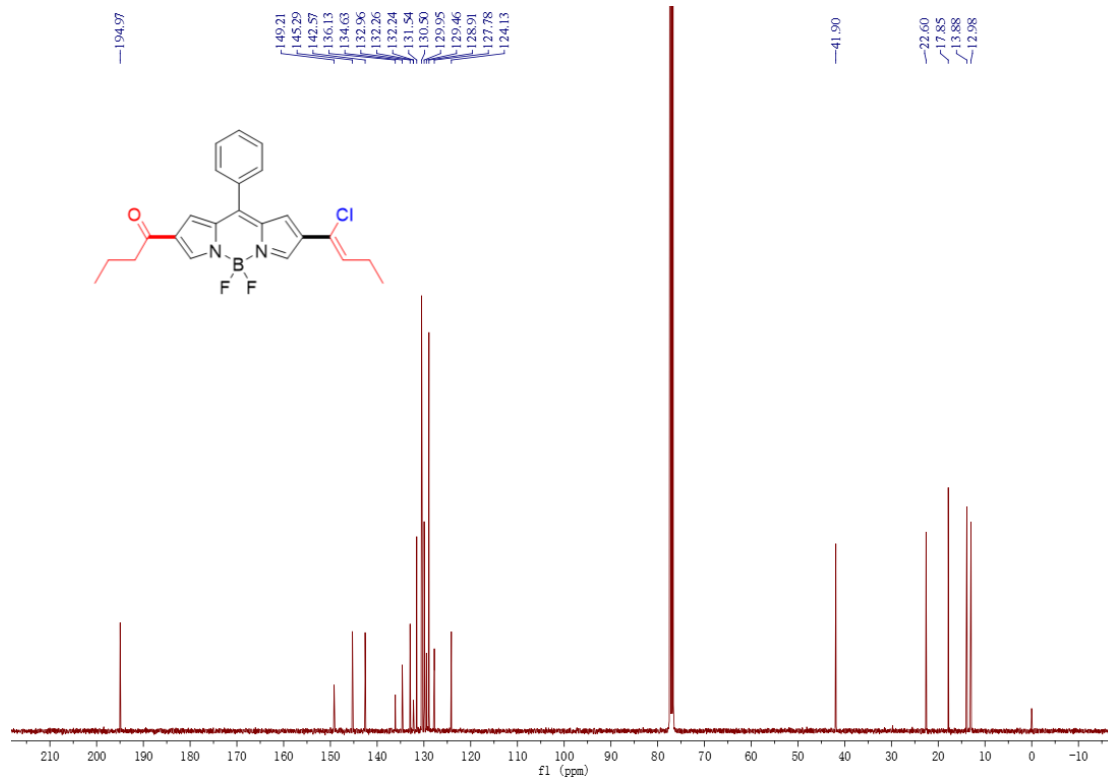

$^{11}\text{B}$  NMR spectrum of **4g** in  $\text{CDCl}_3$

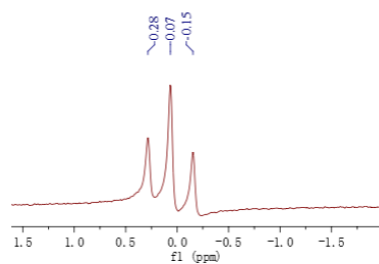

0.28  
0.07  
-0.15

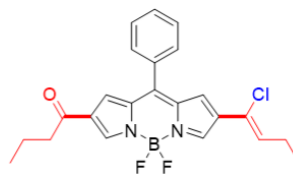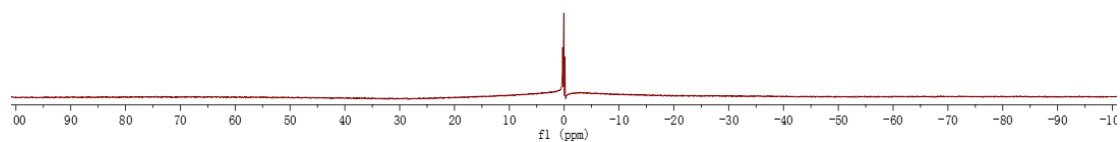

$^{19}\text{F}$  NMR spectrum of **4g** in  $\text{CDCl}_3$

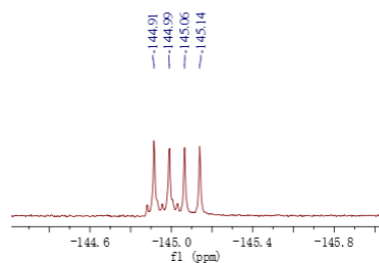

144.91  
144.99  
145.06  
145.14

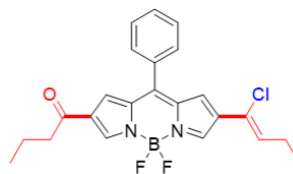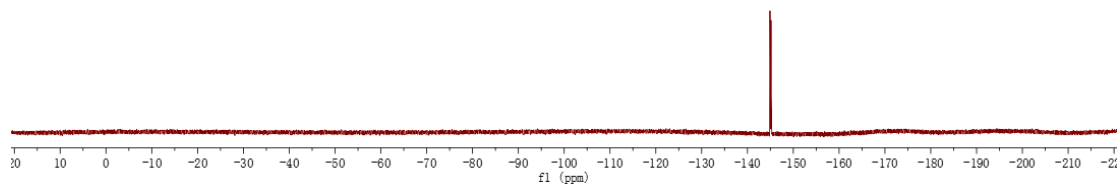

$^1\text{H}$  NMR spectrum of **4h** in  $\text{CDCl}_3$

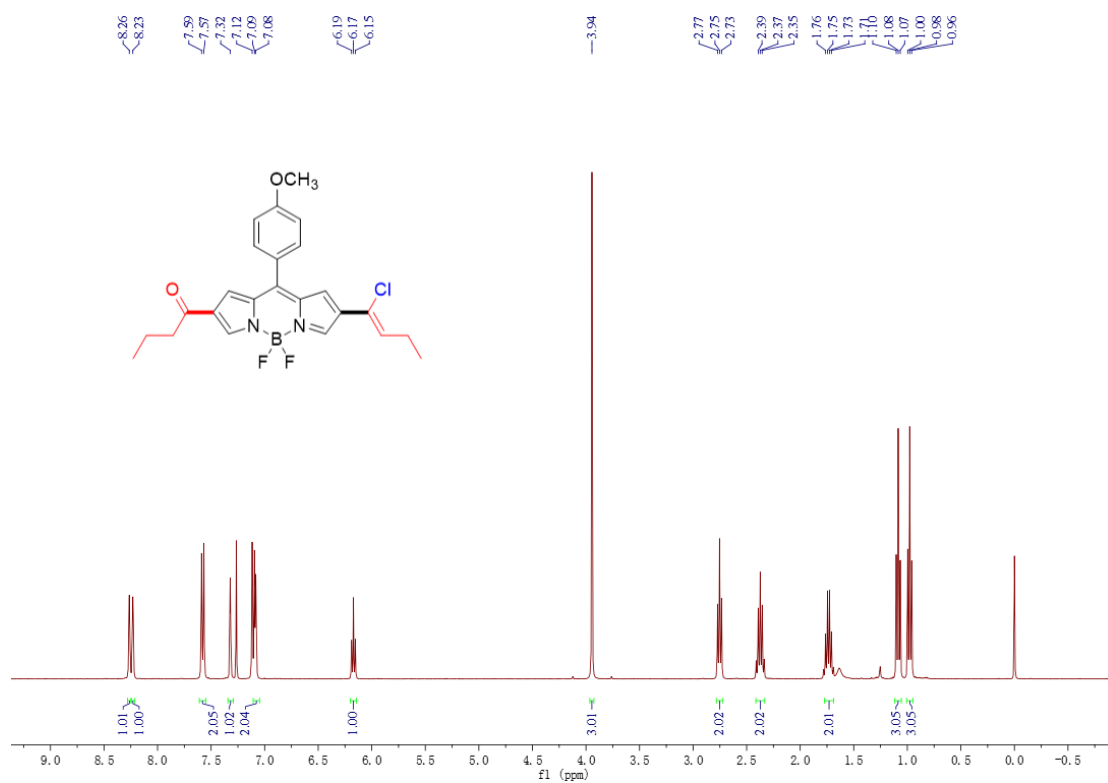

$^{13}\text{C}$  NMR spectrum of **4h** in  $\text{CDCl}_3$

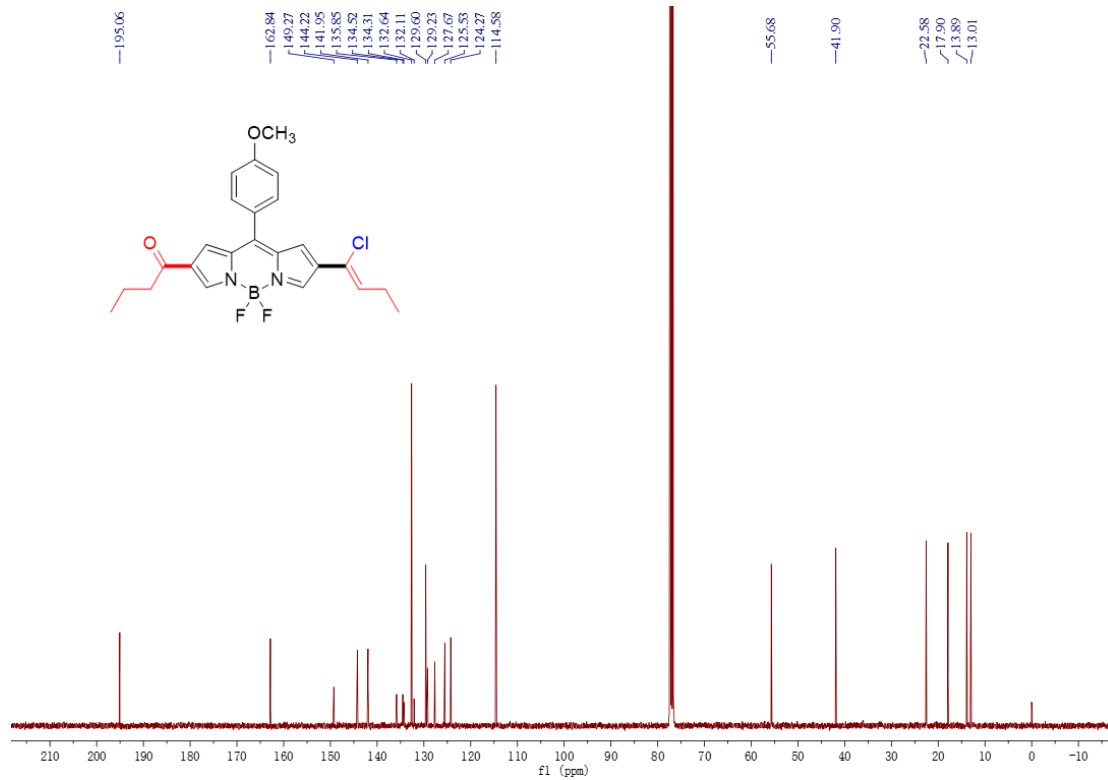

$^{11}\text{B}$  NMR spectrum of **4h** in  $\text{CDCl}_3$

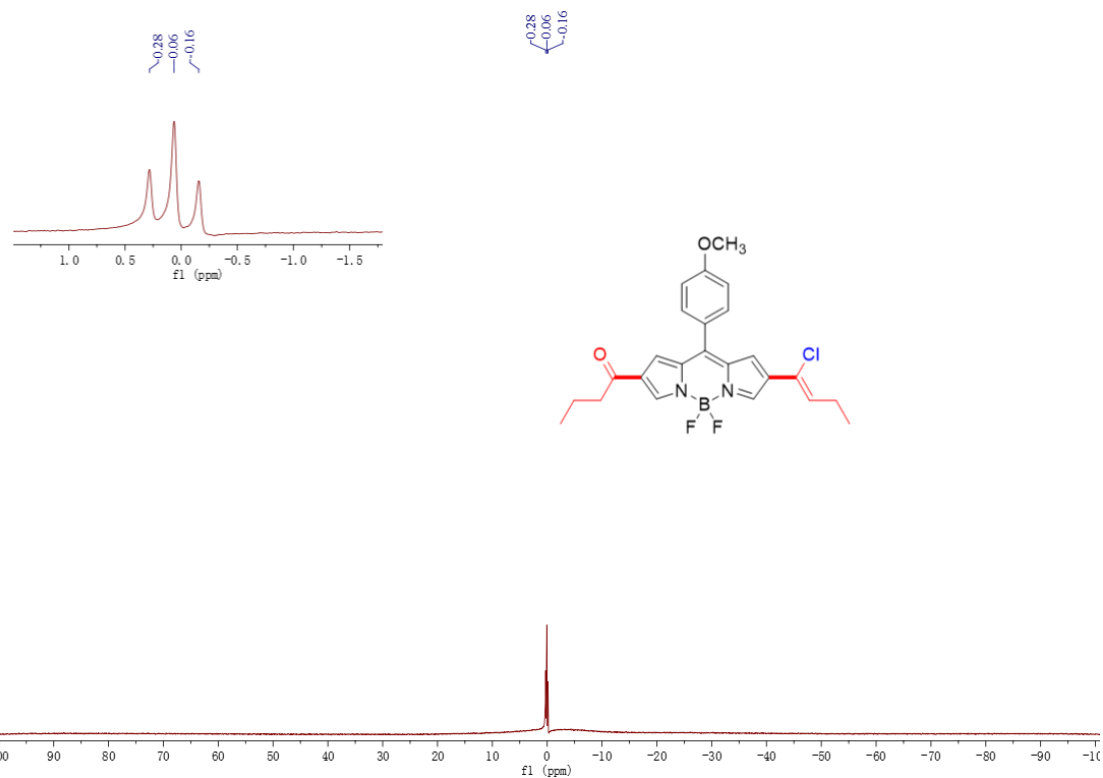

$^{19}\text{F}$  NMR spectrum of **4h** in  $\text{CDCl}_3$

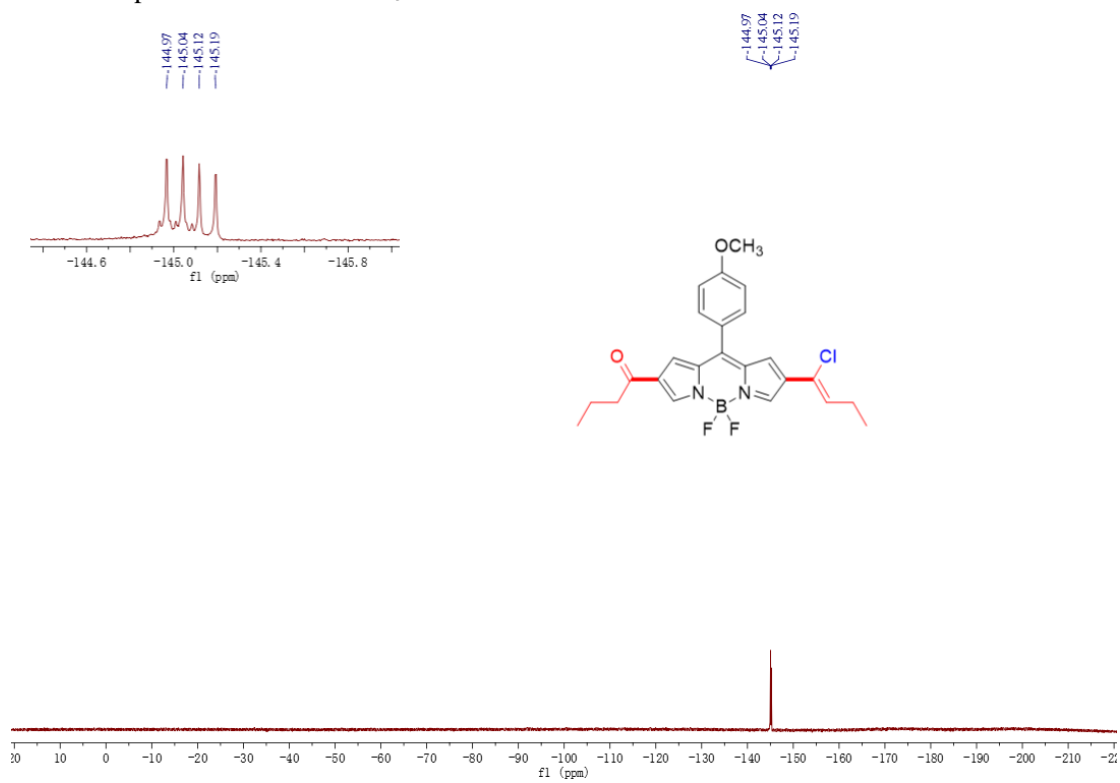

$^1\text{H}$  NMR spectrum of **4i** in  $\text{CDCl}_3$

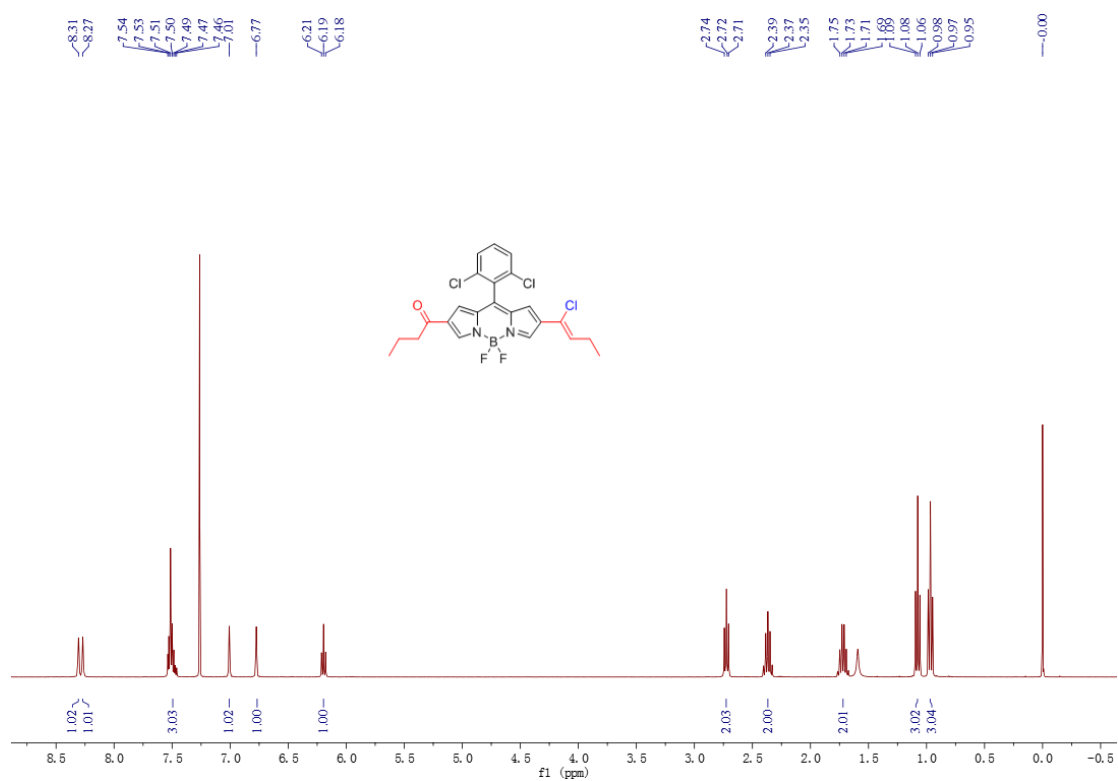

$^{13}\text{C}$  NMR spectrum of **4i** in  $\text{CDCl}_3$

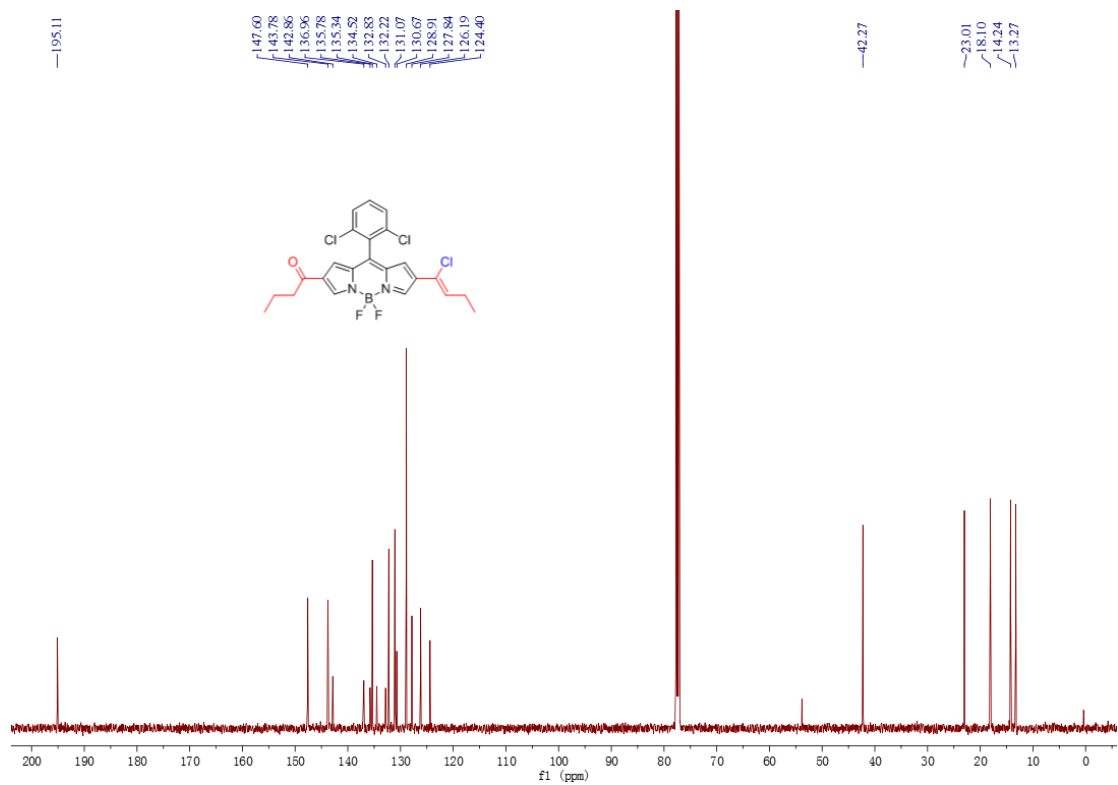

$^{11}\text{B}$  NMR spectrum of **4i** in  $\text{CDCl}_3$

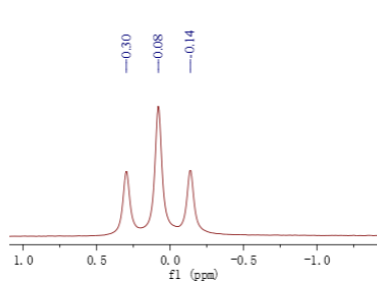

0.30  
0.08  
-0.14

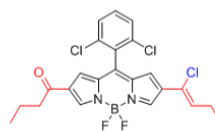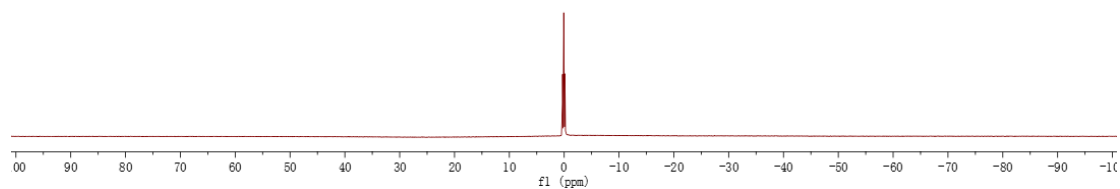

$^{19}\text{F}$  NMR spectrum of **4i** in  $\text{CDCl}_3$

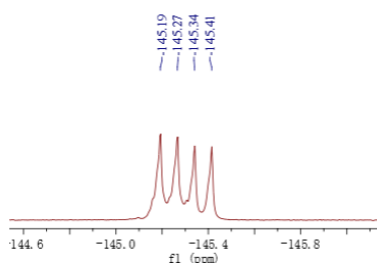

145.19  
145.27  
145.34  
145.41

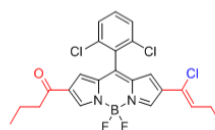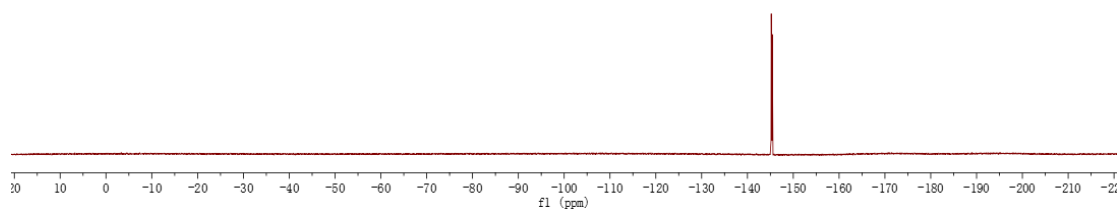

<sup>1</sup>H NMR spectrum of **5** in CDCl<sub>3</sub>

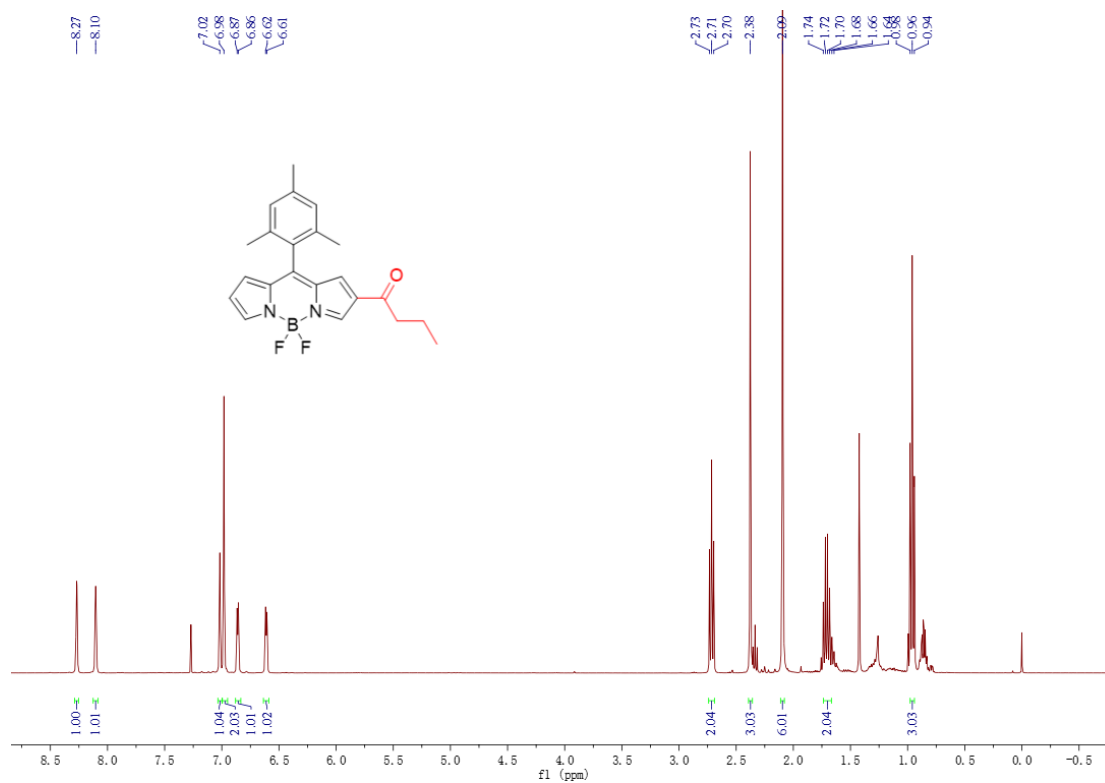

<sup>13</sup>C NMR spectrum of **5** in CDCl<sub>3</sub>

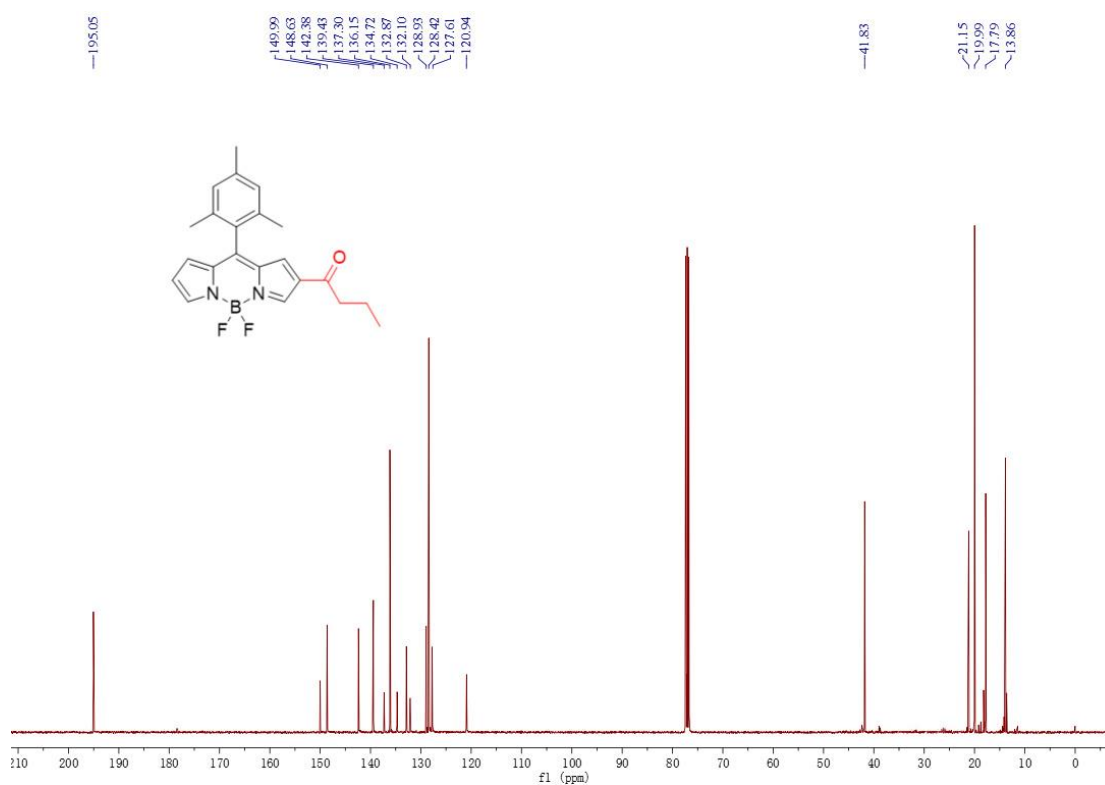



$^{11}\text{B}$  NMR spectrum of **5** in  $\text{CDCl}_3$

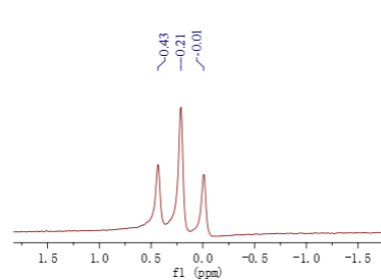

0.43  
0.21  
0.01

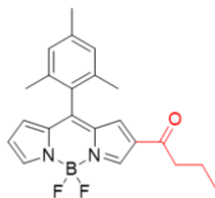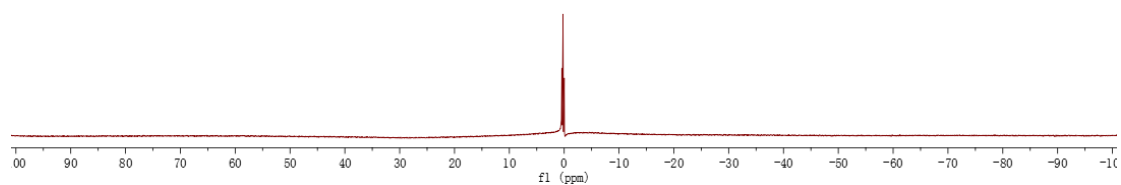

$^{19}\text{F}$  NMR spectrum of **5** in  $\text{CDCl}_3$

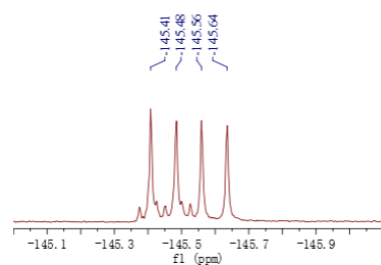

145.41  
145.48  
145.56  
145.64

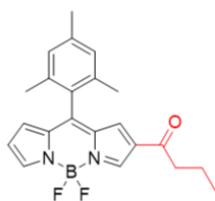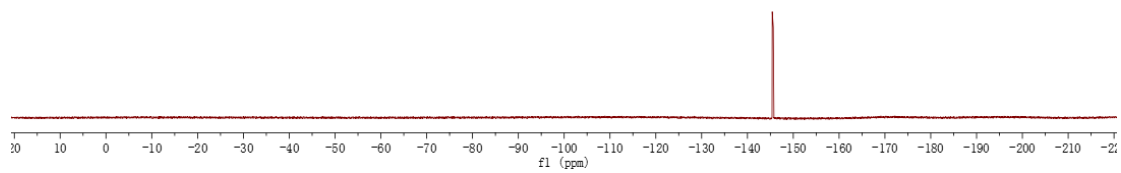

$^1\text{H}$  NMR spectrum of **6** in  $\text{CDCl}_3$

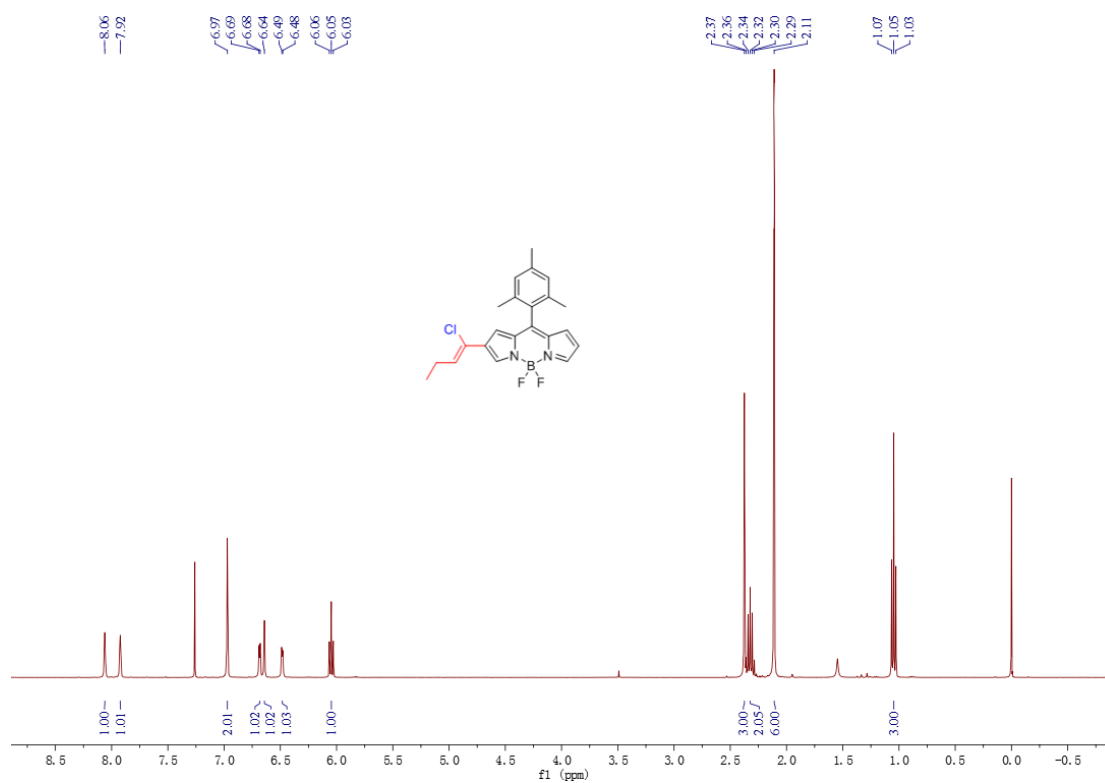

$^{13}\text{C}$  NMR spectrum of **6** in  $\text{CDCl}_3$

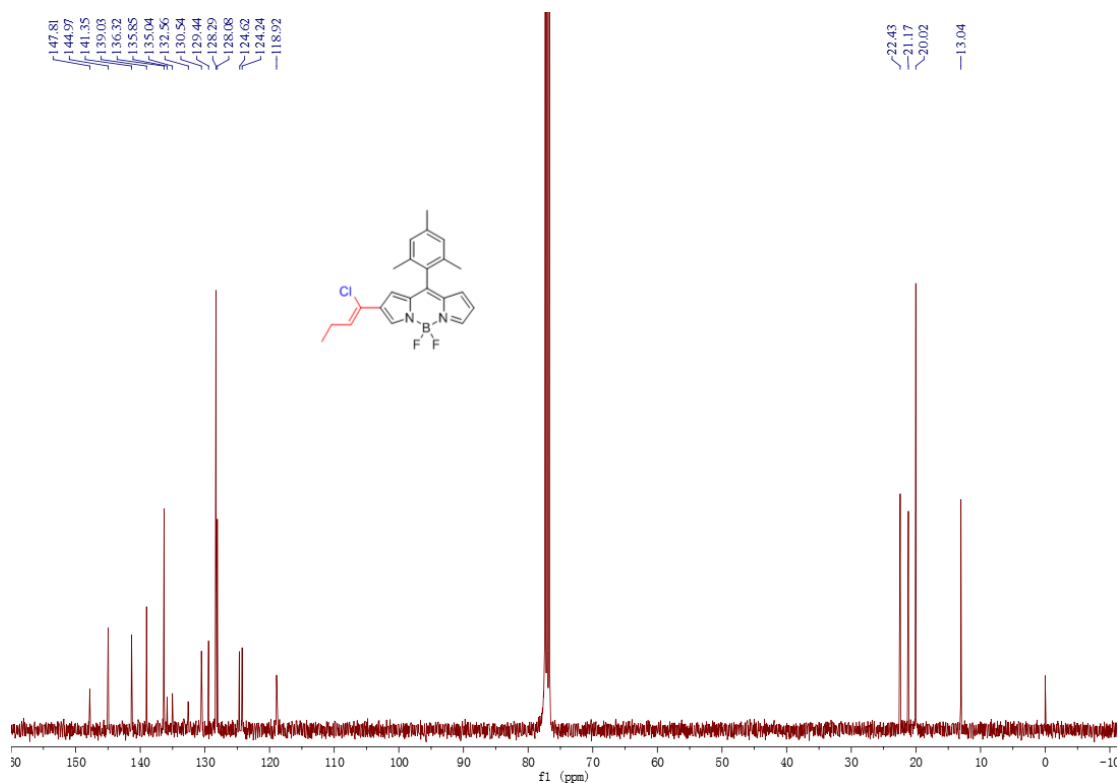

$^{11}\text{B}$  NMR spectrum of **6** in  $\text{CDCl}_3$

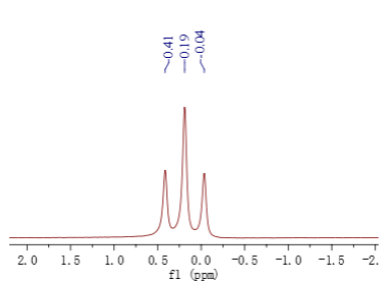

0.41  
0.19  
0.04

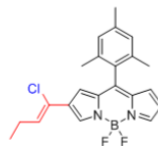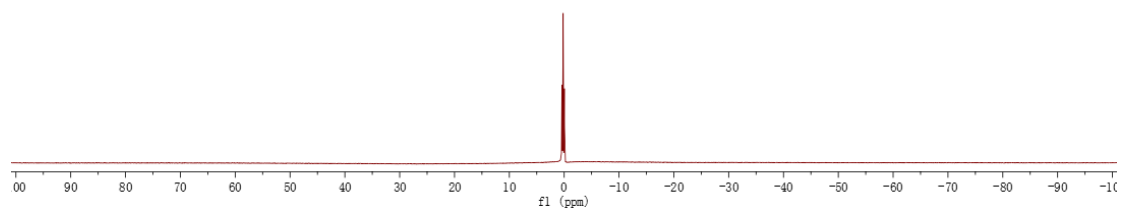

$^{19}\text{F}$  NMR spectrum of **6** in  $\text{CDCl}_3$

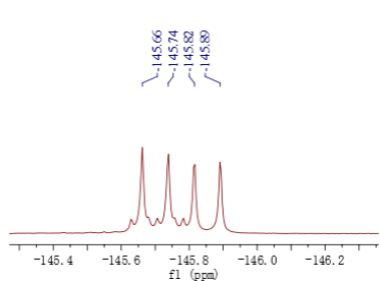

-145.66  
-145.74  
-145.82  
-145.89

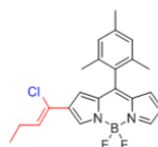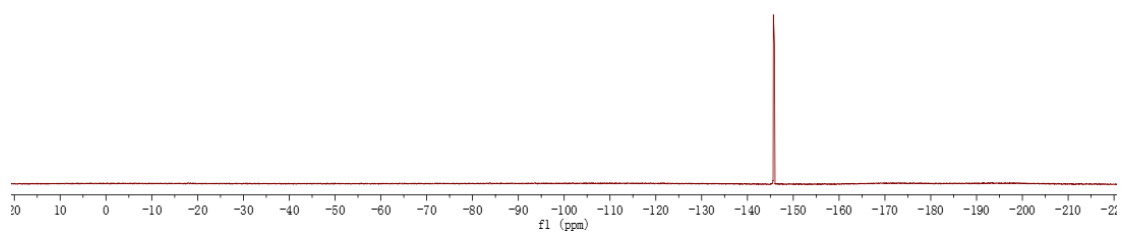

<sup>1</sup>H NMR spectrum of **7** in CDCl<sub>3</sub>

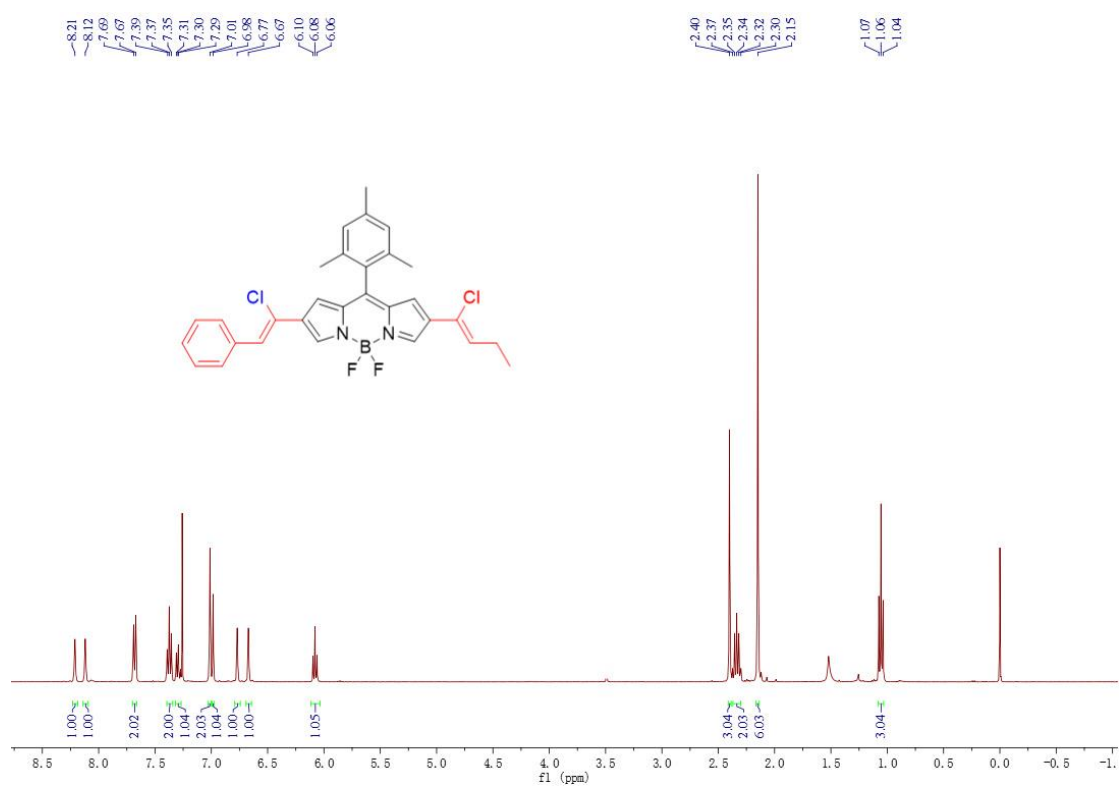

<sup>13</sup>C NMR spectrum of **7** in CDCl<sub>3</sub>

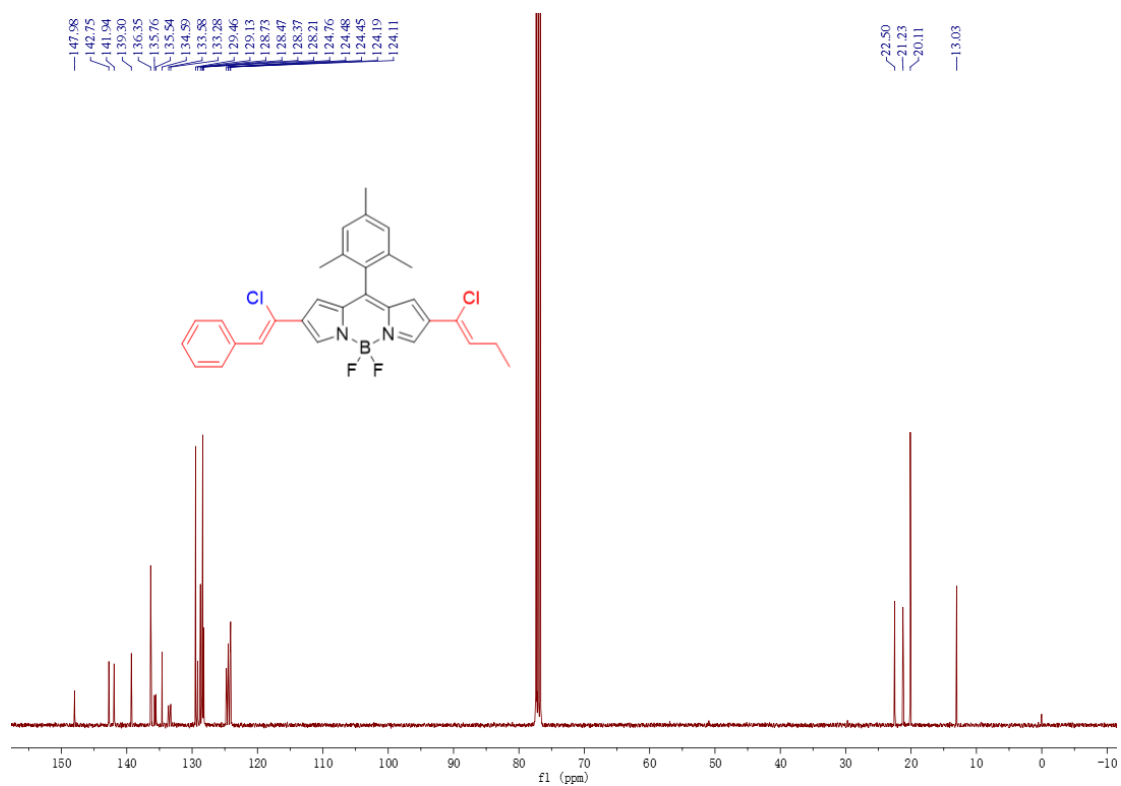

$^{11}\text{B}$  NMR spectrum of **7** in  $\text{CDCl}_3$

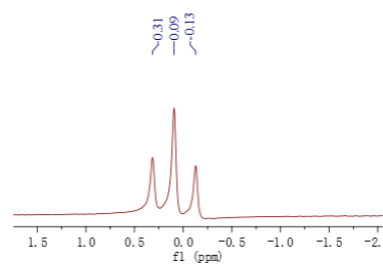

0.31  
0.09  
-0.13

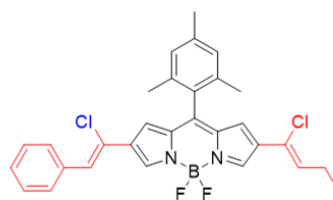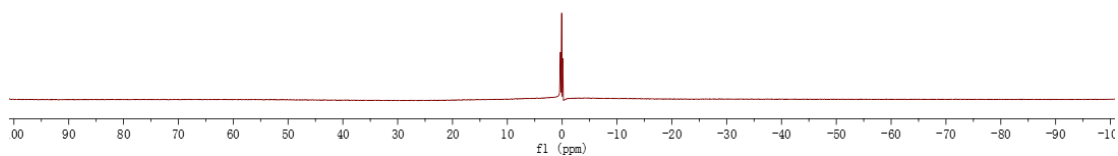

$^{19}\text{F}$  NMR spectrum of **7** in  $\text{CDCl}_3$

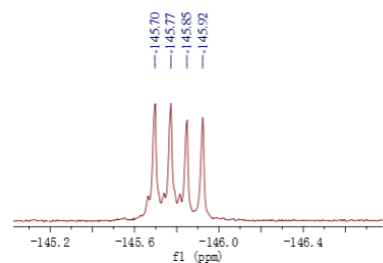

-145.70  
-145.77  
-145.85  
-145.92

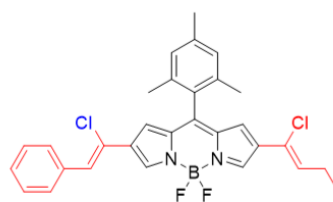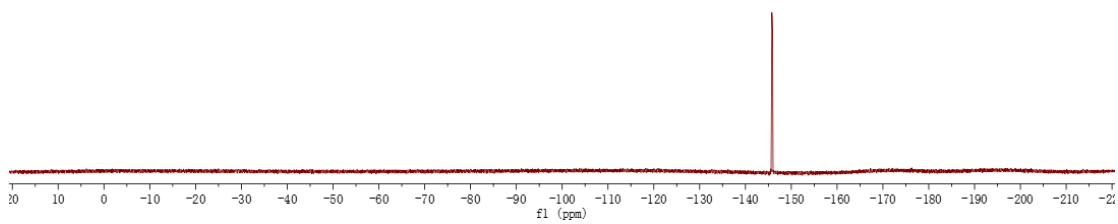

$^1\text{H}$  NMR spectrum of **3e-p** in  $\text{CDCl}_3$

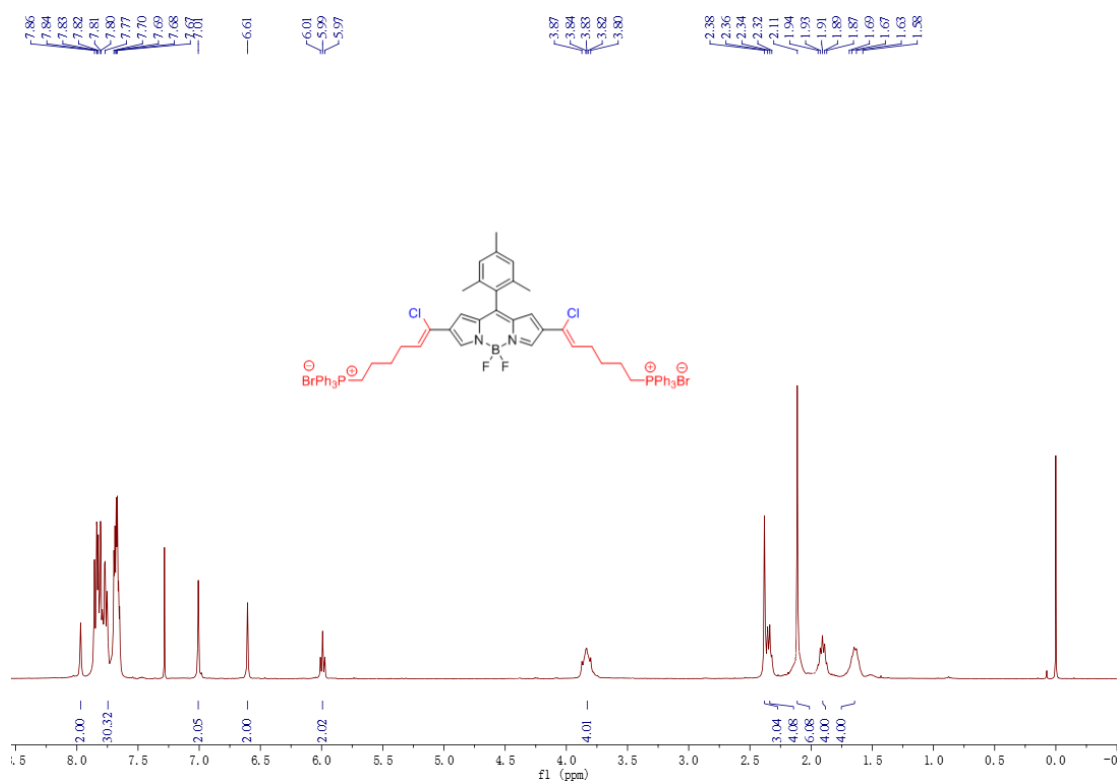

$^{13}\text{C}$  NMR spectrum of **3e-p** in  $\text{CDCl}_3$

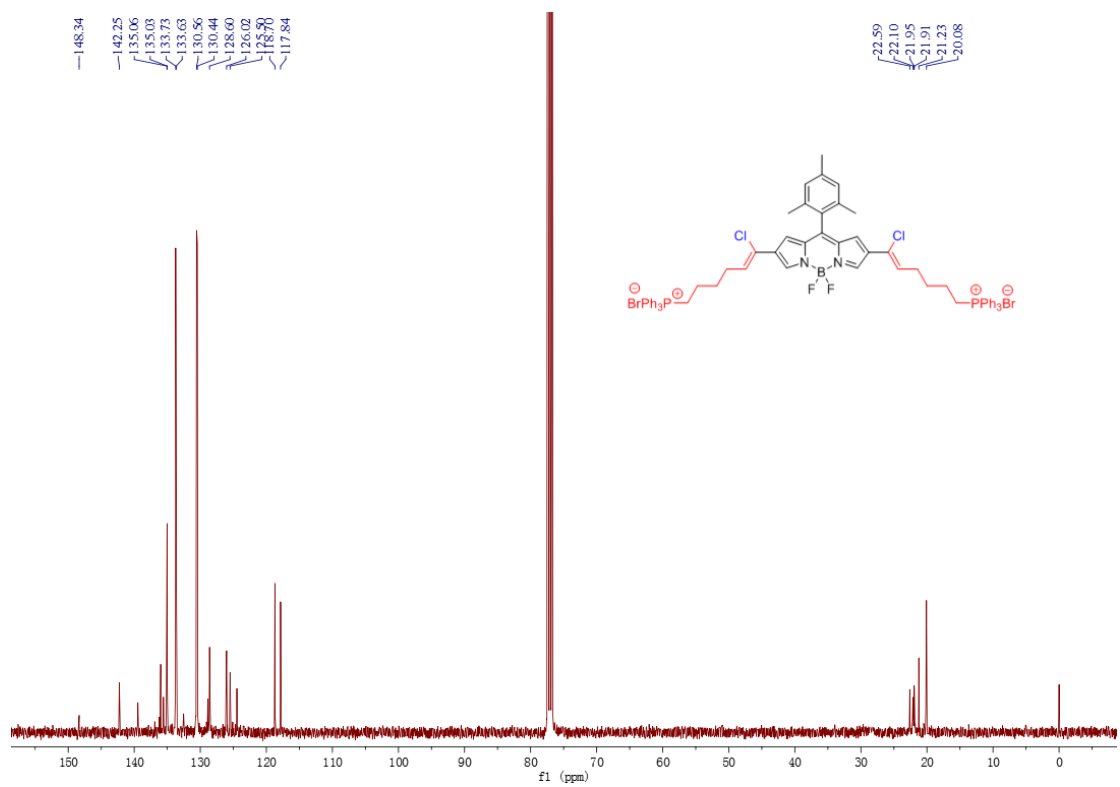

$^{11}\text{B}$  NMR spectrum of **3e-p** in  $\text{CDCl}_3$

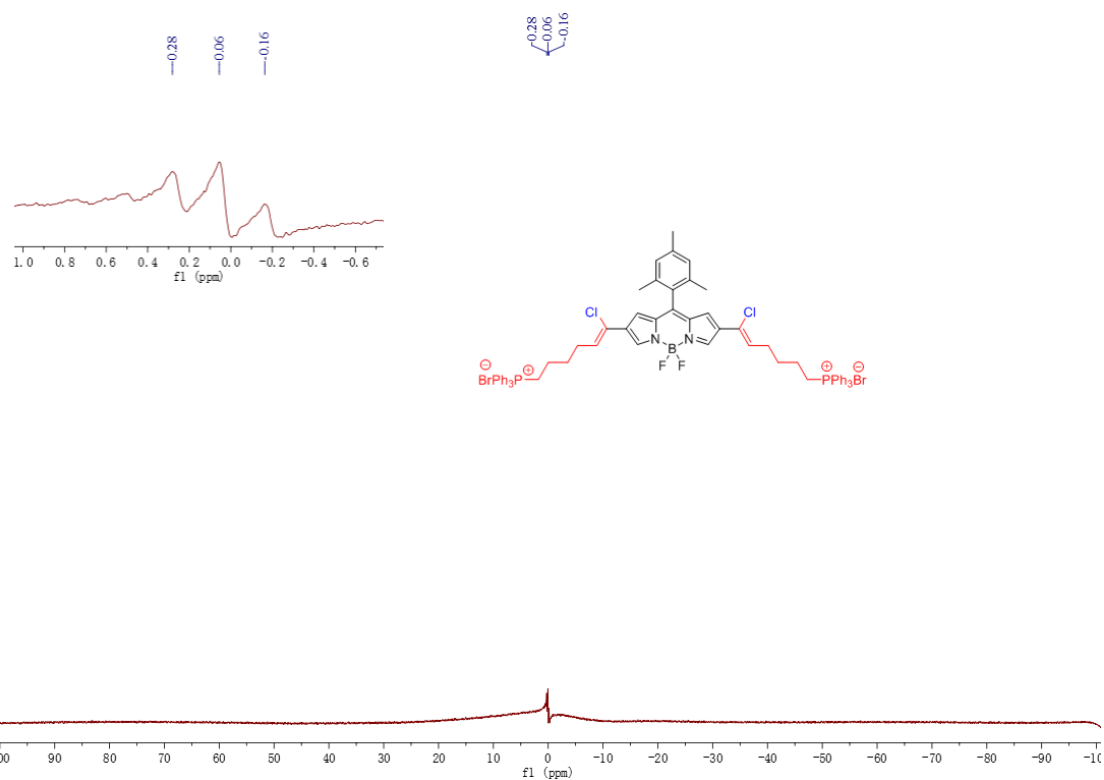

$^{19}\text{F}$  NMR spectrum of **3e-p** in  $\text{CDCl}_3$

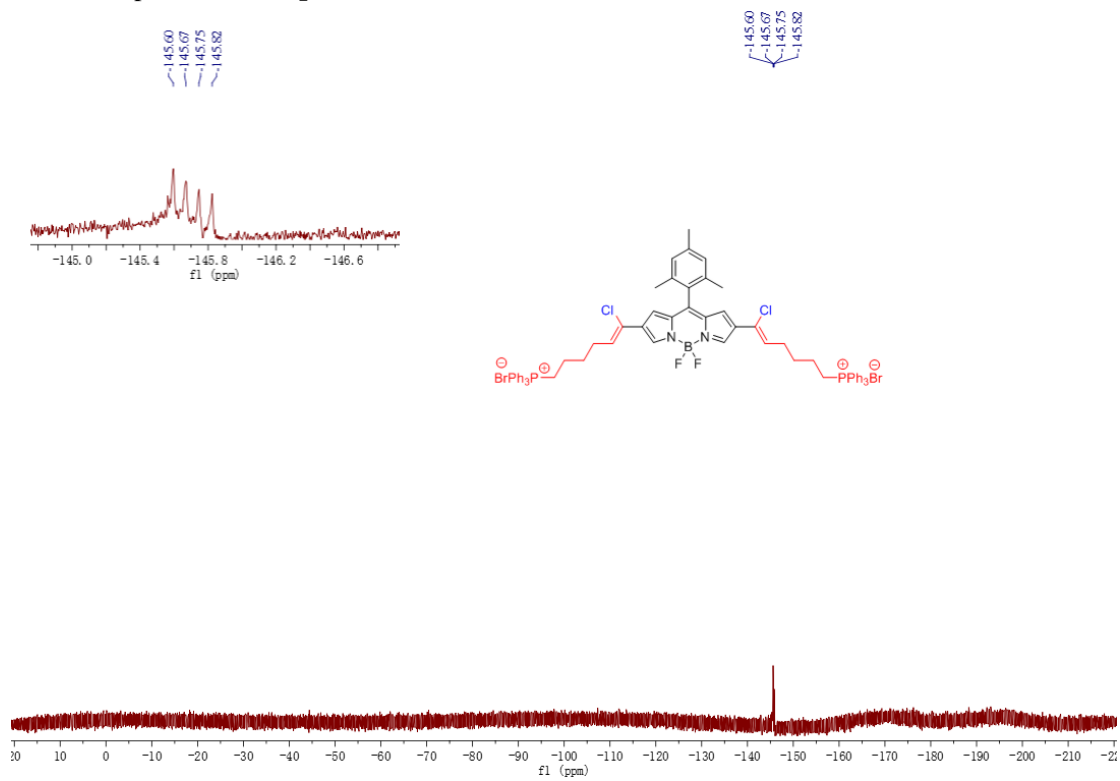

## HRMS spectra of **3a**

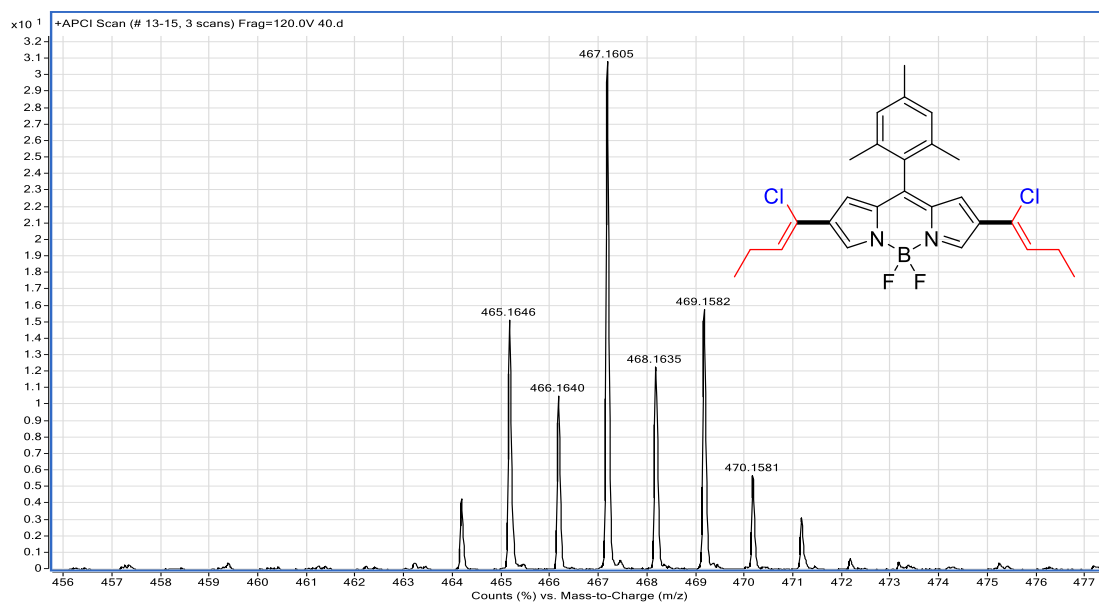

## HRMS spectra of **3b**

278 #8 RT: 0.13 AV: 1 NL: 3.98E4  
T: FTMS + p ESI Full ms [150.00-2000.00]

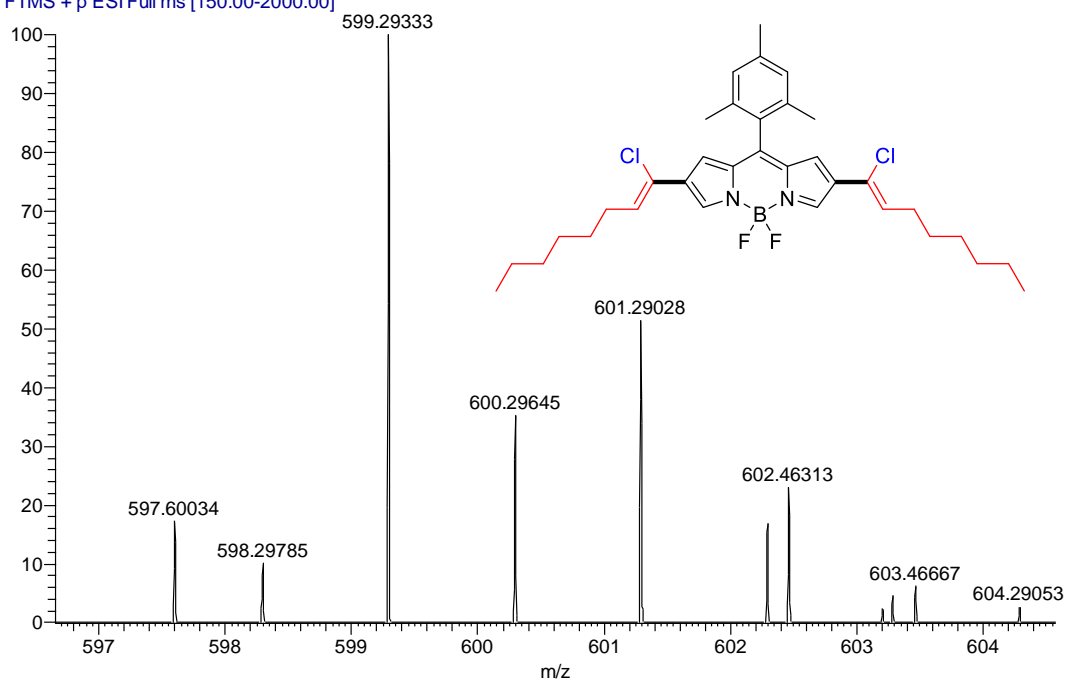



### HRMS spectra of 3c

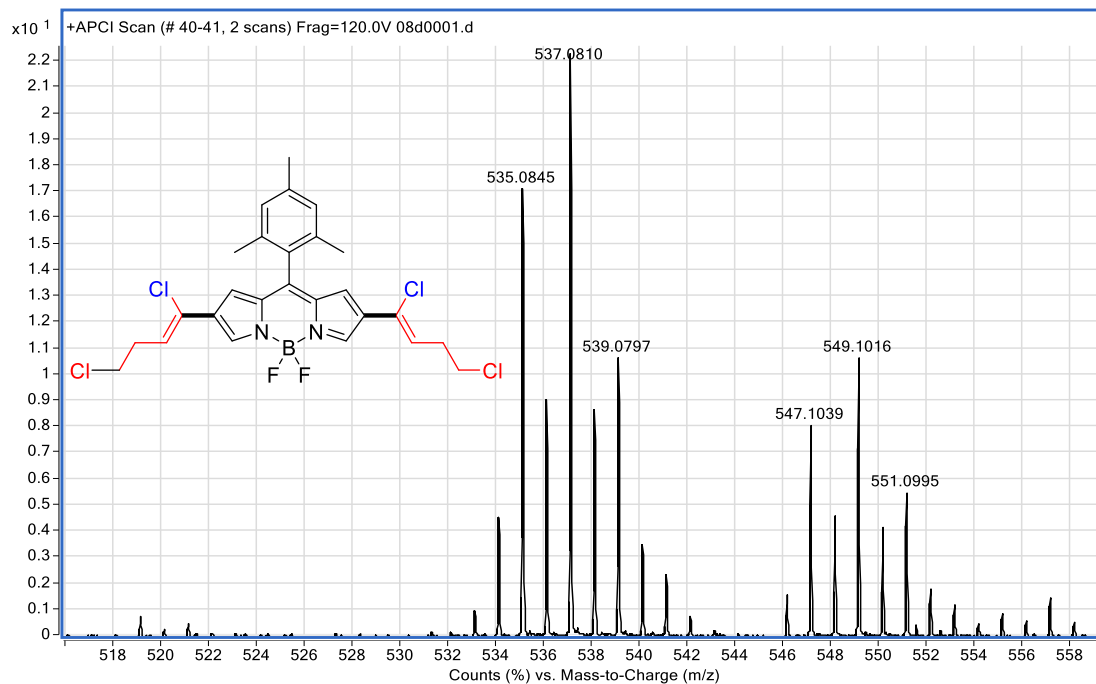

### HRMS spectra of 3d

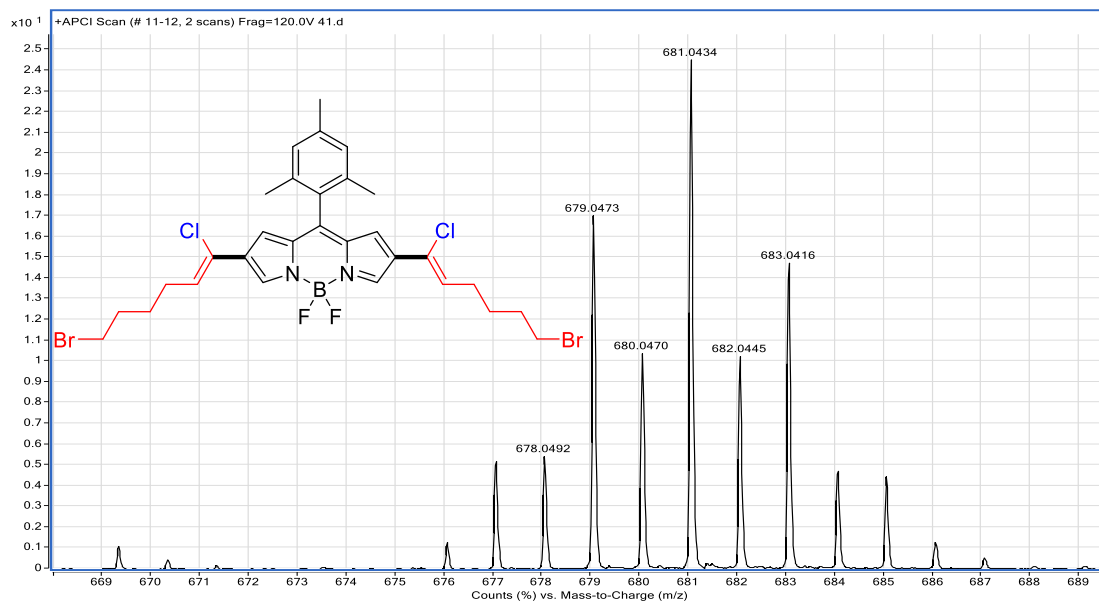

### HRMS spectra of 3e

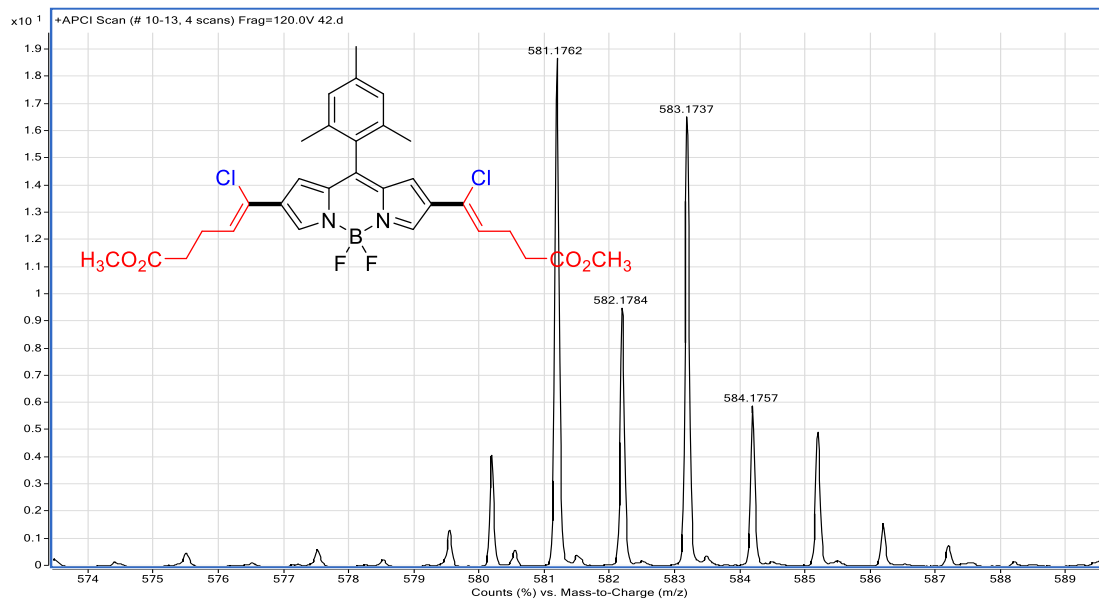

### HRMS spectra of 3f

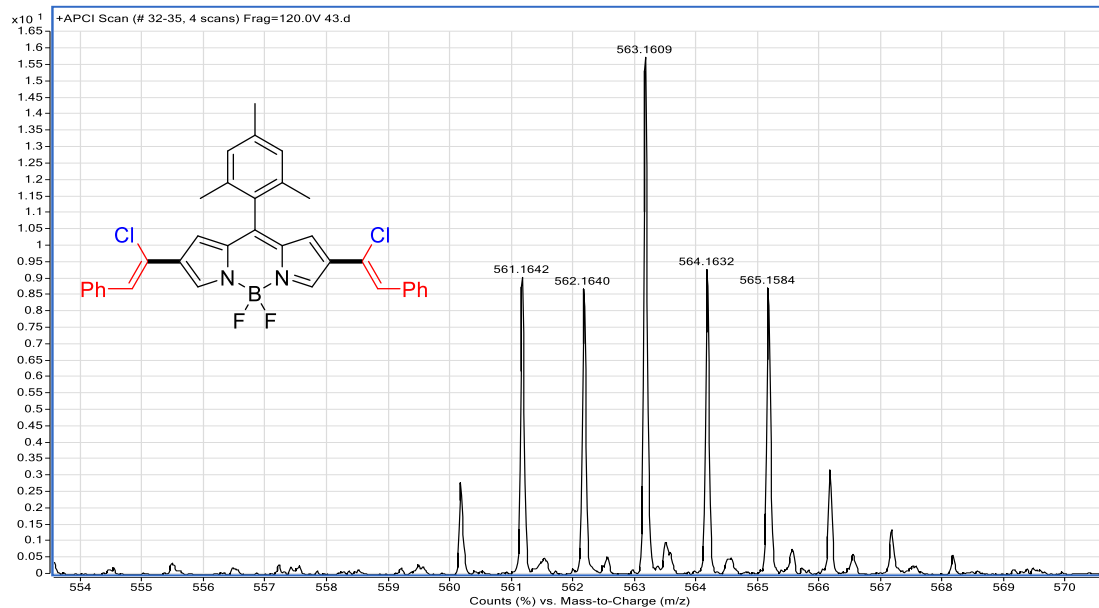

### HRMS spectra of **3g**

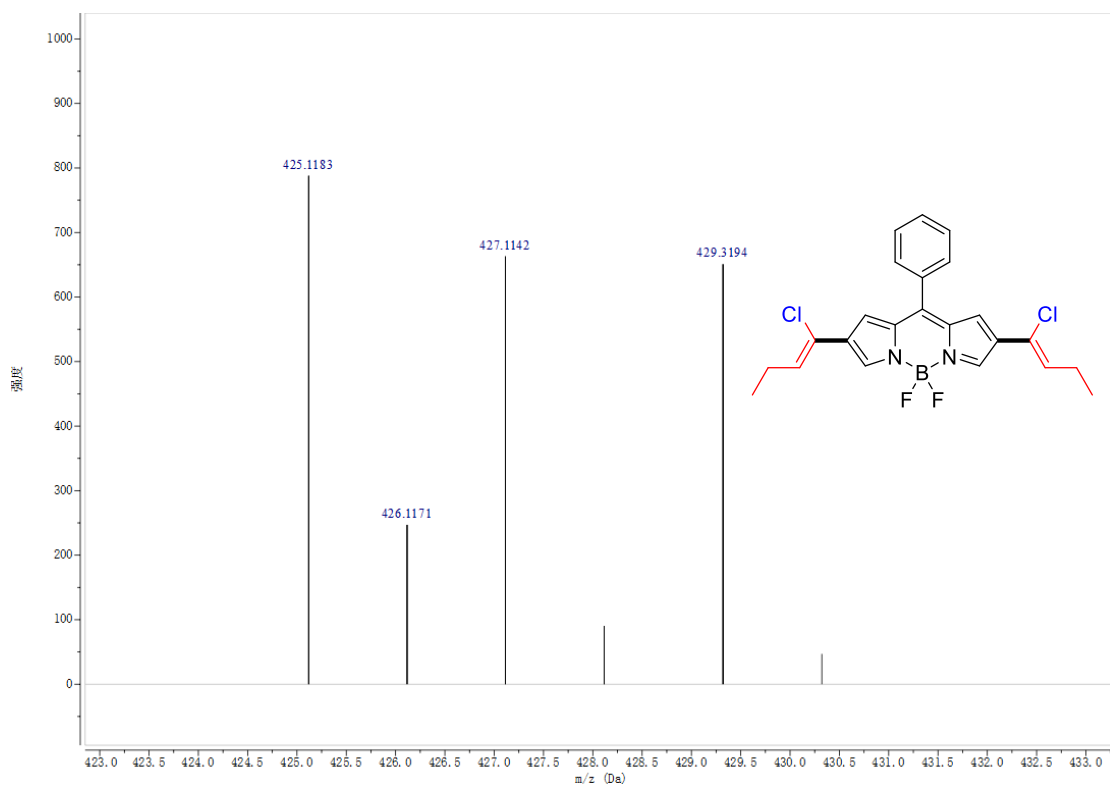

### HRMS spectra of **3h**

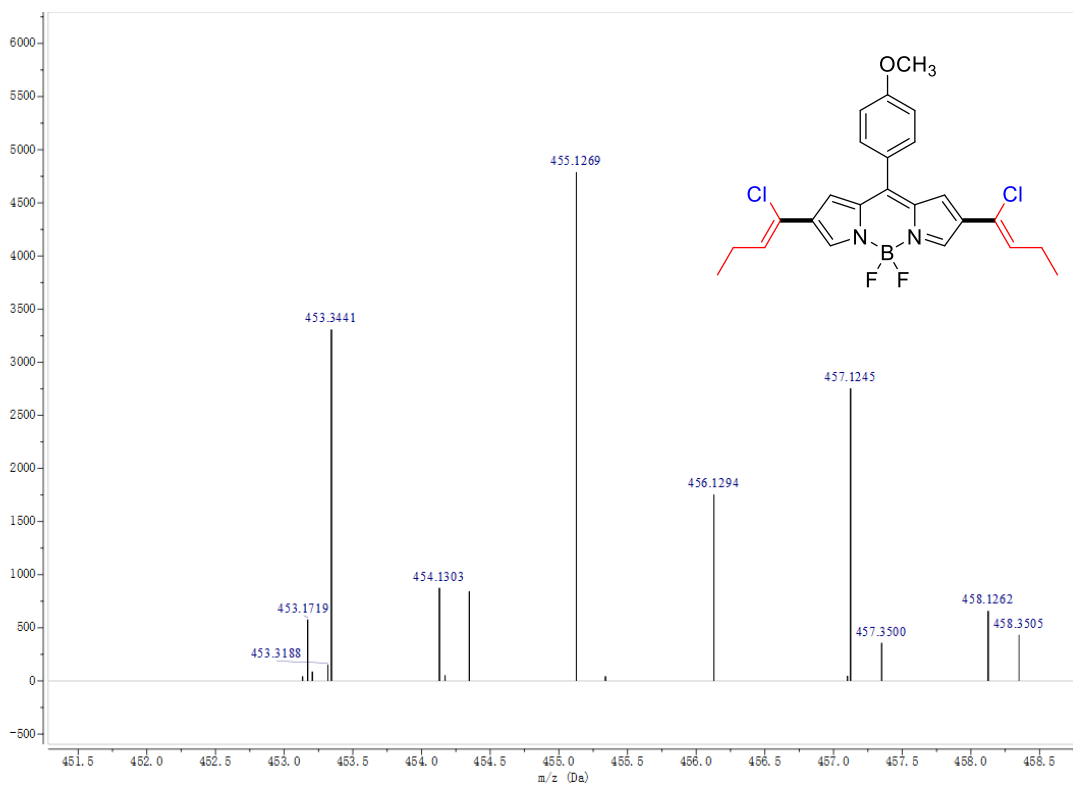

## HRMS spectra of **3i**

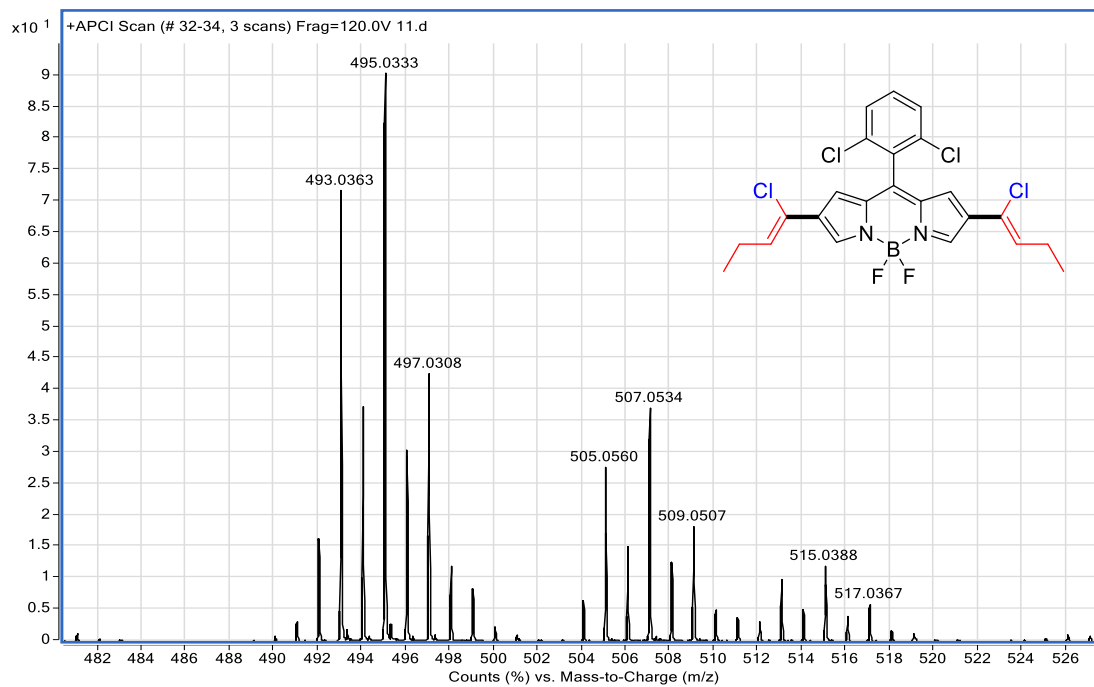

## HRMS spectra of **4a**

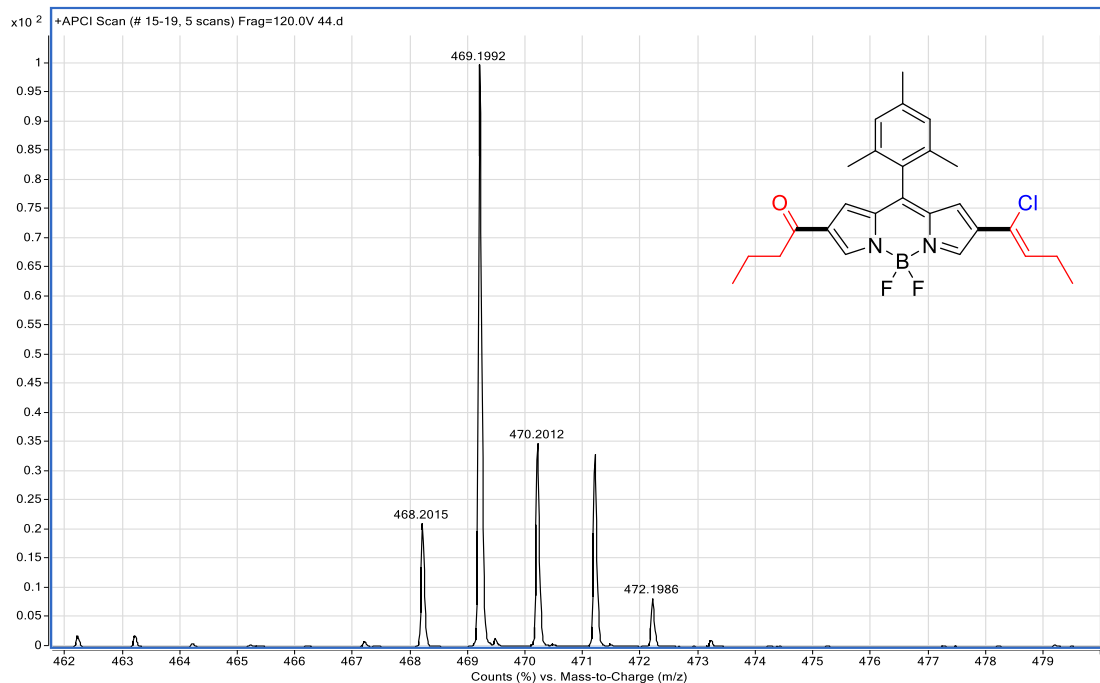

## HRMS spectra of **4b**

277 #35 RT: 0.61 AV: 1 NL: 9.76E4  
T: FTMS + p ESI Full ms [150.00-2000.00]

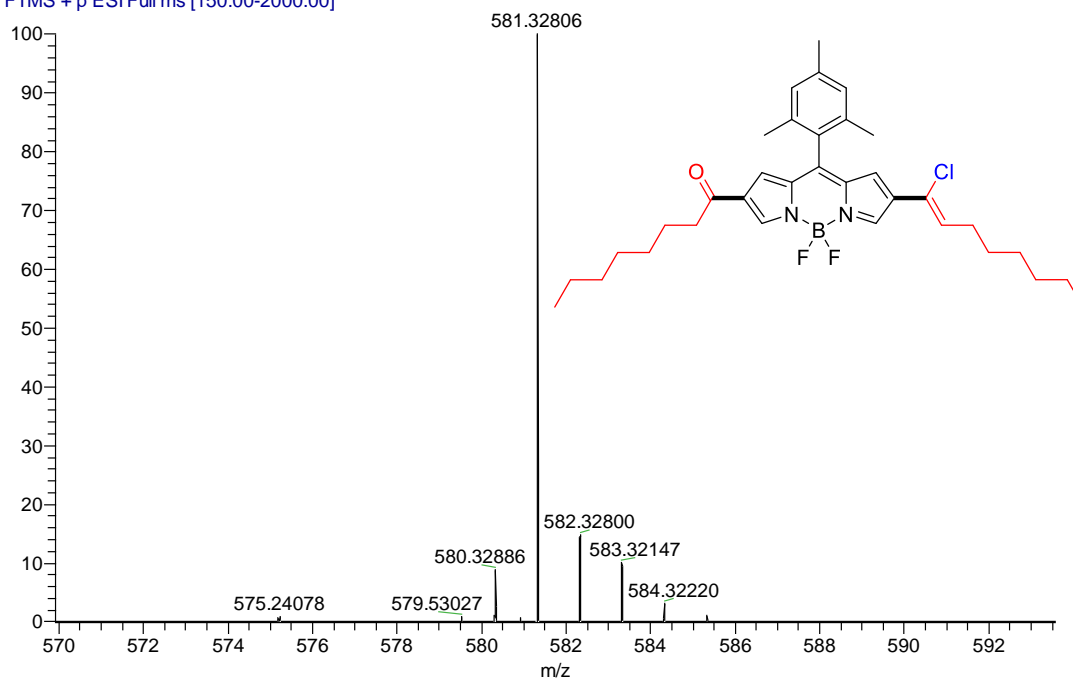

## HRMS spectra of **4c**

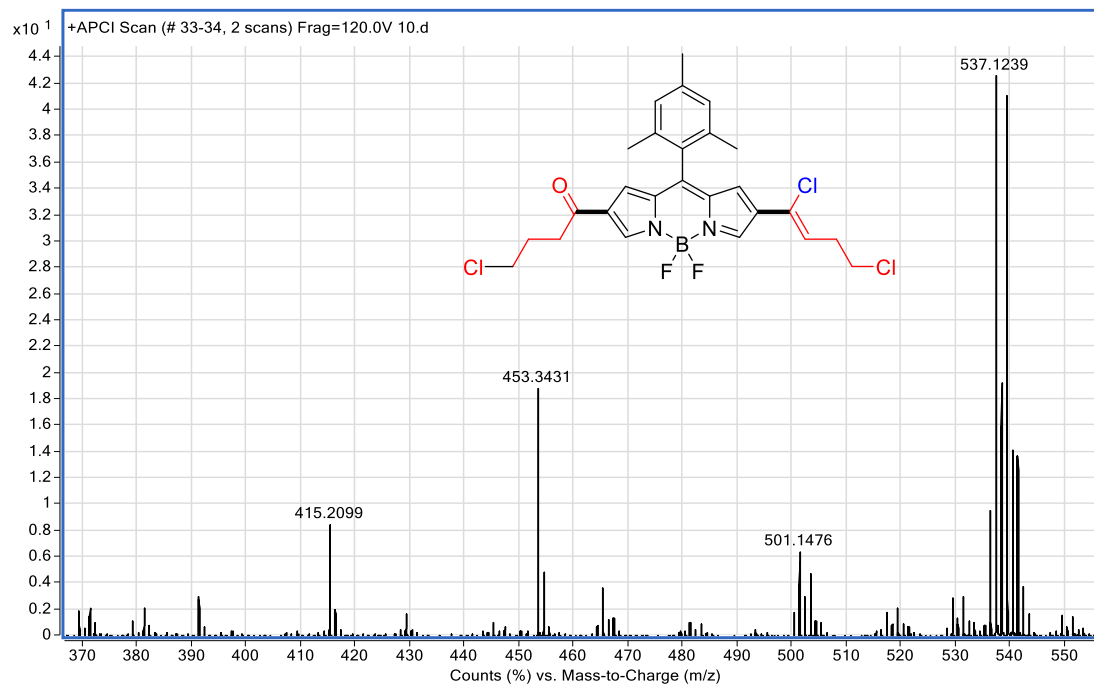

### HRMS spectra of 4d

279 #15 RT: 0.26 AV: 1 NL: 1.05E6  
T: FTMS + p ESI Full ms [150.00-2000.00]

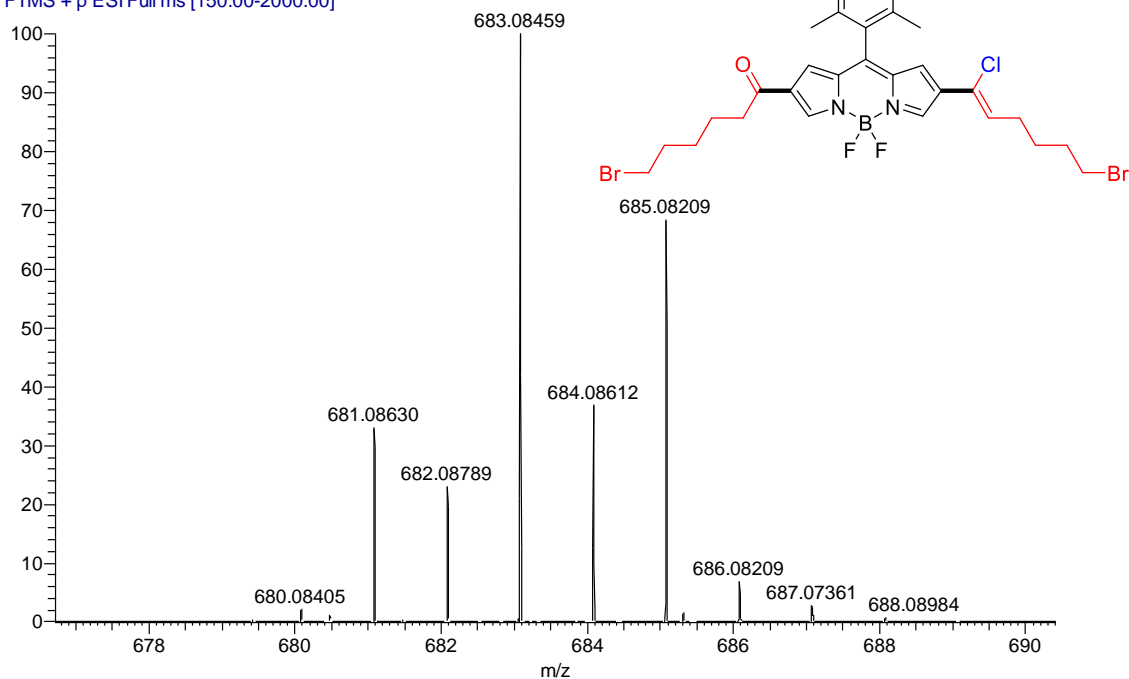

### HRMS spectra of 4e

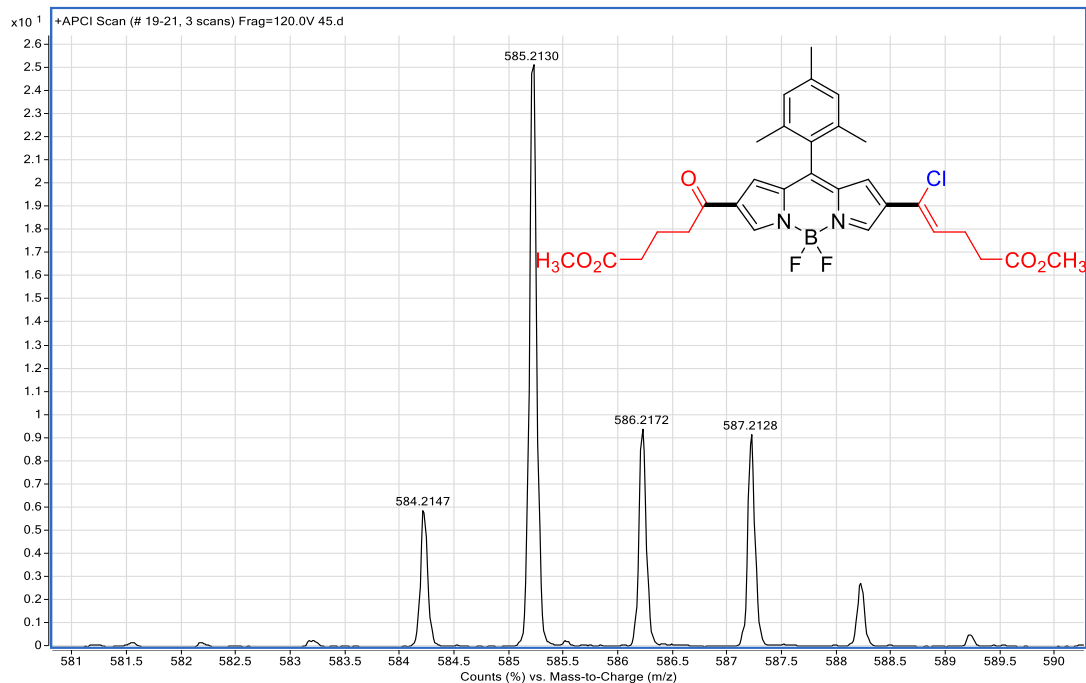

## HRMS spectra of **4f**

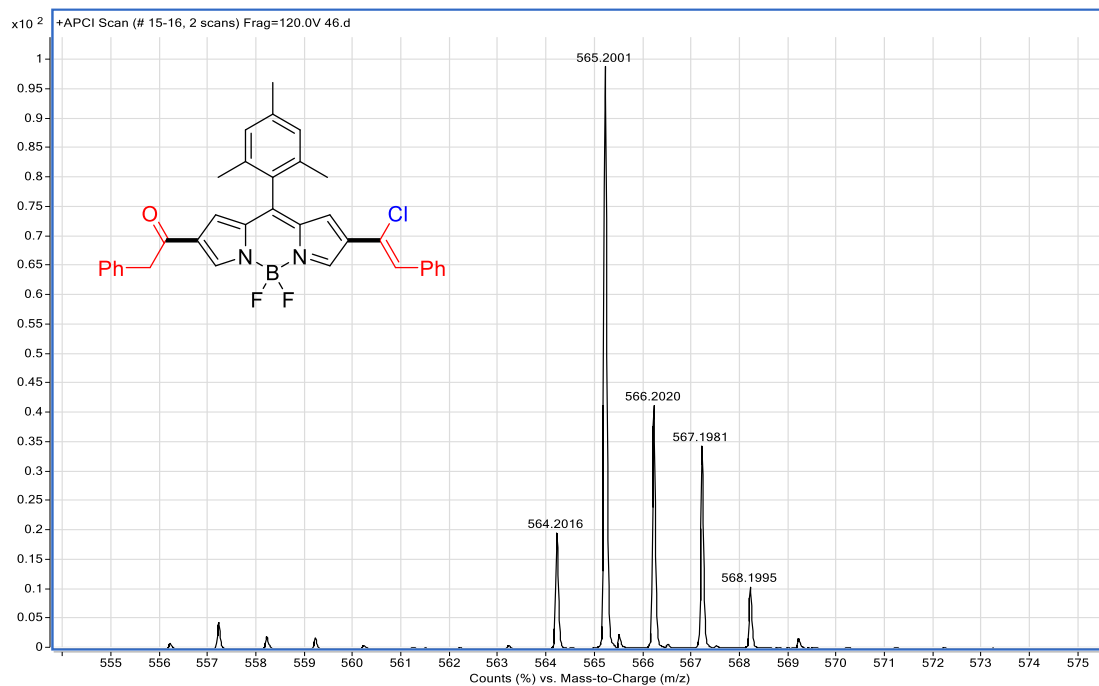

## HRMS spectra of **4g**

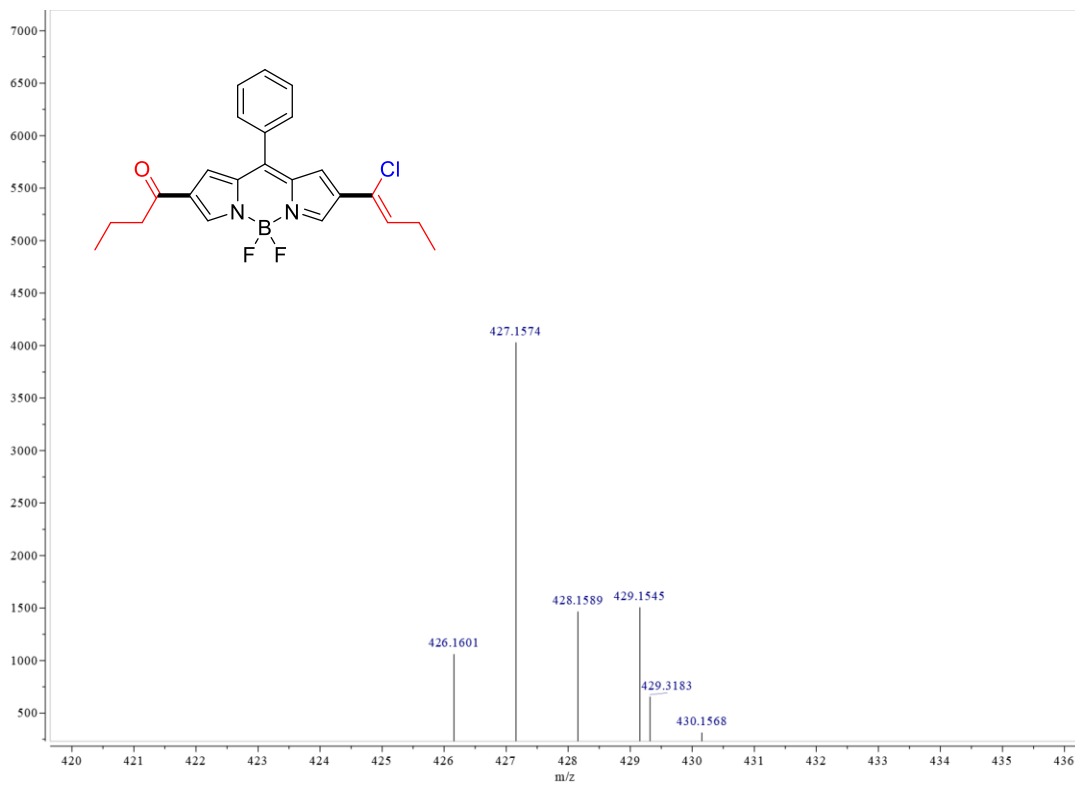

### HRMS spectra of 4h

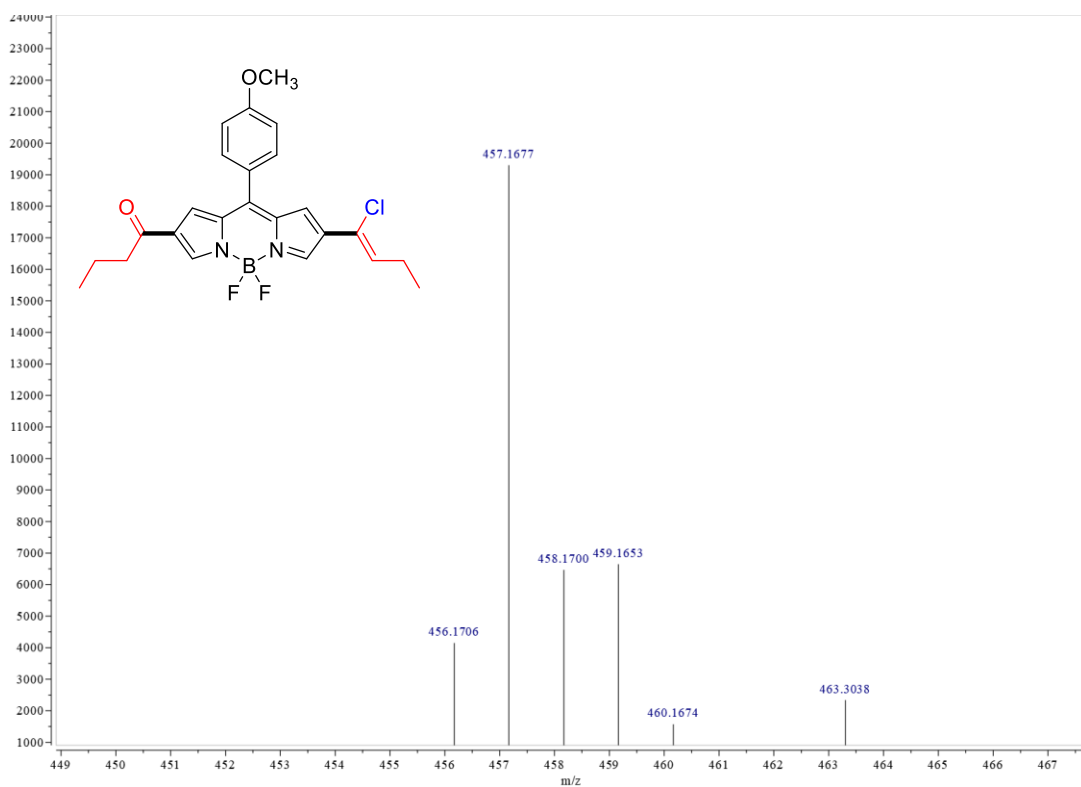

### HRMS spectra of 4i

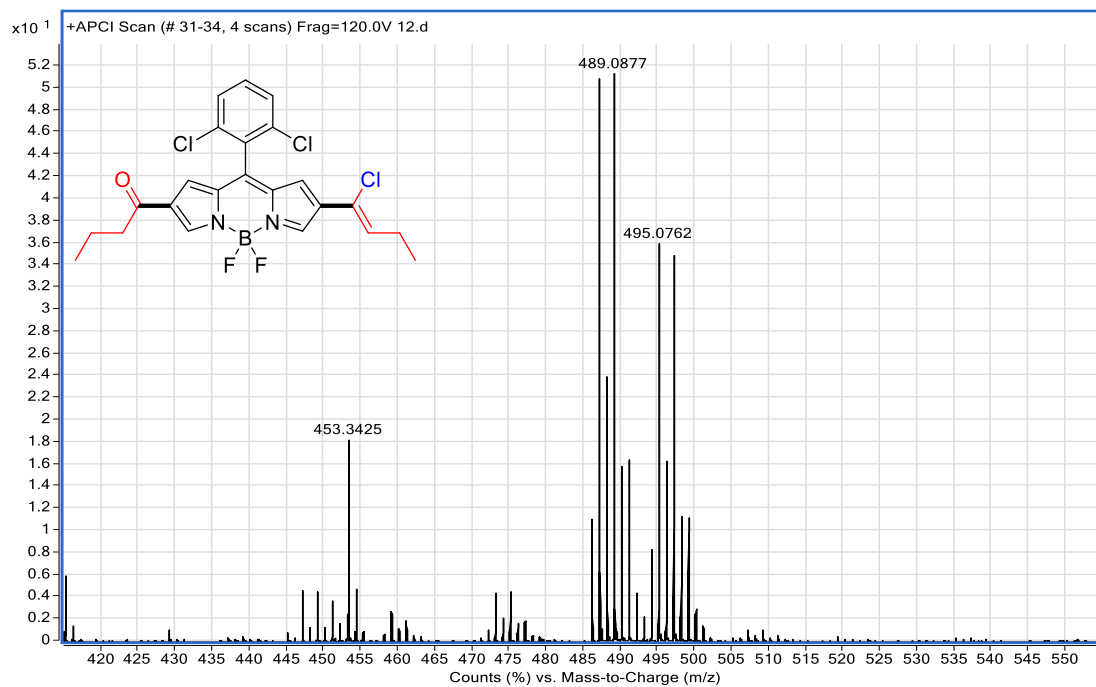



## HRMS spectra of 5

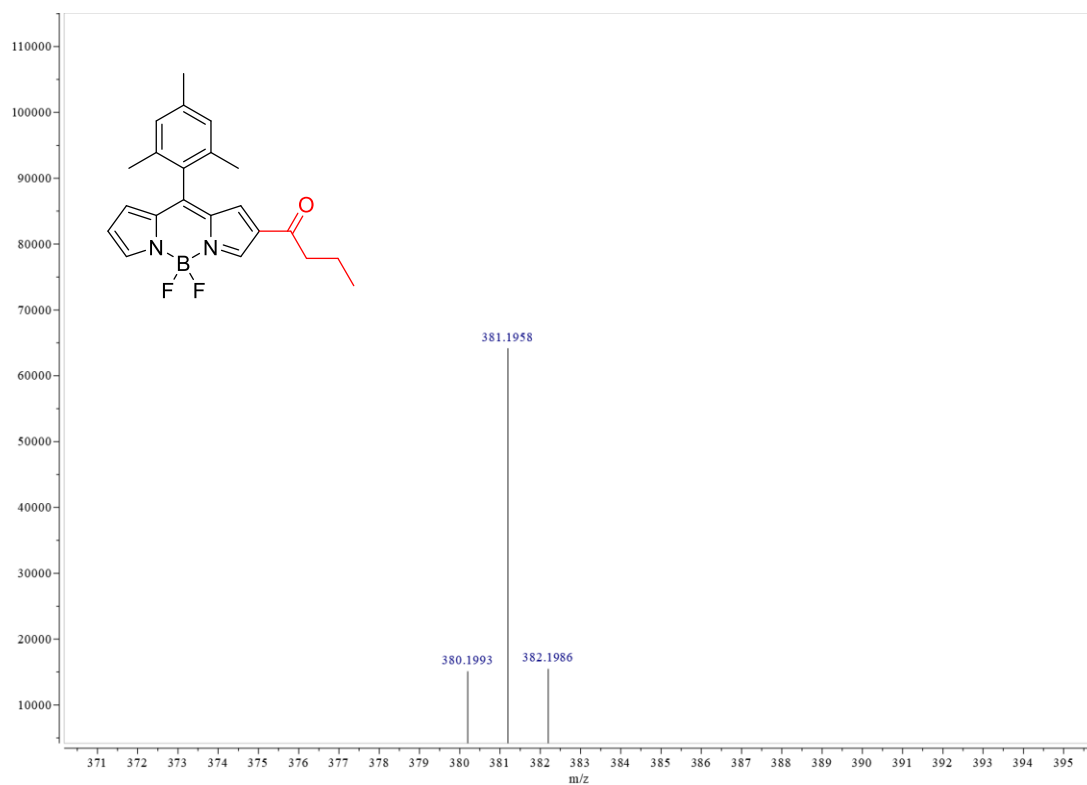

## HRMS spectra of 6

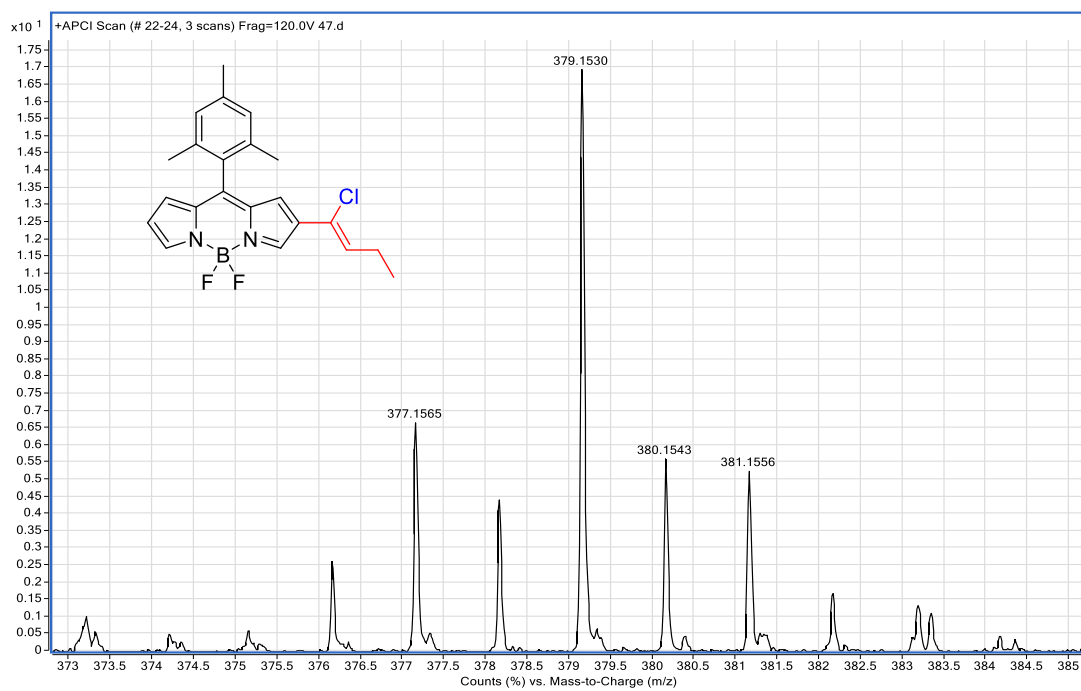

### HRMS spectra of **7**

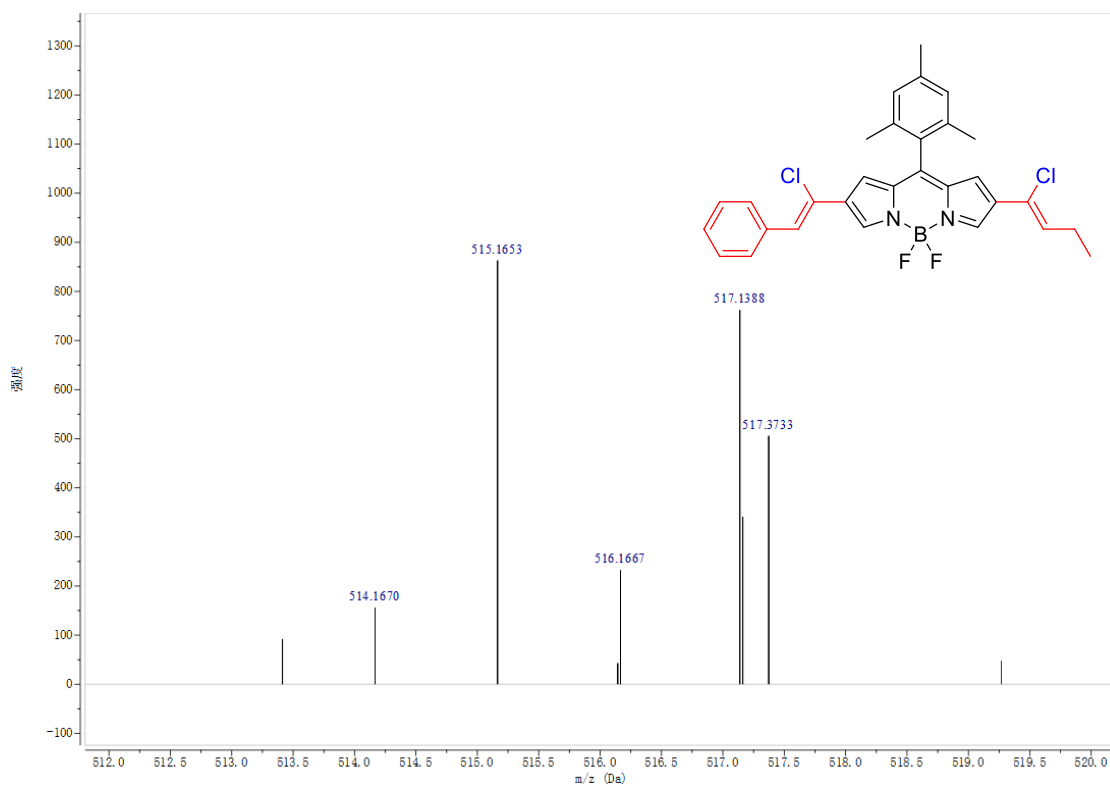

### HRMS spectra of **3d-p**

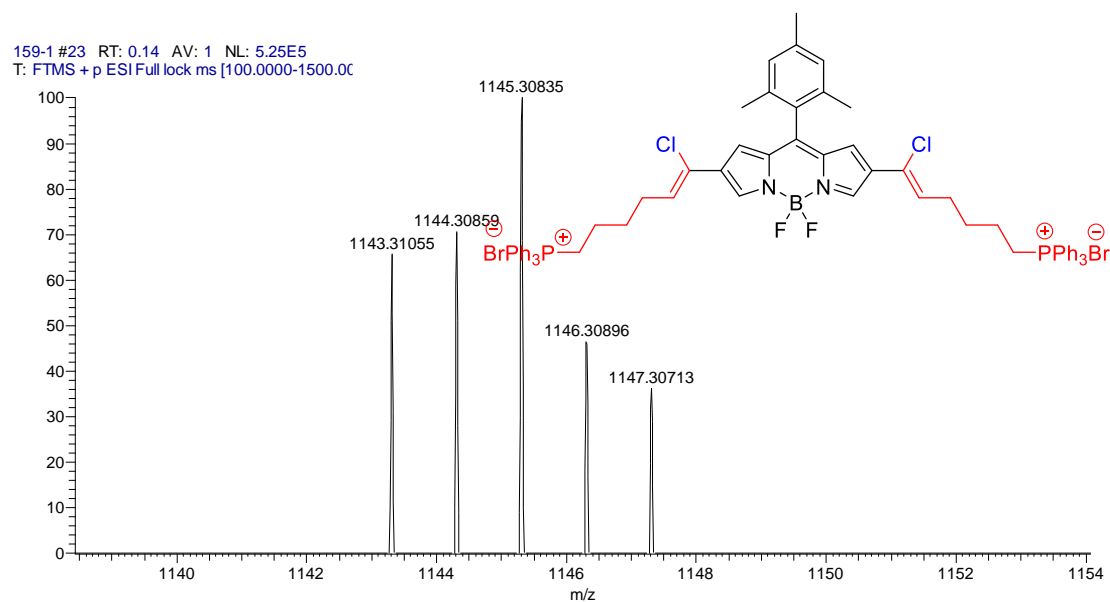

## References:

1. Olmsted J. *J. Phys. Chem.*, **1979**, 83, 2581.
2. Casey, YKG.; Quitevis, EL. *J. Phys. Chem.*, **1988**, 92, 6590.
3. a) Benson, R. C.; Kues, H. A. *Phys. Med. Biol.*, **1978**, 23, 159; b) Lakowicz, J. *Principles of Fluorescence Spectroscopy*, 3rd ed., Springer-Verlag: New York, **2006**.
4. SAINT V 6.01 (NT) *Software for the CCD Detector System*, Bruker Analytical X-ray Systems, Madison, WI **1999**.
5. Sheldrick, G. M. SHELXS-90, *Program for the Solution of Crystal Structure*, University of Göttingen, Germany, **1990**.
6. SHELXL-97, *Program for the Refinement of Crystal Structure*, University of Göttingen, Germany, **1997**.
7. SHELXTL 5.10 (PC/NT-Version), *Program library for Structure Solution and Molecular Graphics*, Bruker Analytical X-ray Systems, Madison, WI **1998**.
